# Supplementary material
Source: PubMed Central journal article supplement (PMC5953424)
Supplement: NIHMS600567-supplement-1.pdf [file NIHMS600567-supplement-1.pdf]

## Supplementary Information for manuscript:

### “A high-throughput, multiplexed assay for superfamily-wide profiling of enzyme activity”

Daniel A. Bachovchin<sup>1</sup>, Luke W. Koblan<sup>1</sup>, Wengen Wu<sup>2</sup>, Yuxin Liu<sup>2</sup>, Youhua Li<sup>2</sup>, Peng Zhao<sup>2</sup>, Iwona Woznica<sup>2</sup>, Ying Shu<sup>2</sup>, Jack H. Lai<sup>2</sup>, Sarah E. Poplawski<sup>2</sup>, Christopher P. Kiritsy<sup>3</sup>, Sarah E. Healey<sup>2</sup>, Matthew DiMare<sup>2</sup>, David G. Sanford<sup>2</sup>, Robert S. Munford<sup>4</sup>, William W. Bachovchin<sup>2,3</sup>, & Todd R. Golub<sup>1,5,6,7\*</sup>

#### Affiliations:

<sup>1</sup>The Eli and Edythe L. Broad Institute, Cambridge, MA 02142, USA. <sup>2</sup>Department of Biochemistry, Tufts University Sackler School of Graduate Biomedical Sciences, Boston, MA 02111, USA. <sup>3</sup>Arisaph Pharmaceuticals, 100 High Street, Boston, MA 02110, USA. <sup>4</sup>Laboratory of Clinical Infectious Diseases, National Institute of Allergy and Infectious Diseases, National Institutes of Health, Bethesda, MD 20892, USA. <sup>5</sup>Department of Pediatric Oncology, Dana-Farber Cancer Institute, 44 Binney Street, Boston, Massachusetts 02115 USA. <sup>6</sup>Harvard Medical School, Boston, Massachusetts 02115, USA. <sup>7</sup>Howard Hughes Medical Institute, Chevy Chase, Maryland 20815, USA.

\*Correspondence to: [golub@broadinstitute.org](mailto:golub@broadinstitute.org)



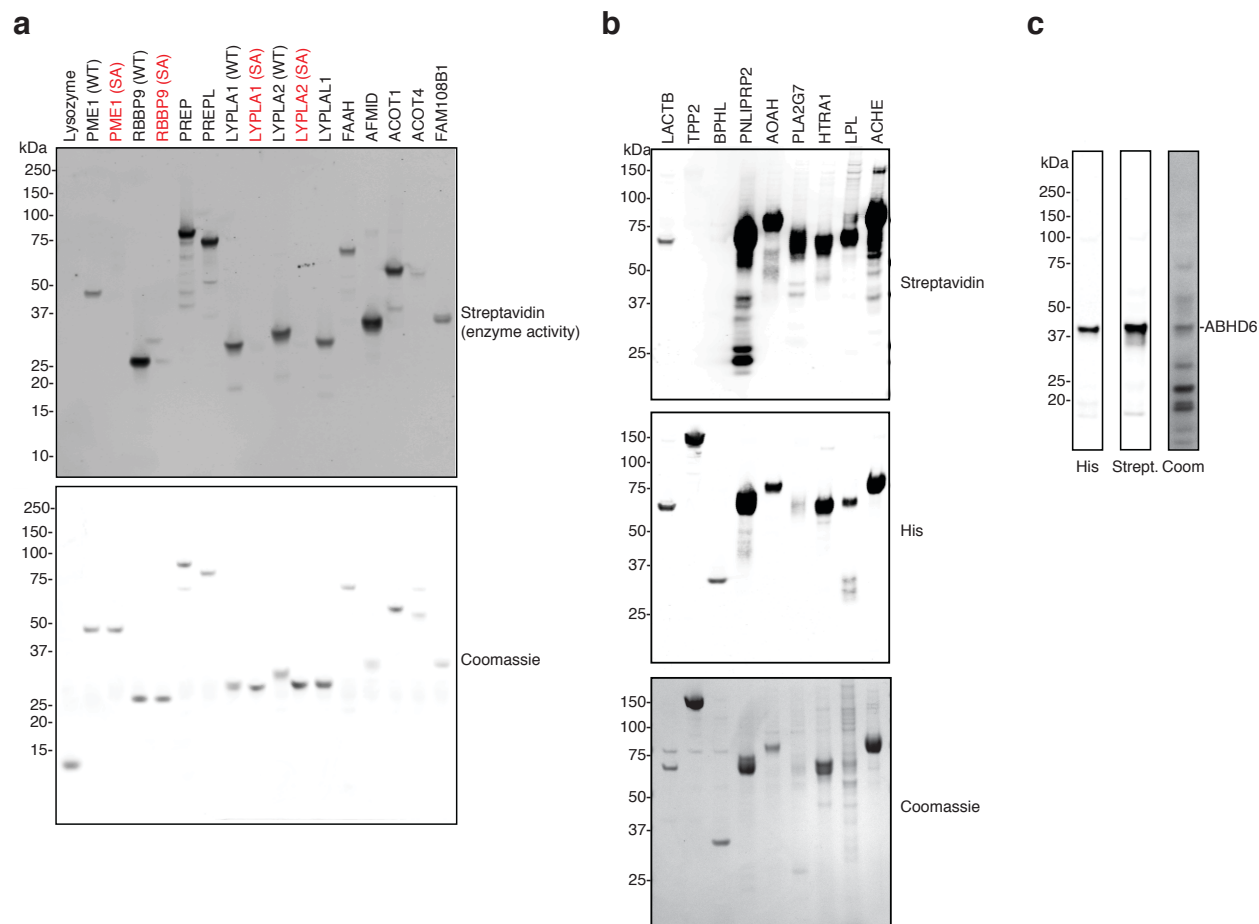

**Supplementary Figure 2** Representative analyses of protein purity and activity. Enzymes purified from **(a)** *E. coli* or **(b)** HEK 293T cells were labeled with FP-biotin (1  $\mu$ M), separated by SDS-PAGE, and analyzed by Western blotting with a streptavidin-conjugated infrared dye to confirm activity (the appearance of a band in the streptavidin blot indicates an active enzyme). Note that the catalytically inactivated proteins (colored red) and lysozyme do not label with the FP-probe. Similarly, we saw no labeling for two purified serine hydrolases, TPP2 and BPHL, indicating that these enzymes were either inactive or do not react with the FP-probe. **(c)** A few proteins, including His-tagged ABHD6, were difficult to purify to homogeneity. Here, co-migration of the His band and the streptavidin band indicates that ABHD6 is the only active hydrolase in the sample, even though it is <25% pure by Coomassie staining. The EnPlex assay only requires purity from other FP-sensitive enzymes, as shown here for ABHD6, and not from all cellular proteins.

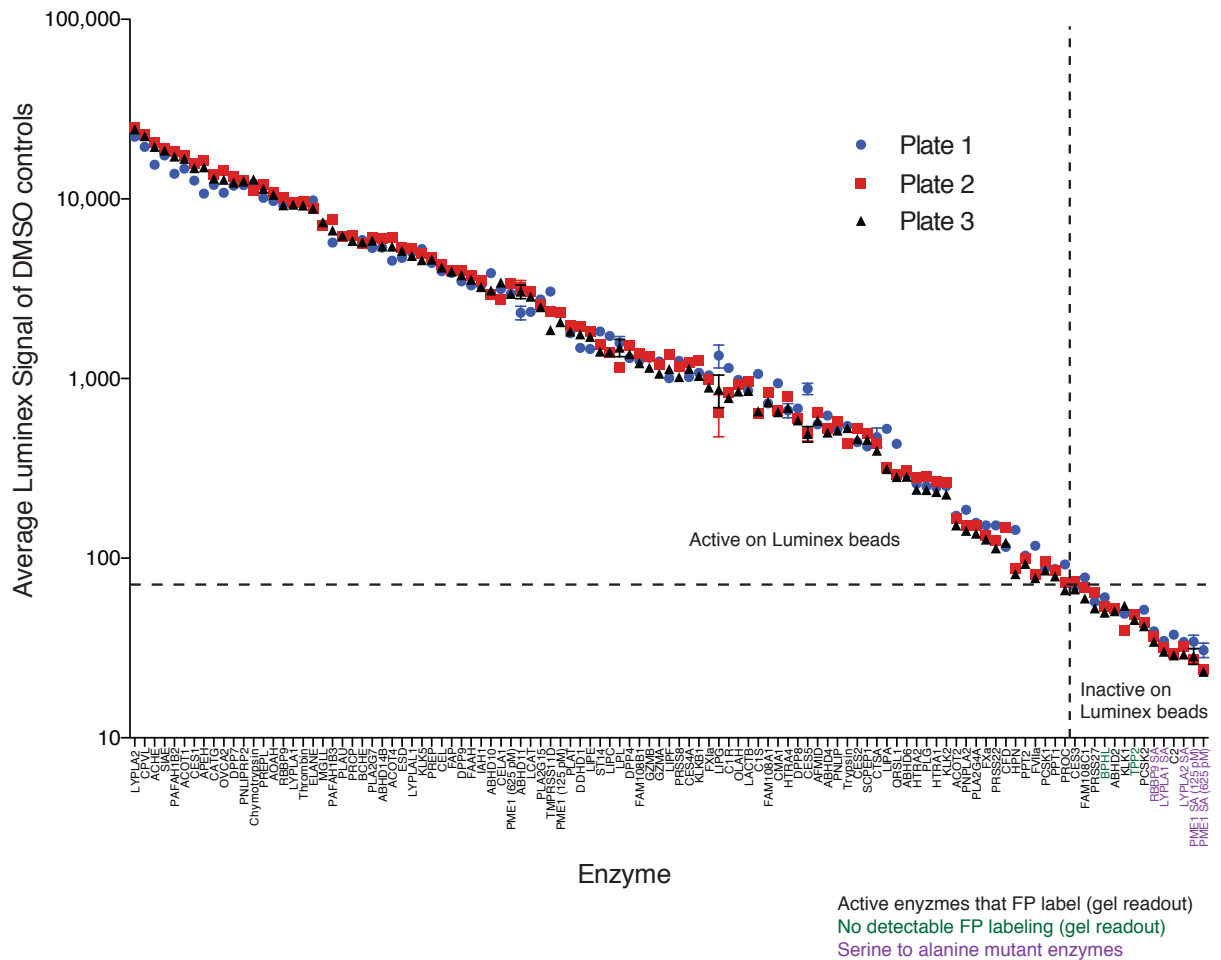

**Supplementary Figure 3** EnPlex assay reproducibility. Bead mixtures (frozen aliquots thawed one time) were evaluated on separate days on separate plates. Enzymes were considered active that gave signals >2-fold higher than that observed with catalytically inactivated enzymes (corresponding to a Luminex signal of 75). The median Luminex signal reflects both enzyme abundance and rate of reactivity with the FP-probe. The reason several FP-sensitive enzymes appear inactive on the beads is unclear, but is potentially due to immobilization impairing catalytic activity. Error bars represent s.e.m.

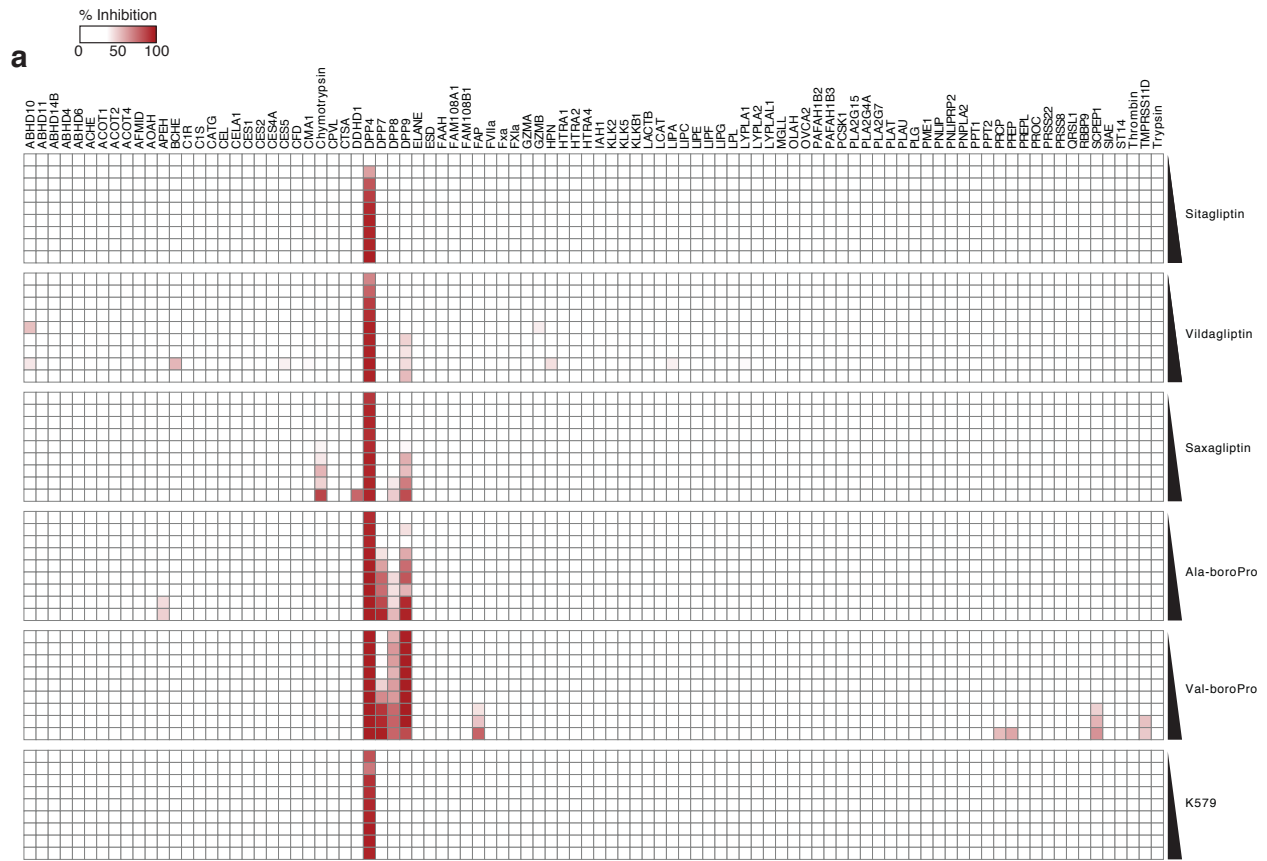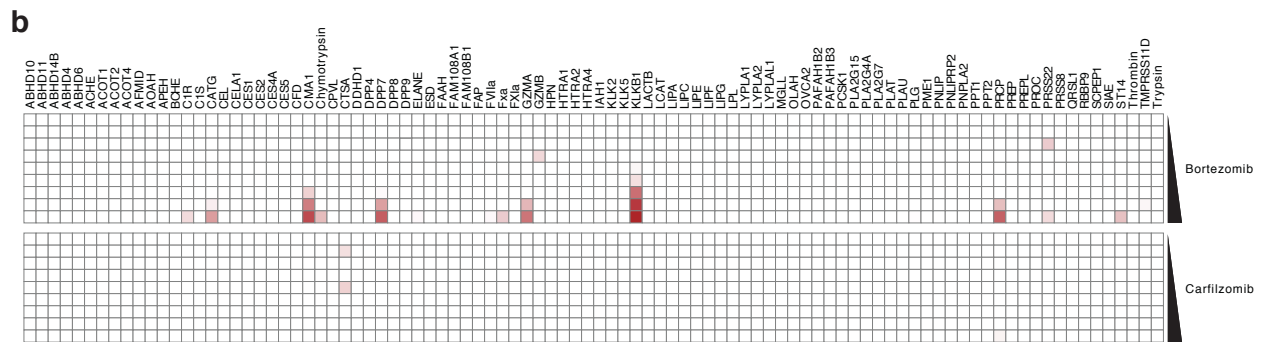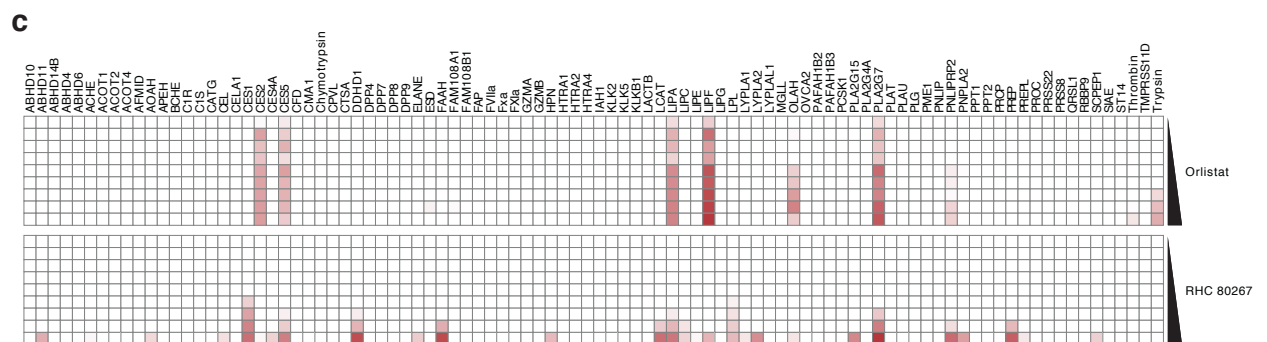

**d**

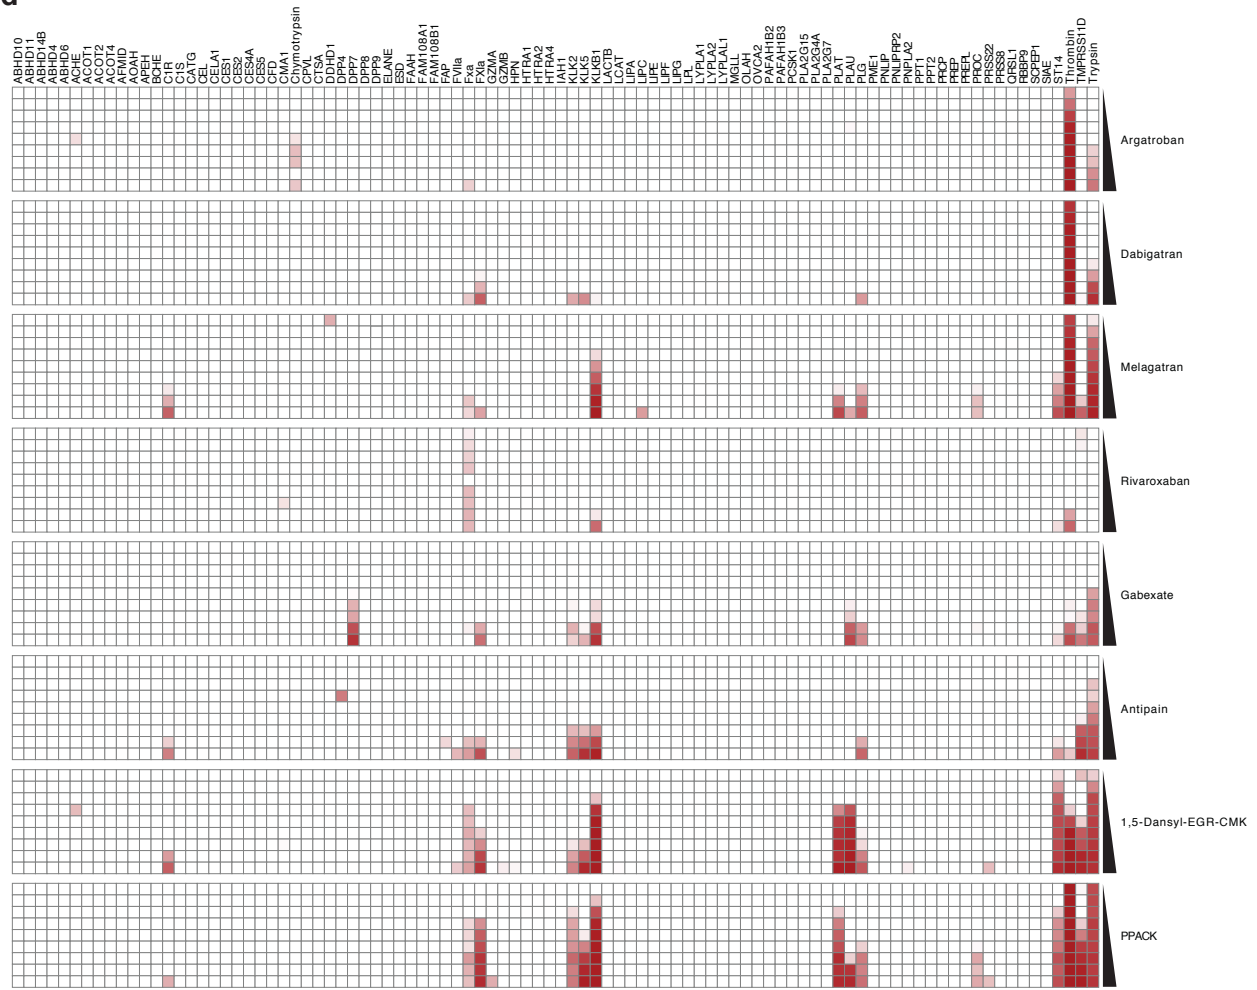

**e**

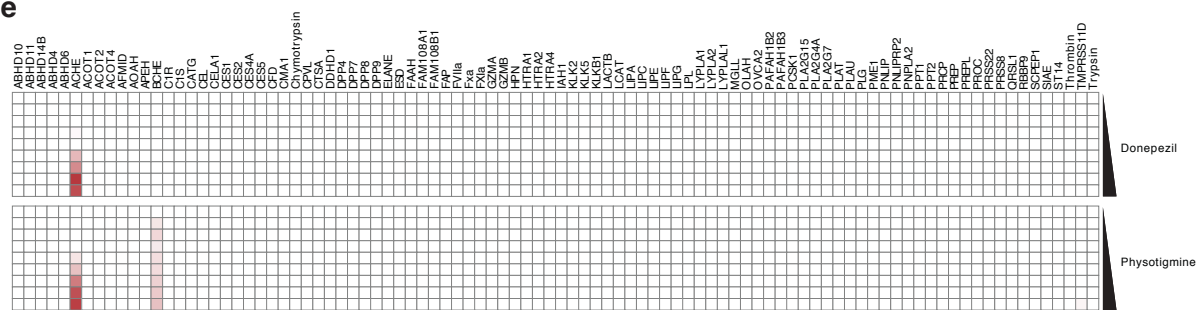

f

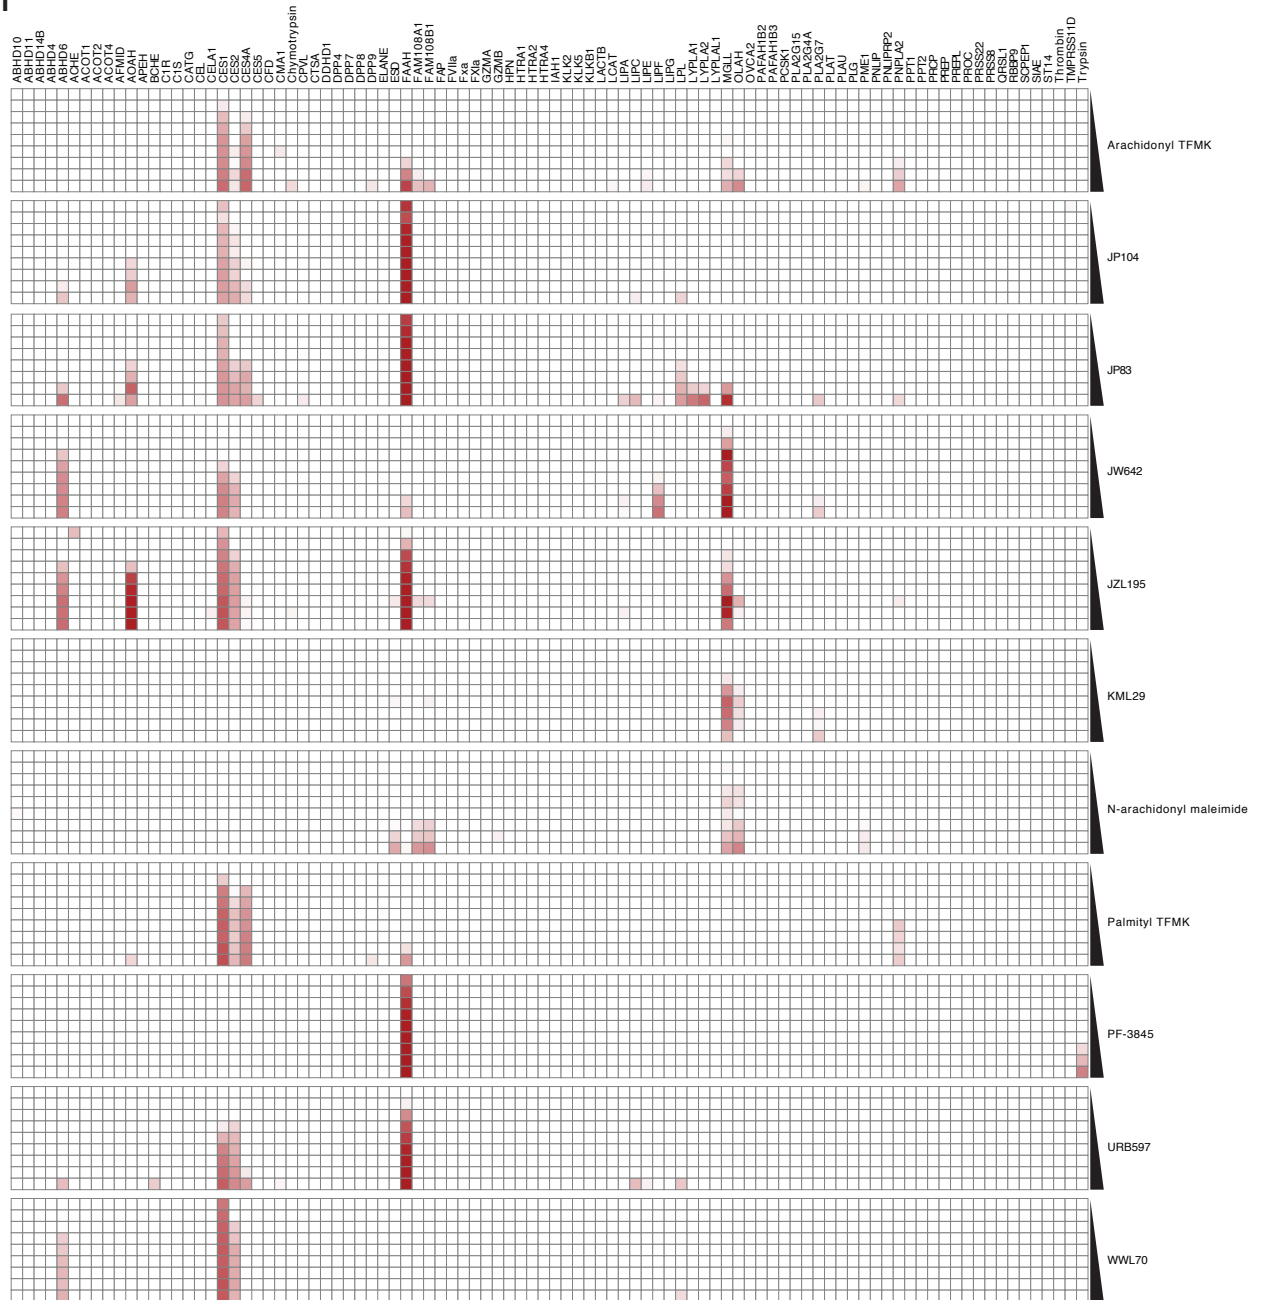

g

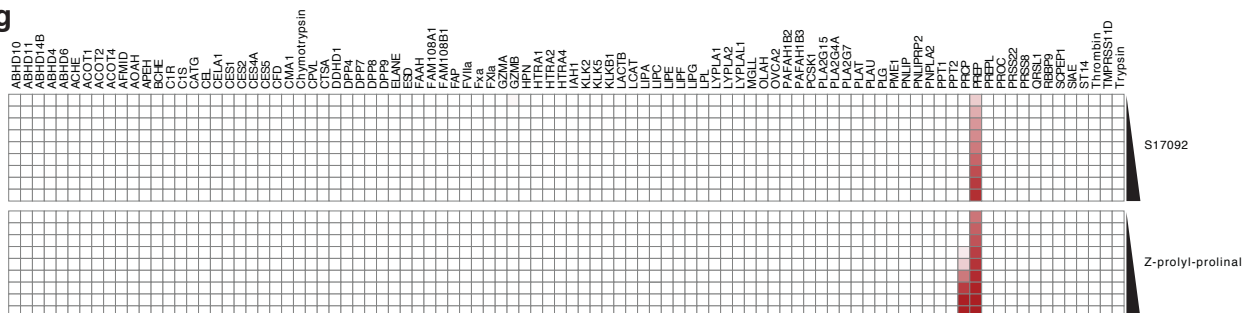

h

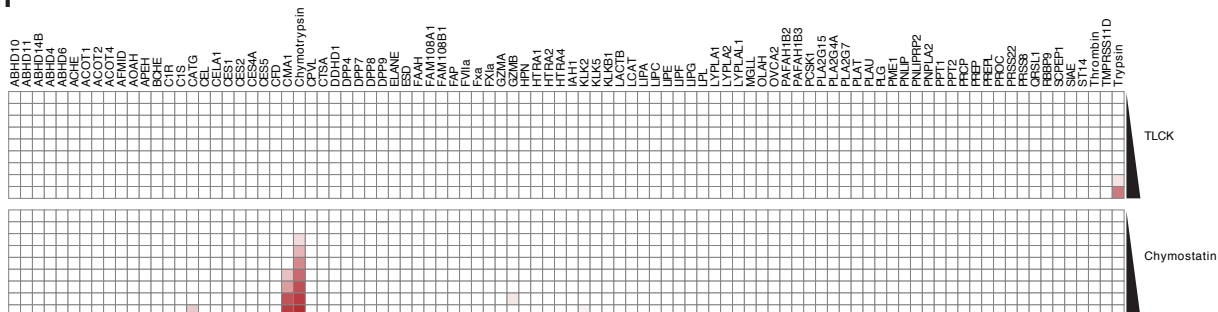

i

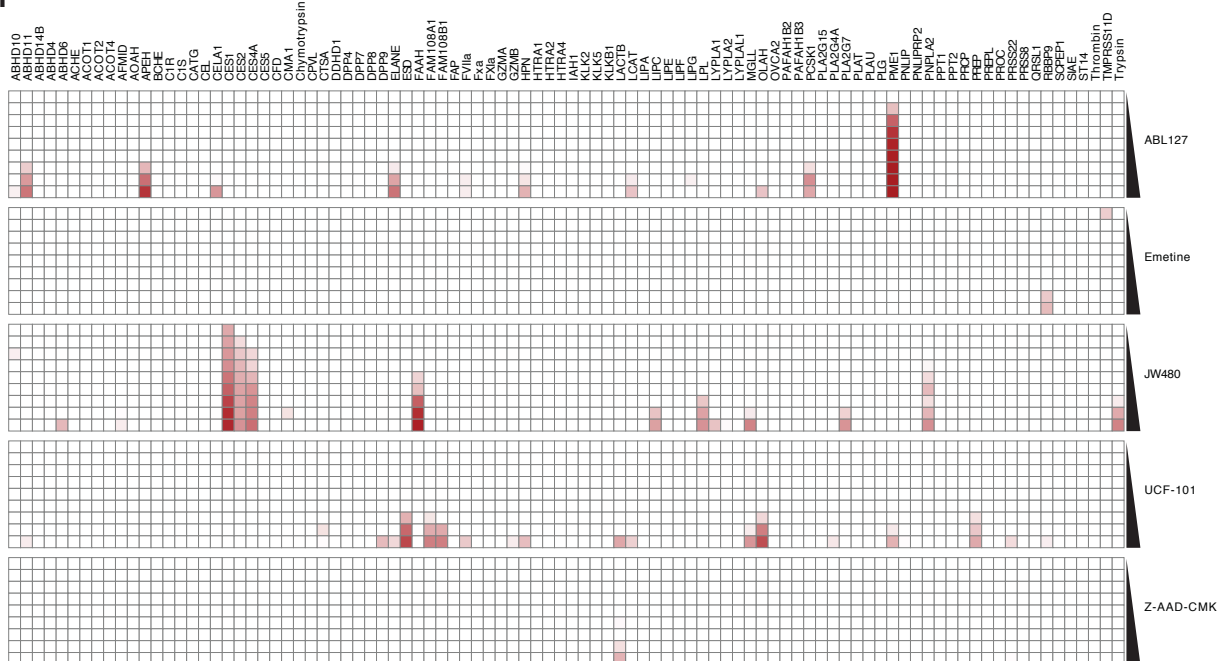



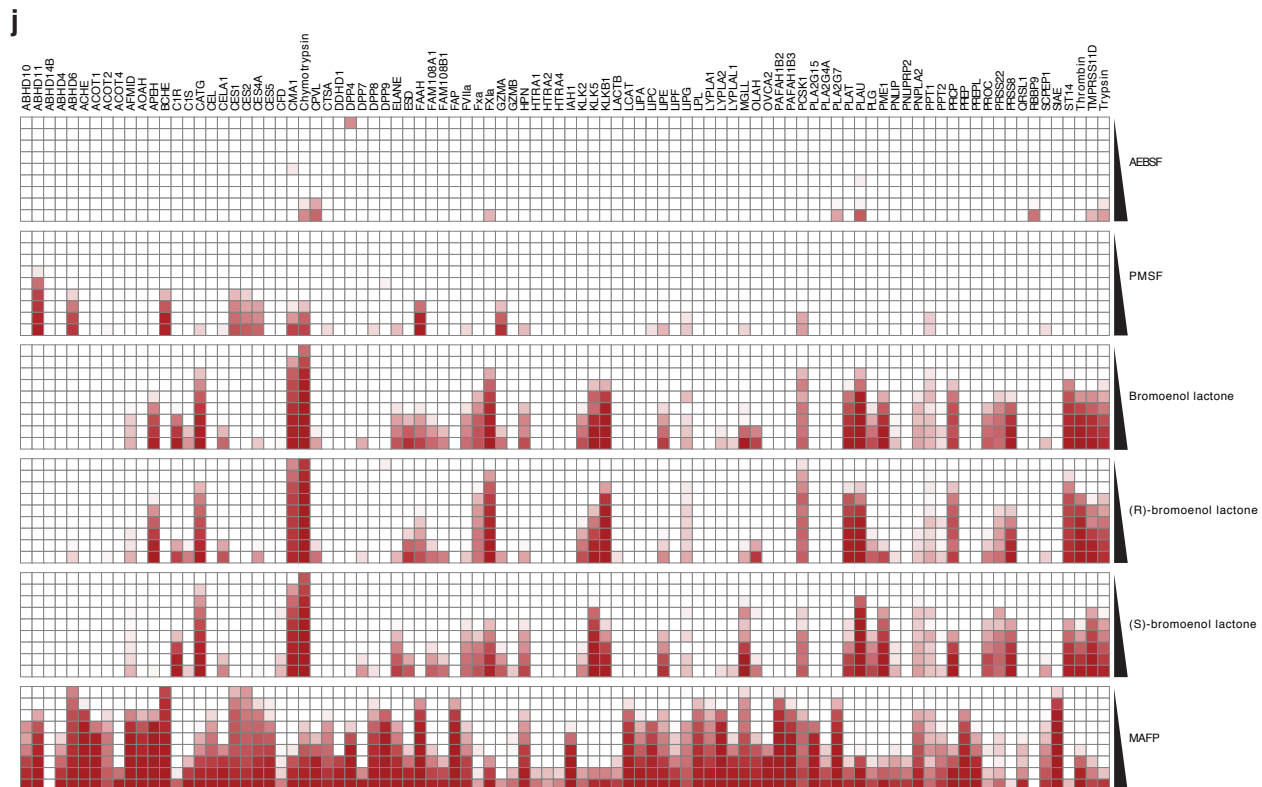

**Supplementary Figure 4** Complete EnPlex profiles for the 55 widely used inhibitors with at least one target in the enzyme panel. Inhibitors were grouped according their intended target(s): **(a)** dipeptidyl peptidases, **(b)** proteasome, **(c)** DAG lipase (and assorted other lipases), **(d)** enzymes involved in blood clotting, **(e)** ACHE, **(f)** FAAH, MGLL, and ABHD6, **(g)** PREP, **(h)** trypsin/chymotrypsin, **(i)** other, and **(j)** non-selective.

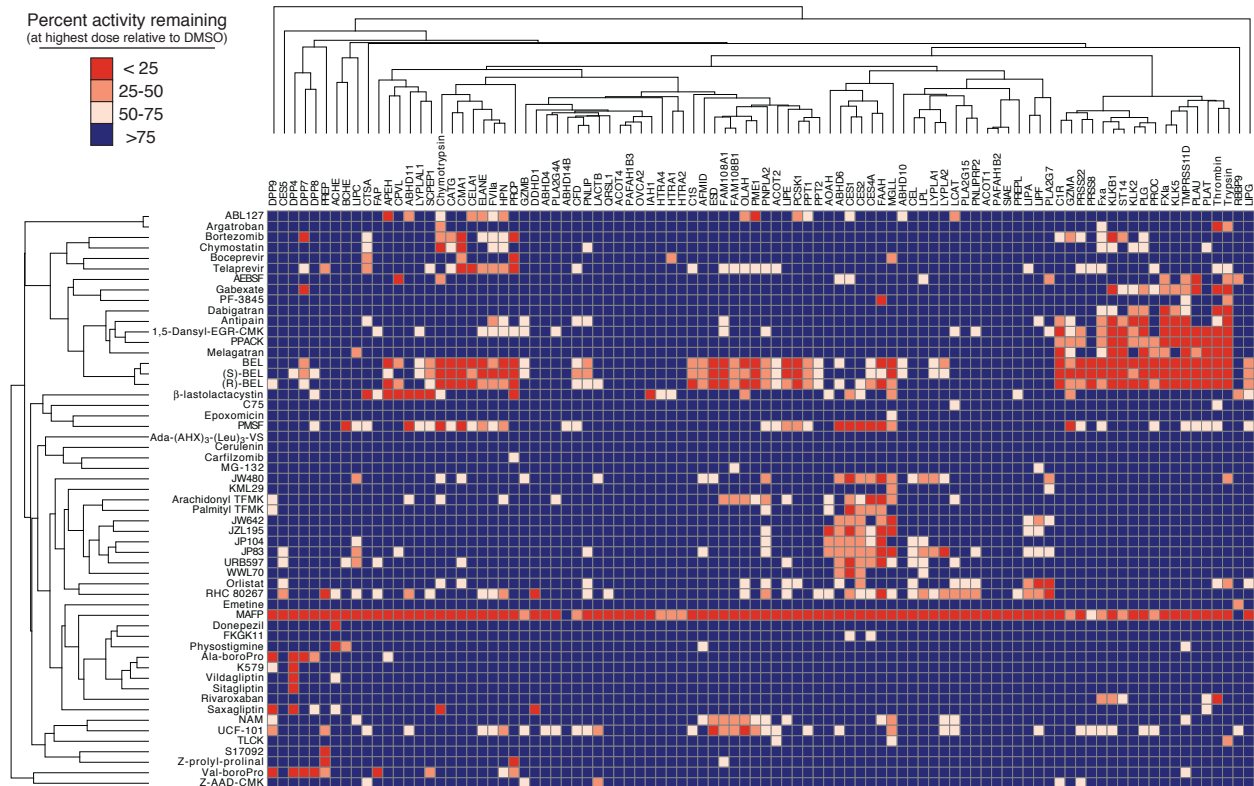

**Supplementary Figure 5** Two-dimensional hierarchical clustering of all interactions at the highest compound concentration for the 55 widely used inhibitors (33  $\mu$ M for all compounds except for Ada-(AHX)<sub>3</sub>-(Leu)<sub>3</sub>-VS and epoxomicin, which were screened at 16.7  $\mu$ M). The percent activity remaining relative to DMSO controls is shown. Clustering was performed based on the Pearson correlation.

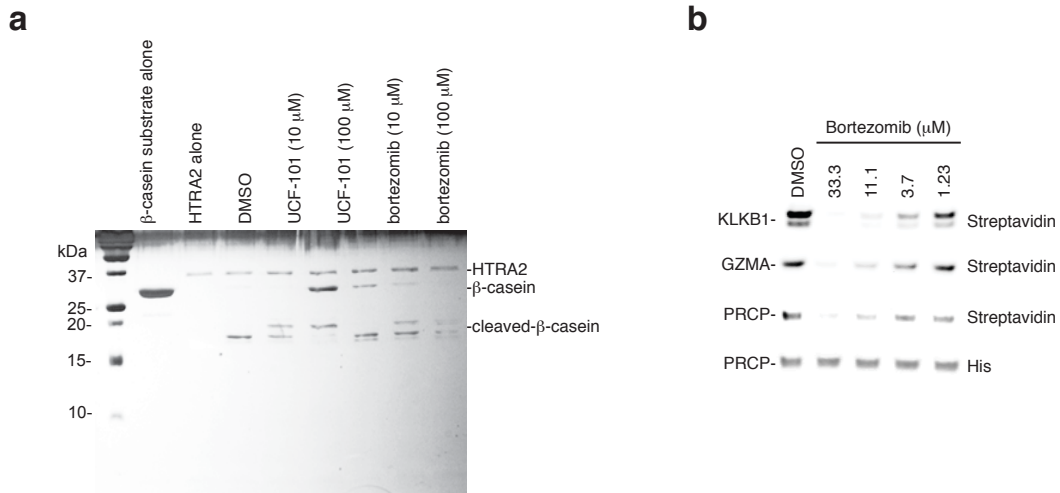

**Supplementary Figure 6** Validation of bortezomib off-targets. **(a)** HTRA2 (0.02 mg/mL) was incubated with its substrate  $\beta$ -casein (0.02 mg/mL) for 1 h in the presence of bortezomib or the HTRA2 inhibitor UCF-101 before being quenched, separated by SDS-PAGE, and analyzed by silver staining. This shows that bortezomib, even at 100  $\mu\text{M}$ , does not significantly inhibit HTRA2. **(b)** Gel-based competitive ABPP confirms bortezomib inhibits KLKB1, GZMA, and PRCP. Full gel images are shown in **Supplementary Figure 11**.

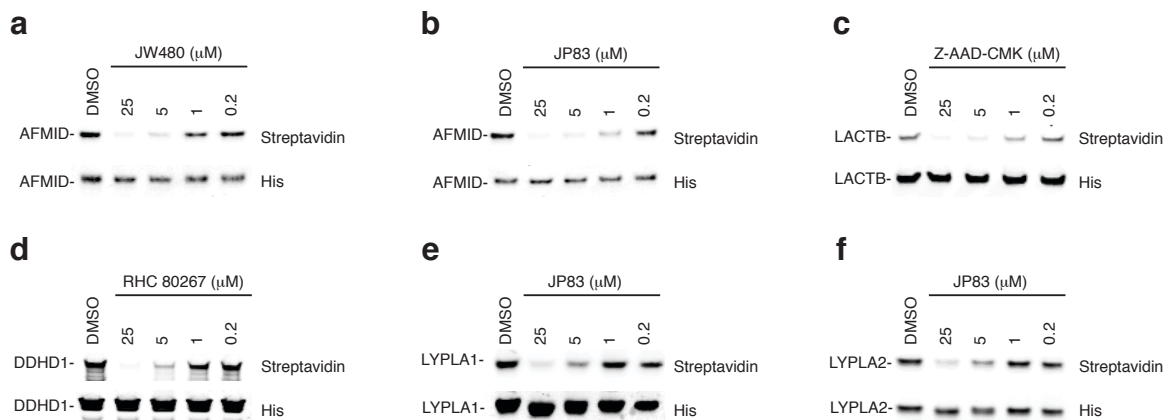

**Supplementary Figure 7** Validation of lead inhibitor candidates identified in the EnPlex screen from the 55 widely used inhibitor library. The interactions between (a) JW480 and AFMID, (b) JP83 and AFMID, (c) Z-AAD-CMK and LACTB, (d) RHC 80267 and DDHD1, (e) JP83 and LYPLA1, and (f) JP83 and LYPLA2 were confirmed by gel-based competitive ABPP. Full gel images are shown in **Supplementary Figure 11**.

Percent inhibition

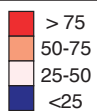

33  $\mu$ M

3.3  $\mu$ M

0.33  $\mu$ M

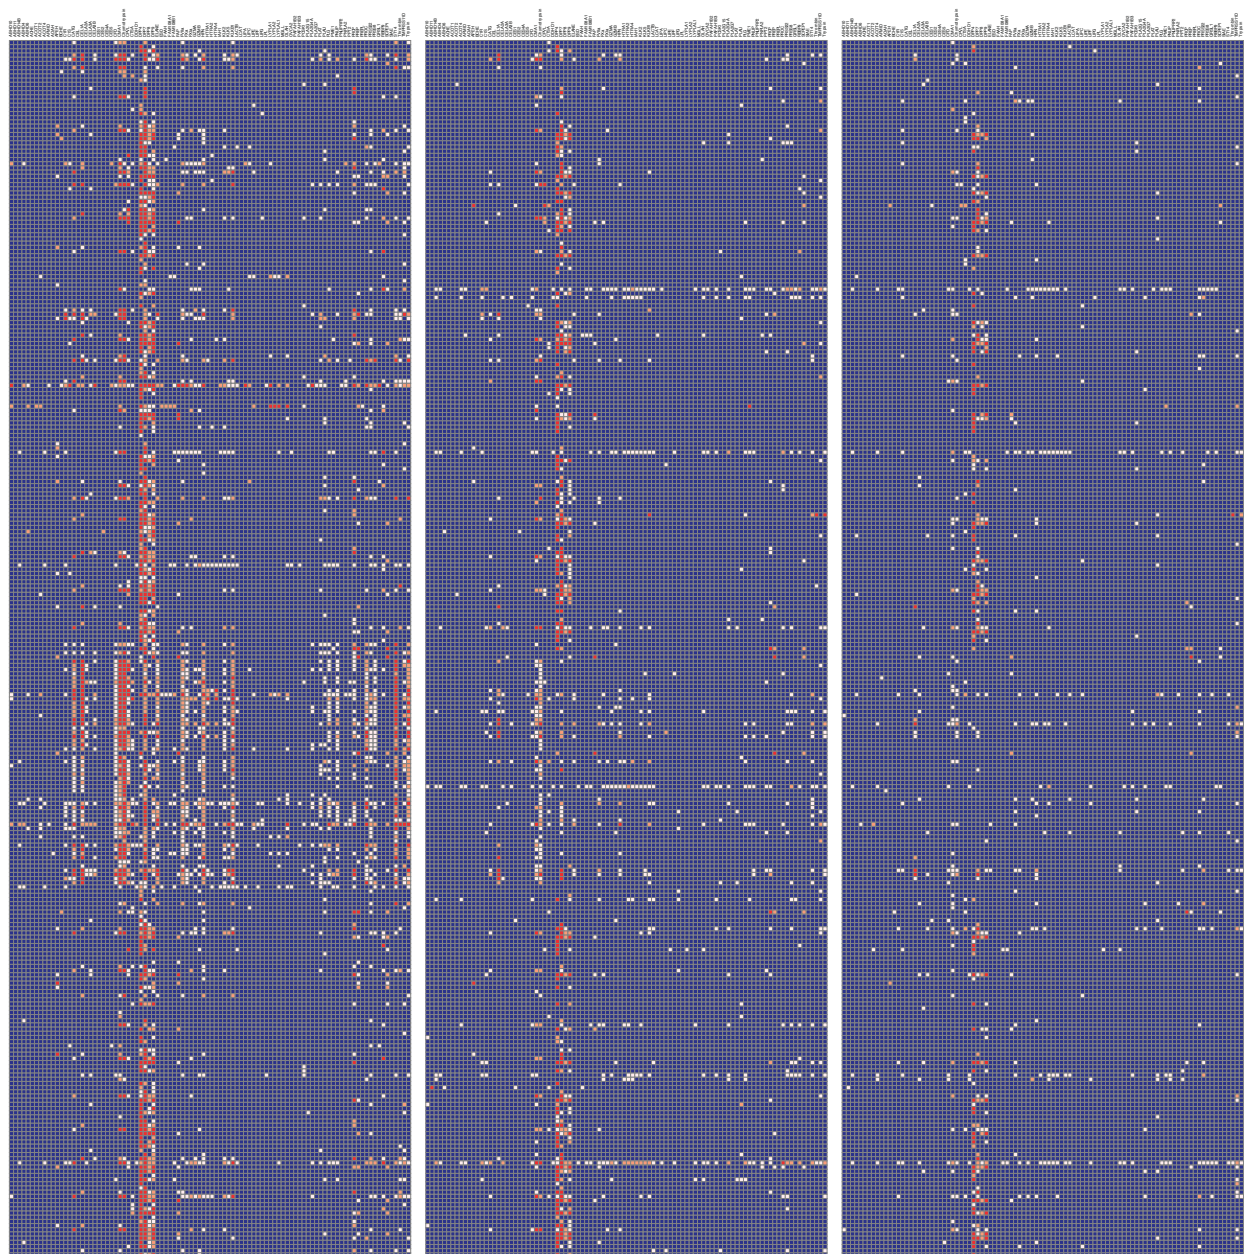

**Supplementary Figure 8** Heatmaps of the boronic acid and nitrile screening data. The percent inhibition of each enzyme (columns) relative to DMSO controls is shown. The compound numbers (rows) correspond to **Supplementary Table 6**.

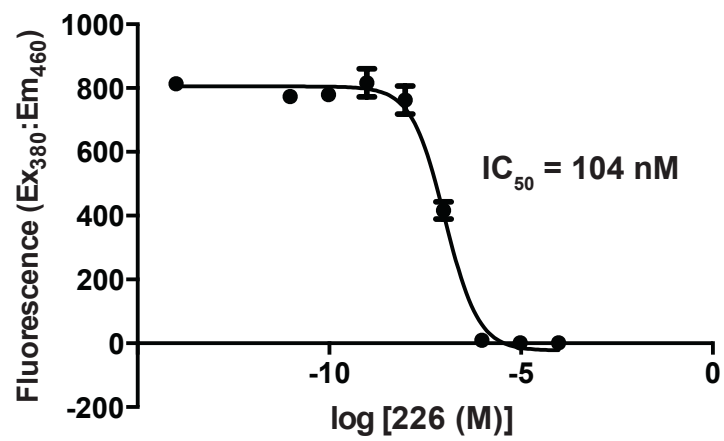

**Supplementary Figure 9** Compound **226** inhibits APEH with an IC<sub>50</sub> = 104 nM in a substrate (Ac-Ala-AMC) assay. Data are means ± s.e.m of three independent experiments.

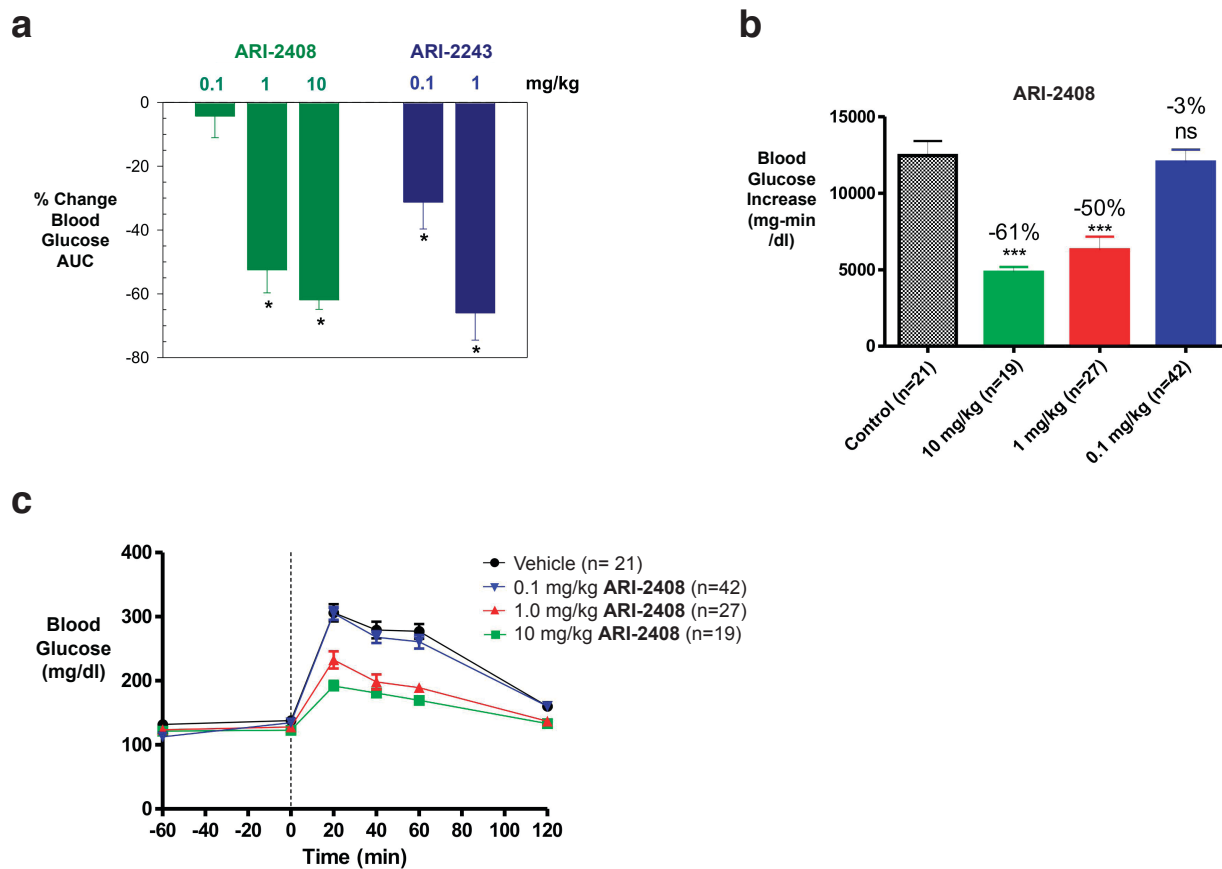

**Supplementary Figure 10** ARI-2408 and ARI-2243 have potent antiglycemic activity in mice in an oral glucose tolerance test. **(a)** The percent change in blood glucose AUC for both compounds.  $n = 7$  mice/group for ARI-2243;  $n = 19, 27,$  and  $42$  mice/group for ARI-2408 at 10, 1 and 0.1 mg/kg, respectively. **(b)** The blood glucose increase (mg-min/dL) and **(c)** complete time course for ARI-2408. \* $p < 0.01$  versus vehicle control; \*\*\*  $p < 0.001$  versus vehicle control. Error bars represent s.e.m.





**Supplementary Table 1** Comparison of competitive ABPP screening methods for serine hydrolases.

|                            | <b>ABPP-MudPIT</b>                                                                                                                                                                    | <b>Gel-based ABPP</b>                                                                                                                                 | <b>Fluopol-ABPP</b>                                                                                                                  | <b>EnPlex</b>                                                                                         |
|----------------------------|---------------------------------------------------------------------------------------------------------------------------------------------------------------------------------------|-------------------------------------------------------------------------------------------------------------------------------------------------------|--------------------------------------------------------------------------------------------------------------------------------------|-------------------------------------------------------------------------------------------------------|
| <b>Readout</b>             | Mass spectrometry                                                                                                                                                                     | SDS-PAGE                                                                                                                                              | Fluorescence polarization                                                                                                            | Luminex                                                                                               |
| <b>Enzymes</b>             | 30-40                                                                                                                                                                                 | 10-20                                                                                                                                                 | 1                                                                                                                                    | 100s                                                                                                  |
| <b>Compounds</b>           | 3-5                                                                                                                                                                                   | hundreds                                                                                                                                              | thousands                                                                                                                            | thousands                                                                                             |
| <b>Major limitation(s)</b> | <ul style="list-style-type: none"> <li>• Low throughput</li> <li>• Expensive</li> <li>• Selectivity information limited to active enzymes in specific cell lysates/tissues</li> </ul> | <ul style="list-style-type: none"> <li>• Low throughput</li> <li>• Limited selectivity information (due to gel resolution and sensitivity)</li> </ul> | <ul style="list-style-type: none"> <li>• Requires large amounts of purified protein</li> <li>• No selectivity information</li> </ul> | <ul style="list-style-type: none"> <li>• Requires purified protein, but only small amounts</li> </ul> |

**Supplementary Table 2** Enzyme panel assembled in this study.

| Gene Symbol | Preferred Protein Name                                     | NCBI Gene ID | Genbank Accession number | Species             | Expression system   | clone         | Tag                 | Vendor, if applicable |
|-------------|------------------------------------------------------------|--------------|--------------------------|---------------------|---------------------|---------------|---------------------|-----------------------|
| ABHD2       | Abhydrolase domain-containing protein 2                    | 11057        | NP_008942.3              | <i>Homo sapiens</i> | E. coli             | full-length   | C-terminal His/V5   |                       |
| ABHD4       | Abhydrolase domain-containing protein 4                    | 63874        | NP_071343.2              | <i>Homo sapiens</i> | HEK293T             | full-length   | C-terminal FLAG/His |                       |
| ABHD6       | Monoacylglycerol lipase ABHD6                              | 57406        | NP_065727.4              | <i>Homo sapiens</i> | E. coli             | aa 29-end     | C-terminal His/V5   |                       |
| ABHD10      | Mycophenolic acid acyl-glucuronide esterase, mitochondrial | 55347        | NP_060864.1              | <i>Homo sapiens</i> | HEK293T             | full-length   | C-terminal FLAG/His |                       |
| ABHD11      | Abhydrolase domain-containing protein 11                   | 83451        | NP_068370.1              | <i>Homo sapiens</i> | E. coli             | full-length   | C-terminal His/myc  |                       |
| ABHD14B     | Abhydrolase domain-containing protein 14B                  | 84836        | NP_001139786.1           | <i>Homo sapiens</i> | E. coli             | full-length   | C-terminal His/V5   |                       |
| ACHE        | Acetylcholinesterase                                       | 11423        | NP_033729.1              | <i>Mus musculus</i> | HEK293T             | full-length   | C-terminal FLAG/His |                       |
| ACOT1       | Acyl-coenzyme A thioesterase 1                             | 641371       | NP_001032238.1           | <i>Homo sapiens</i> | E. coli             | full-length   | C-terminal His/V5   |                       |
| ACOT2       | Acyl-coenzyme A thioesterase 2                             | 10965        | NP_006812.3              | <i>Homo sapiens</i> | HEK293T             | full-length   | C-terminal FLAG/His |                       |
| ACOT4       | Acyl-coenzyme A thioesterase 4                             | 122970       | NP_068954.3              | <i>Homo sapiens</i> | E. coli             | full-length   | C-terminal His/V5   |                       |
| AFMID       | Kynurenine formamidase                                     | 125061       | NP_001138998.1           | <i>Homo sapiens</i> | E. coli             | full-length   | C-terminal His/V5   |                       |
| AOAH        | Acyl-oxacyl hydrolase                                      | 313          | NP_001628.1              | <i>Homo sapiens</i> | HEK293T             | full-length   | C-terminal FLAG/His |                       |
| APEH        | Acylamino-acid-releasing enzyme                            | 327          | NP_001631.3              | <i>Homo sapiens</i> | HEK293T             | full-length   | C-terminal FLAG/His |                       |
| BCHE        | Cholinesterase                                             | 590          | NP_000046.1              | <i>Homo sapiens</i> | HEK293T             | full-length   | C-terminal FLAG/His |                       |
| BPHL        | Valacyclovir hydrolase                                     | 670          | NP_004323.2              | <i>Homo sapiens</i> | HEK293T             | full-length   | C-terminal FLAG/His |                       |
| C1R         | Complement C1r subcomponent                                | 715          | NP_001724.3              | <i>Homo sapiens</i> | Mouse myeloma cells | full-length   | C-terminal His      | R&D Systems           |
| C1S         | Complement C1s subcomponent                                | 716          | NP_095850.1              | <i>Homo sapiens</i> | Mouse myeloma cells | full-length   | C-terminal His      | R&D Systems           |
| C2          | Complement C2                                              | 717          | NP_000054.2              | <i>Homo sapiens</i> | Mouse myeloma cells | aa 21-752     | C-terminal His      | R&D Systems           |
| CEL         | Bile salt-activated lipase                                 | 1056         | NP_001798.2              | <i>Homo sapiens</i> | HEK293T             | full-length   | C-terminal FLAG/His |                       |
| CELA1       | Chymotrypsin-like elastase family member 1                 | 396766       | NP_099898.1              | <i>Sus scrofa</i>   | Porcine pancreas    | aa 27-264     | none                | abcam                 |
| CELA2A      | Chymotrypsin-like elastase family member 2A                | 63036        | NP_254275.1              | <i>Homo sapiens</i> | HEK293T             | active enzyme | C-terminal FLAG/His |                       |
| CELA3A      | Chymotrypsin-like elastase family member 3A                | 10136        | NP_005738.4              | <i>Homo sapiens</i> | HEK293T             | active enzyme | C-terminal FLAG/His |                       |
| CELA3B      | Chymotrypsin-like elastase family member 3B                | 23436        | NP_031378.1              | <i>Homo sapiens</i> | HEK293T             | active enzyme | C-terminal FLAG/His |                       |
| CES1        | Liver carboxylesterase 1                                   | 1066         | NP_001020366.1           | <i>Homo sapiens</i> | HEK293T             | full-length   | C-terminal FLAG/His |                       |
| CES2        | Cocaine esterase                                           | 8824         | NP_003860.2              | <i>Homo sapiens</i> | HEK293T             | full-length   | C-terminal FLAG/His |                       |
| CES3        | Carboxylesterase 3                                         | 23491        | NP_079198.2              | <i>Homo sapiens</i> | HEK293T             | full-length   | C-terminal FLAG/His |                       |
| CES4A       | Carboxylesterase 4A                                        | 283848       | NP_077617.5              | <i>Homo sapiens</i> | HEK293T             | full-length   | C-terminal FLAG/His |                       |
| CES5        | Carboxylesterase 5A                                        | 234673       | NP_076637.1              | <i>Mus musculus</i> | Mouse myeloma cells | full-length   | C-terminal His      | R&D Systems           |
| CFD         | Complement factor D                                        | 1675         | NP_001919.2              | <i>Homo sapiens</i> | Mouse myeloma cells | aa 26-253     | C-terminal His      | R&D Systems           |
| CMA1        | Chymase                                                    | 1215         | NP_001827.1              | <i>Homo sapiens</i> | Human skin          | active enzyme | none                | Enzo                  |
| CPVL        | Probable serine carboxypeptidase CPVL                      | 54504        | NP_112601.3              | <i>Homo sapiens</i> | HEK293T             | full-length   | C-terminal FLAG/His |                       |
| CTRC        | Chymotrypsin-C                                             | 514047       | NP_001092435.1           | <i>Bos taurus</i>   | Bovine pancreas     | active enzyme | none                | Promega               |
| CTSA        | Lysosomal protective protein                               | 5476         | NP_000299.2              | <i>Homo sapiens</i> | HEK293T             | full-length   | C-terminal FLAG/His |                       |
| CTSG        | Cathepsin G                                                | 1511         | NP_001902.1              | <i>Homo sapiens</i> | Human neutrophils   | active enzyme | none                | Enzo                  |
| DDHD1       | Phospholipase DDHD1                                        | 80821        | NP_085140.2              | <i>Homo sapiens</i> | HEK293T             | full-length   | C-terminal FLAG/His |                       |
| DPP4        | Dipeptidyl peptidase 4                                     | 1803         | NP_001926.2              | <i>Homo sapiens</i> | HEK293T             | full-length   | C-terminal FLAG/His |                       |
| DPP7        | Dipeptidyl peptidase 7                                     | 29952        | NP_037511.2              | <i>Homo sapiens</i> | HEK293T             | full-length   | C-terminal FLAG/His |                       |
| DPP8        | Dipeptidyl peptidase 8                                     | 54878        | NP_056911.1              | <i>Homo sapiens</i> | Insect cells        | full-length   | N-terminal His      | Enzo                  |

|                |                                                             |        |                |                          |                     |               |                        |                |
|----------------|-------------------------------------------------------------|--------|----------------|--------------------------|---------------------|---------------|------------------------|----------------|
| DPP9           | Dipeptidyl peptidase 9                                      | 91039  | NP_631898.3    | <i>Homo sapiens</i>      | HEK293T             | full-length   | C-terminal<br>FLAG/His |                |
| ELANE          | Neutrophil elastase                                         | 1991   | NP_001963.1    | <i>Homo sapiens</i>      | Human neutrophils   | active enzyme | none                   | Enzo           |
| ESD            | S-formylglutathione hydrolase                               | 2098   | NP_001975.1    | <i>Homo sapiens</i>      | E. coli             | full-length   | C-terminal<br>His/myc  |                |
| F2             | Prothrombin                                                 | 2147   | NP_000497.1    | <i>Homo sapiens</i>      | Human plasma        | active enzyme | none                   | Enzo           |
| F7             | Coagulation factor VII                                      | 2155   | NP_000122.1    | <i>Homo sapiens</i>      | Human plasma        | active enzyme | none                   | Enzo           |
| F10            | Coagulation factor X                                        | 2159   | NP_000495.1    | <i>Homo sapiens</i>      | Human plasma        | active enzyme | none                   | Enzo           |
| F11            | Coagulation factor XI                                       | 2160   | NP_000119.1    | <i>Homo sapiens</i>      | Human plasma        | active enzyme | none                   | abcam          |
| FAAH           | Fatty-acid amide hydrolase 1                                | 29347  | NP_077046.1    | <i>Rattus norvegicus</i> | E. coli             | aa 30-end     | N-terminal<br>His      |                |
| FAM108A1       | Abhydrolase domain-containing protein 17A                   | 81926  | NP_112490.3    | <i>Homo sapiens</i>      | E. coli             | aa 21-end     | C-terminal<br>His/V5   |                |
| FAM108B1       | Abhydrolase domain-containing protein 17B                   | 51104  | NP_057098.2    | <i>Homo sapiens</i>      | E. coli             | aa 20-end     | C-terminal<br>His/V5   |                |
| FAM108C1       | Abhydrolase domain-containing protein 17C                   | 58489  | NP_067037.1    | <i>Homo sapiens</i>      | HEK293T             | aa 27-end     | C-terminal<br>FLAG/His |                |
| FAP            | Seprase                                                     | 2191   | NP_004451.2    | <i>Homo sapiens</i>      | HEK293T             | full-length   | C-terminal<br>FLAG/His |                |
| GZMA           | Granzyme A                                                  | 3001   | NP_006135.1    | <i>Homo sapiens</i>      | E. coli             | full-length   | not specified          | Enzo           |
| GZMB           | Granzyme B                                                  | 3002   | NP_004122.2    | <i>Homo sapiens</i>      | E. coli             | full-length   | not specified          | Enzo           |
| HPN            | Serine protease hepsin                                      | 3249   | NP_892028.1    | <i>Homo sapiens</i>      | Schneider 2 cells   | active enzyme | C-terminal<br>His/V5   | Enzo           |
| HTRA1          | Serine protease HTRA1                                       | 56213  | NP_062510.2    | <i>Mus musculus</i>      | HEK293T             | full-length   | C-terminal<br>FLAG/His |                |
| HTRA2          | Serine protease HTRA2, mitochondrial                        | 27429  | NP_037379.1    | <i>Homo sapiens</i>      | E. coli             | aa 234-458    | C-terminal<br>His      | R&D<br>Systems |
| HTRA4          | Serine protease HTRA4                                       | 203100 | NP_710159.1    | <i>Homo sapiens</i>      | HEK293T             | full-length   | C-terminal<br>FLAG/His |                |
| IAH1           | Isoamyl acetate-hydrolyzing esterase 1 homolog              | 285148 | NP_001034702.1 | <i>Homo sapiens</i>      | E. coli             | full-length   | C-terminal<br>His/myc  |                |
| KLK1           | Kallikrein-1                                                | 3816   | NP_002248.1    | <i>Homo sapiens</i>      | Yeast               | full-length   | not specified          | Abcam          |
| KLK2           | Kallikrein-2                                                | 3817   | NP_005542.1    | <i>Homo sapiens</i>      | Mouse myeloma cells | aa 67-293     | C-terminal<br>His      | R&D<br>Systems |
| KLK5           | Kallikrein-5                                                | 25818  | NP_036559.1    | <i>Homo sapiens</i>      | Mouse myeloma cells | full-length   | C-terminal<br>His      | R&D<br>Systems |
| KLKB1          | Plasma kallikrein                                           | 3818   | NP_000883.2    | <i>Homo sapiens</i>      | Human plasma        | full-length   | none                   | Abcam          |
| LACTB          | Serine beta-lactamase-like protein LACTB, mitochondrial     | 114294 | NP_116246.2    | <i>Homo sapiens</i>      | HEK293T             | full-length   | C-terminal<br>FLAG/His |                |
| LCAT           | Group XV phospholipase A2                                   | 3931   | NP_000220.1    | <i>Homo sapiens</i>      | HEK293T             | full-length   | C-terminal<br>FLAG/His |                |
| LIPA           | Lysosomal acid lipase/cholesterol ester hydrolase           | 3988   | NP_001121077.1 | <i>Homo sapiens</i>      | HEK293T             | full-length   | C-terminal<br>FLAG/His |                |
| LIPC           | Hepatic triacylglycerol lipase                              | 3990   | NP_000227.2    | <i>Homo sapiens</i>      | HEK293T             | full-length   | C-terminal<br>FLAG/His |                |
| LIPE           | Hormone-sensitive lipase                                    | 3991   | NP_005348.2    | <i>Homo sapiens</i>      | HEK293T             | full-length   | C-terminal<br>FLAG/His |                |
| LIPF           | Gastric triacylglycerol lipase                              | 8513   | NP_001185758.1 | <i>Homo sapiens</i>      | HEK293T             | full-length   | C-terminal<br>FLAG/His |                |
| LIPG           | Endothelial lipase                                          | 9388   | NP_006024.1    | <i>Homo sapiens</i>      | HEK293T             | full-length   | C-terminal<br>FLAG/His |                |
| LPL            | Lipoprotein lipase                                          | 4023   | NP_000228.1    | <i>Homo sapiens</i>      | HEK293T             | full-length   | C-terminal<br>FLAG/His |                |
| LYPLA1         | Acyl-protein thioesterase 1                                 | 10434  | NP_006321.1    | <i>Homo sapiens</i>      | E. coli             | full-length   | N-terminal<br>His      |                |
| LYPLA1 (S119A) | Acyl-protein thioesterase 1 (S119A)                         | 10434  | NP_006321.1    | <i>Homo sapiens</i>      | E. coli             | full-length   | N-terminal<br>His      |                |
| LYPLA2         | Acyl-protein thioesterase 2                                 | 11313  | NP_009191.1    | <i>Homo sapiens</i>      | E. coli             | full-length   | C-terminal<br>His/V5   |                |
| LYPLA2 (S122A) | Acyl-protein thioesterase 2 (S122A)                         | 11313  | NP_009191.1    | <i>Homo sapiens</i>      | E. coli             | full-length   | N-terminal<br>His      |                |
| LYPLAL1        | Lysophospholipase-like protein 1                            | 127018 | NP_620149.1    | <i>Homo sapiens</i>      | E. coli             | full-length   | N-terminal<br>His      |                |
| MGLL           | Monoglyceride lipase                                        | 11343  | NP_009214.1    | <i>Homo sapiens</i>      | E. coli             | full-length   | C-terminal<br>His/myc  |                |
| OLAH           | S-acyl fatty acid synthase thioesterase, medium chain       | 55301  | NP_060794.1    | <i>Homo sapiens</i>      | E. coli             | full-length   | C-terminal<br>His/myc  |                |
| OVCA2          | Ovarian cancer-associated gene 2 protein                    | 124641 | NP_543012.1    | <i>Homo sapiens</i>      | E. coli             | full-length   | C-terminal<br>His/myc  |                |
| PAFAH1B2       | Platelet-activating factor acetylhydrolase IB subunit beta  | 5049   | NP_002563.1    | <i>Homo sapiens</i>      | E. coli             | full-length   | C-terminal<br>His/myc  |                |
| PAFAH1B3       | Platelet-activating factor acetylhydrolase IB subunit gamma | 5050   | NP_001139411.1 | <i>Homo sapiens</i>      | E. coli             | full-length   | C-terminal<br>His/myc  |                |

|               |                                                              |        |                |                     |                       |               |                     |             |
|---------------|--------------------------------------------------------------|--------|----------------|---------------------|-----------------------|---------------|---------------------|-------------|
| PCSK1         | Neuroendocrine convertase 1                                  | 5122   | NP_000430.3    | <i>Homo sapiens</i> | HEK293T               | full-length   | C-terminal FLAG/His |             |
| PCSK2         | Neuroendocrine convertase 2                                  | 5126   | NP_002585.2    | <i>Homo sapiens</i> | CHO cells             | aa 110-end    | C-terminal His      | R&D Systems |
| PLA2G15       | Group XV phospholipase A2                                    | 23659  | NP_036452.1    | <i>Homo sapiens</i> | HEK293T               | full-length   | C-terminal FLAG/His |             |
| PLA2G4A       | Cytosolic phospholipase A2                                   | 5321   | NP_077734.1    | <i>Homo sapiens</i> | Spodoptera frugiperda | full-length   | C-terminal His      | R&D Systems |
| PLA2G7        | Platelet-activating factor acetylhydrolase                   | 7941   | NP_005075.3    | <i>Homo sapiens</i> | HEK293T               | full-length   | C-terminal FLAG/His |             |
| PLAT          | Tissue-type plasminogen activator                            | 5327   | NP_000921.1    | <i>Homo sapiens</i> | HEK293T               | full-length   | C-terminal FLAG/His |             |
| PLAU          | Urokinase-type plasminogen activator                         | 5328   | NP_002649.1    | <i>Homo sapiens</i> | Mouse myeloma cells   | full-length   | C-terminal His      | R&D Systems |
| PLG           | Plasminogen                                                  | 5340   | NP_000292.1    | <i>Homo sapiens</i> | Human plasma          | active enzyme | none                | Abcam       |
| PNLIP         | Pancreatic triacylglycerol lipase                            | 5406   | NP_000927.1    | <i>Homo sapiens</i> | HEK293T               | full-length   | C-terminal FLAG/His |             |
| PNLIPRP2      | Pancreatic lipase-related protein 2                          | 5408   | NP_005387.2    | <i>Homo sapiens</i> | HEK293T               | full-length   | C-terminal FLAG/His |             |
| PNPLA2        | Patatin-like phospholipase domain-containing protein 2       | 57104  | NP_065109.1    | <i>Homo sapiens</i> | HEK293T               | full-length   | C-terminal FLAG/His |             |
| PPME1         | Protein phosphatase methyltransferase 1                      | 51400  | NP_057231.1    | <i>Homo sapiens</i> | E. coli               | full-length   | N-terminal His      |             |
| PPME1 (S156A) | Protein phosphatase methyltransferase 1 (S156A)              | 51400  | NP_057231.1    | <i>Homo sapiens</i> | E. coli               | full-length   | N-terminal His      |             |
| PPT1          | Palmitoyl-protein thioesterase 1                             | 9374   | NP_001191032.1 | <i>Homo sapiens</i> | HEK293T               | full-length   | C-terminal FLAG/His |             |
| PPT2          | Lysosomal thioesterase PPT2                                  | 9374   | NP_005146.4    | <i>Homo sapiens</i> | HEK293T               | full-length   | C-terminal FLAG/His |             |
| PRCP          | Lysosomal Pro-X carboxypeptidase                             | 5547   | NP_005031.1    | <i>Homo sapiens</i> | HEK293T               | full-length   | C-terminal FLAG/His |             |
| PREP          | Prolyl endopeptidase                                         | 5550   | NP_002717.3    | <i>Homo sapiens</i> | E. coli               | full-length   | N-terminal His      |             |
| PREPL         | Prolyl endopeptidase-like                                    | 9581   | NP_001165074.1 | <i>Homo sapiens</i> | E. coli               | full-length   | N-terminal His      |             |
| PROC          | Vitamin K-dependent protein C                                | 5624   | NP_000303.1    | <i>Homo sapiens</i> | CHO cells             | aa 43-461     |                     |             |
| PRSS1         | Trypsin-1                                                    | 615237 | NP_001107199.1 | <i>Bos taurus</i>   | Bovine                | active enzyme | none                | Promega     |
| PRSS8         | Prostasin                                                    | 5652   | NP_002764.1    | <i>Homo sapiens</i> | CHO cells             | aa 33-319     | C-terminal His      | R&D Systems |
| PRSS22        | Brain-specific serine protease 4                             | 64063  | NP_071402.1    | <i>Homo sapiens</i> | Mouse myeloma cells   | aa 33-317     | C-terminal His      | R&D Systems |
| PRSS27        | Serine protease 27                                           | 83886  | NP_114154.1    | <i>Homo sapiens</i> | Mouse myeloma cells   | aa 23-290     | C-terminal His      | R&D Systems |
| QRSL1         | Glutamyl-tRNA(Gln) amidotransferase subunit A, mitochondrial | 55278  | NP_060762.3    | <i>Homo sapiens</i> | HEK293T               | full-length   | C-terminal FLAG/His |             |
| RBBP9         | Putative hydrolase RBBP9                                     | 10741  | NP_006597.2    | <i>Homo sapiens</i> | E. coli               | full-length   | N-terminal His      |             |
| RBBP9 (S75A)  | Putative hydrolase RBBP9 (S75A)                              | 10741  | NP_006597.2    | <i>Homo sapiens</i> | E. coli               | full-length   | N-terminal His      |             |
| SCPEP1        | Retinoid-inducible serine carboxypeptidase                   | 59342  | NP_067639.1    | <i>Homo sapiens</i> | HEK293T               | full-length   | C-terminal FLAG/His |             |
| SIAE          | Sialate O-acetyltransferase                                  | 54414  | NP_733746.1    | <i>Homo sapiens</i> | HEK293T               | full-length   | C-terminal FLAG/His |             |
| ST14          | Suppressor of tumorigenicity 14 protein                      | 6768   | NP_068813.1    | <i>Homo sapiens</i> | E. coli               | aa 596-855    | N-terminal His      | R&D Systems |
| TMPRSS11D     | Transmembrane protease serine 11D                            | 9407   | NP_004253.1    | <i>Homo sapiens</i> | Mouse myeloma cells   | aa 72-418     | N-terminal His      | R&D Systems |
| TPP2          | Tripeptidyl-peptidase 2                                      | 7174   | NP_003282.2    | <i>Homo sapiens</i> | HEK293T               | full-length   | C-terminal FLAG/His |             |

**Supplementary Table 3** 55 widely used inhibitors profiled in this study. These compounds were obtained from the indicated source and used without further confirmation of their purity or specific activity.

| Inhibitor                                                       | Source                      | Structure                                                                            | Primary Target(s)                                    |
|-----------------------------------------------------------------|-----------------------------|--------------------------------------------------------------------------------------|------------------------------------------------------|
| 1,5-Dansyl-Glu-Gly-Arg chloromethyl ketone (1,5-Dansyl-EGR-CMK) | CalBioChem                  | 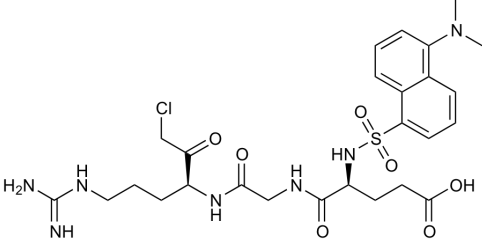   | PLAU, FXa                                            |
| ABL127                                                          | Sigma                       |     | PME1                                                 |
| Ada-(Ahx) <sub>3</sub> -(Leu) <sub>3</sub> -vinyl sulfone       | Enzo                        |   | 20S proteasome                                       |
| AEBSF                                                           | Sigma                       |   | pan-serine protease inhibitor                        |
| Ala-boroPro                                                     | W. Bachovchin (Tufts Univ.) |   | Dipeptidyl peptidases                                |
| Antipain                                                        | Santa Cruz                  |  | many serine and cysteine proteases                   |
| Arachidonyl trifluoromethyl ketone (Arachidonyl TFMK)           | Cayman Chemical             |  | Cytosolic and calcium-independent PLA2 enzymes, FAAH |
| Argatroban                                                      | Sigma                       |  | Thrombin                                             |

|                                     |                 |                                                                                      |                                                   |
|-------------------------------------|-----------------|--------------------------------------------------------------------------------------|---------------------------------------------------|
| Boceprevir<br>(Victrelis)           | TRC             | 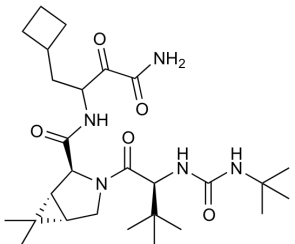   | HCV NS3 protease                                  |
| Bortezomib<br>(Velcade)             | LC Laboratories |    | 20S proteasome                                    |
| Bromo-enol lactone<br>(BEL)         | Cayman Chemical |     | Calcium-independent PLA2<br>enzymes, chymotrypsin |
| (R)-bromo-enol lactone<br>[(R)-BEL] | Cayman Chemical |    | Calcium-independent PLA2<br>enzymes               |
| (S)-bromo-enol lactone<br>[(S)-BEL] | Cayman Chemical |   | Calcium-independent PLA2<br>enzymes               |
| C75                                 | Cayman Chemical |  | FASN                                              |
| Carfilzomib<br>(Kyprolis)           | ChemieTek       |  | 20S proteasome                                    |
| Cerulenin                           | Cayman Chemical |  | FASN                                              |

|                                                                                                                   |                 |                                                                                      |                                                                  |
|-------------------------------------------------------------------------------------------------------------------|-----------------|--------------------------------------------------------------------------------------|------------------------------------------------------------------|
| Chymostatin                                                                                                       | Santa Cruz      | 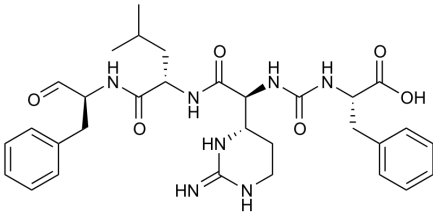   | Chymotrypsin-like serine proteases, chymases, cysteine proteases |
| Clasto-Lactacystin $\beta$ -lactone<br>(active metabolite of lactacystin; also called $\beta$ -clastolactacystin) | Cayman Chemical |     | 20S proteasome                                                   |
| Dabigatran<br>(active metabolite of Pradaxa)                                                                      | TRC             |    | Thrombin                                                         |
| Donepezil<br>(Aricept)                                                                                            | Selleckchem     |    | ACHE                                                             |
| Emetine                                                                                                           | Sigma           |   | RBBP9<br>(also inhibits translation <i>via</i> unknown target)   |
| Epoxomicin                                                                                                        | Sigma           |  | 20S proteasome                                                   |
| FKGK11                                                                                                            | Cayman Chemical |   | Calcium-independent phospholipases                               |
| Gabexate mesylate                                                                                                 | Enzo            |  | Trypsin, thrombin, PLAU, PLG, FXa                                |
| JP104                                                                                                             | Cayman          |  | FAAH                                                             |
| JP83                                                                                                              | Cayman Chemical |  | FAAH                                                             |

|                                                      |                        |                                                                                      |                                |
|------------------------------------------------------|------------------------|--------------------------------------------------------------------------------------|--------------------------------|
| JW480                                                | Cayman Chemical        | 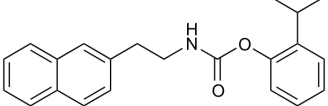   | NCEH1                          |
| JW642                                                | Cayman Chemical        |    | MGLL                           |
| JZL195                                               | Cayman Chemical        |    | MGLL, FAAH                     |
| K579                                                 | Santa Cruz             |    | DPP4                           |
| KML29                                                | Cayman Chemical        |    | MGLL                           |
| MAFP                                                 | Cayman Chemical        |   | pan-serine hydrolase inhibitor |
| Melagatran<br>(active metabolite of<br>Ximelagatran) | Santa Cruz             |  | Thrombin                       |
| MG-132                                               | Peptides International |  | 20S proteasome                 |
| N-arachidonyl maleimide<br>(NAM)                     | Santa cruz             |  | MGLL                           |



|                                                       |                    |                                                                                      |                                                   |
|-------------------------------------------------------|--------------------|--------------------------------------------------------------------------------------|---------------------------------------------------|
| Orlistat<br>(Xenical/Alli)                            | Cayman<br>Chemical | 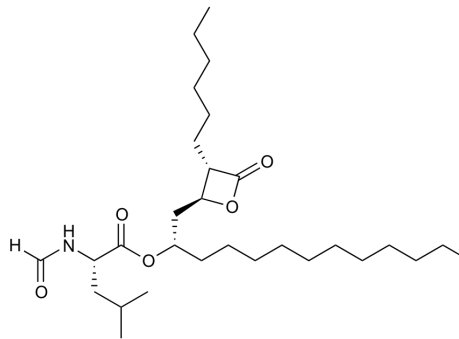   | Gastric/pancreatic lipases                        |
| Palmityl trifluoromethyl<br>ketone<br>(Palmityl TFMK) | Cayman<br>Chemical |    | Calcium-independent and<br>cytosolic PLA2 enzymes |
| PF-3845                                               | Cayman<br>Chemical |    | FAAH                                              |
| Phenylmethanesulfonyl<br>fluoride<br>(PMSF)           | Sigma              |     | pan-serine protease inhibitor                     |
| Physostigmine                                         | Enzo               |    | ACHE, BCHE                                        |
| PPACK                                                 | Santa Cruz         |   | Thrombin                                          |
| RHC 80267                                             | Sigma              |  | DAG lipases                                       |
| Rivaroxaban<br>(Xarelto)                              | Fisher             |  | Factor Xa                                         |
| S17092                                                | Sigma              |  | PREP                                              |

|                                |                                |                                                                                      |                               |
|--------------------------------|--------------------------------|--------------------------------------------------------------------------------------|-------------------------------|
| Saxagliptin<br>(Onglyza)       | TRC                            | 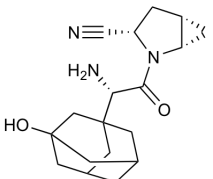    | DPP4                          |
| Sitagliptin<br>(Januvia)       | Sigma                          |    | DPP4                          |
| Telaprevir<br>(Incivek/Incivo) | Selleckchem                    |    | HCV NS3 protease              |
| TLCK                           | Cayman<br>Chemical             |    | Trypsin-like serine proteases |
| UCF-101                        | Calbiochem                     |   | HTRA2                         |
| URB597                         | Cayman<br>Chemical             |  | FAAH                          |
| Val-boroPro<br>(Talabostat)    | W. Bachovchin<br>(Tufts Univ.) |   | Dipeptidyl peptidases         |
| Vildagliptin<br>(Zomelis)      | TSZ Chem                       |   | DPP4                          |
| WWL70                          | Cayman<br>Chemical             |  | ABHD6                         |
| Z-AAD-CMK                      | Calbiochem                     |  | GZMB                          |

Z-prolyl-prolinal

Santa Cruz

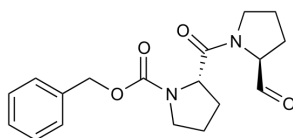

PREP

---

**Supplementary Table 4** Comparison of IC<sub>50</sub> values determined by EnPlex with published values. An asterisk (\*) indicates that enzymes from different species were used to obtain the two values shown. Because the lowest dose evaluated by EnPlex was 5 nM, compounds inhibiting enzyme activity > 50% at that dose were assigned a value of “< 5”.

| Compound                | Enzyme        | IC <sub>50</sub> | Published IC <sub>50</sub> /K <sub>i</sub> /K <sub>d</sub> (nM) | Reference |
|-------------------------|---------------|------------------|-----------------------------------------------------------------|-----------|
| ABL127                  | PME1          | 12.2             | 4.2                                                             | 1         |
| Ala-boroPro             | DPP4          | <5               | 2                                                               | 2         |
| Ala-boroPro             | DPP8          | 1034             | 13                                                              | 3         |
| Ala-boroPro             | DPP9          | 189.1            | 2.8                                                             | 3         |
| Antipain                | Trypsin       | 187.8            | 430                                                             | 4         |
| Antipain                | Plasmin       | 8167             | 6600                                                            | 5         |
| Arachidonyl TFMK        | FAAH          | 3984             | 550                                                             | 6         |
| Arachidonyl TFMK        | MGLL*         | 267.7            | 2900                                                            | 6         |
| Boceprevir              | CMA1          | 4517             | 32                                                              | 7         |
| Argatroban              | Thrombin      | <5               | 12                                                              | 8         |
| Bortezomib              | CMA1          | 4650             | 280                                                             | 9         |
| Bortezomib              | DPP7          | 8512             | 8700                                                            | 9         |
| Chymostatin             | Chymotrypsin* | 128.8            | 94                                                              | 10        |
| Chymostatin             | CMA1          | 1085             | 420                                                             | 10        |
| Dabigatran              | Thrombin      | <5               | 4.5                                                             | 11        |
| Dabigatran              | FXa           | 28109            | 3760                                                            | 11        |
| Dabigatran              | Trypsin*      | 1611             | 50.3                                                            | 11        |
| Donepezil               | ACHE*         | 278.6            | 5.7                                                             | 12        |
| Emetine                 | RBBP9         | 6008             | 7800                                                            | 13        |
| Gabexate                | PLAU          | 1348             | 1300                                                            | 14        |
| Gabexate                | PLG           | 364.4            | 1600                                                            | 15        |
| Gabexate                | KLKB1         | 488.2            | 200                                                             | 15        |
| Gabexate                | Thrombin      | 1487             | 970                                                             | 15        |
| JP104                   | FAAH          | < 5              | 7.3                                                             | 16        |
| JP83                    | FAAH          | < 5              | 1.6                                                             | 16        |
| JW642                   | MGLL          | 53.7             | 3.7                                                             | 17        |
| JW642                   | FAAH          | 4742             | 14000                                                           | 17        |
| JW642                   | ABHD6*        | 51.3             | 107                                                             | 17        |
| JZL195                  | MGLL*         | 350.8            | 19                                                              | 18        |
| JZL195                  | FAAH*         | 12.1             | 13                                                              | 18        |
| JZL195                  | ABHD6*        | 55               | 50                                                              | 18        |
| K579                    | DPP4          | < 5              | 5                                                               | 19        |
| KML29                   | MGLL          | 22               | 5.9                                                             | 17        |
| MAFP                    | FAAH          | 5.1              | 2.5                                                             | 20        |
| Melagatran              | Thrombin      | < 5              | 2                                                               | 21        |
| Melagatran              | Trypsin*      | 15.75            | 4                                                               | 22        |
| Melagatran              | PLG           | 2874             | 1400                                                            | 22        |
| Melagatran              | KLKB1         | 363              | 690                                                             | 22        |
| Melagatran              | FXa           | 2398             | 9400                                                            | 22        |
| N-arachidonyl maleimide | MGLL          | 194.1            | 140                                                             | 23        |
| Orlistat                | PLA2G7        | 260              | 50                                                              | 24        |
| Palmityl TFMK           | FAAH          | 3967             | 73                                                              | 6         |
| PPACK                   | Thrombin      | <5               | 18                                                              | 25        |
| PF-3845                 | FAAH          | <5               | 18                                                              | 26        |
| Physostigmine           | ACHE*         | 1236             | 70                                                              | 27        |
| Physostigmine           | BCHE          | 5                | 35                                                              | 27        |
| RHC 80267               | PLA2G7        | 7438.5           | 23000                                                           | 24        |

|                   |        |       |       |    |
|-------------------|--------|-------|-------|----|
| RHC 80267         | FAAH   | 8106  | 10000 | 24 |
| Rivaroxaban       | FXa    | <5    | 0.7   | 28 |
| S17092            | PREP   | <5    | 0.9   | 29 |
| Saxagliptin       | DPP4   | <5    | 1.3   | 30 |
| Saxagliptin       | DPP8   | 5323  | 508   | 30 |
| Saxagliptin       | DPP9   | 583.9 | 98    | 30 |
| Sitagliptin       | DPP4   | 7.1   | 18    | 30 |
| Telaprevir        | CMA1   | 725.2 | 26    | 7  |
| Telaprevir        | CELA1  | 221.8 | 30    | 7  |
| URB597            | FAAH   | 27.98 | 45    | 16 |
| Val-boroPro       | DPP4   | <5    | 0.18  | 31 |
| Val-boroPro       | DPP8   | <5    | 1.5   | 31 |
| Val-boroPro       | DPP9   | <5    | 0.76  | 31 |
| Vildagliptin      | DPP4   | <5    | 13    | 30 |
| Vildagliptin      | DPP9   | 219.2 | 258   | 30 |
| WWL70             | ABHD6* | 25.23 | 70    | 32 |
| Z-prolyl-prolinal | PREP   | <5    | 14    | 33 |

**Supplementary Table 5** The serine hydrolase targets of bortezomib. An asterisk (\*) indicates that enzymes from different species were used to obtain the two values shown. Published values are from ref. 9. New targets were defined as enzymes inhibited >40% at 33  $\mu$ M in the EnPlex assay. ND, not determined.

|                            | Enzyme        | Initial Target Identification Method | Published values            |                              | EnPlex                      |                              |
|----------------------------|---------------|--------------------------------------|-----------------------------|------------------------------|-----------------------------|------------------------------|
|                            |               |                                      | IC <sub>50</sub> ( $\mu$ M) | % inhibition (at 10 $\mu$ M) | IC <sub>50</sub> ( $\mu$ M) | % inhibition (at 33 $\mu$ M) |
| Previously known targets   | Chymotrypsin* | Enzyme panel                         | ND                          | 95                           | > 33                        | 53                           |
|                            | CMA1          | Enzyme panel                         | 0.28                        | 95                           | 4.7                         | 84.2                         |
|                            | CTSA          | MS-ABPP                              | 2.5                         | ND                           | > 33                        | 32.4                         |
|                            | CTSG          | Enzyme panel; MS-ABPP                | 0.95                        | 95                           | 36                          | 61.8                         |
|                            | DPP7          | MS-ABPP                              | 8.7                         | ND                           | 8.5                         | 78.7                         |
|                            | ELANE         | Enzyme panel                         | ND                          | 40                           | > 33                        | 36.1                         |
|                            | HTRA2         | <i>In silico</i> database mining     | 0.003                       | ND                           | > 33                        | < 5                          |
| Previously unknown targets | C1R           | EnPlex                               | -                           | -                            | >33                         | 44.5                         |
|                            | FXa           | EnPlex                               | -                           | -                            | >33                         | 48.8                         |
|                            | GZMA          | EnPlex                               | -                           | -                            | 11.9                        | 72.4                         |
|                            | KLKB1         | EnPlex                               | -                           | -                            | 2.0                         | 94.2                         |
|                            | PRCP          | EnPlex                               | -                           | -                            | 12.4                        | 77.9                         |
|                            | PRSS22        | EnPlex                               | -                           | -                            | >33                         | 44.4                         |
|                            | ST14          | EnPlex                               | -                           | -                            | >33                         | 51.5                         |

**Supplementary Table 6** Numbers, names, structures, and chemical characterization of the boronic acid and nitrile library. The compound number (left column) corresponds to the compound numbers in **Figure 5** and **Supplementary Figure 8**.

| Compound Number | Compound Name      | Compound Structure                                                                  | Characterization or Reference                                                                                                                                                                                                                                                                                                                                                                                                                                                                |
|-----------------|--------------------|-------------------------------------------------------------------------------------|----------------------------------------------------------------------------------------------------------------------------------------------------------------------------------------------------------------------------------------------------------------------------------------------------------------------------------------------------------------------------------------------------------------------------------------------------------------------------------------------|
| 1               | Aad(Lys-boroMet)   | 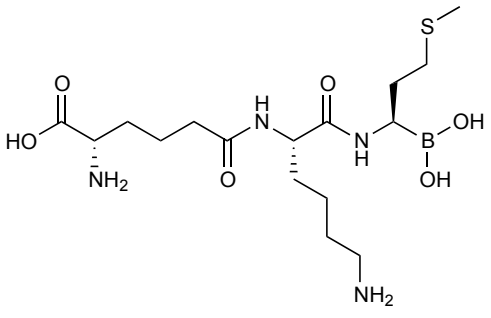  | <sup>1</sup> H NMR (D <sub>2</sub> O) δ 4.44 (dd, <i>J</i> = 8.2, 6.2 Hz, 1H), 3.91 (dd, <i>J</i> = 6.1, 5.8 Hz, 1H), 3.01 (dd, <i>J</i> = 7.8, 7.1 Hz, 2H), 2.75 (t, <i>J</i> = 7.8 Hz, 1H), 2.58 (t, <i>J</i> = 7.3 Hz, 2H), 2.41 (t, <i>J</i> = 7.2 Hz, 2H), 2.12 (s, 3H), 2.00 - 1.60 (m, 10H), 1.50 - 1.40 (m, 2H). MS (ESI <sup>+</sup> ) <i>m/z</i> (rel intensity): 202.1 ([[M - H <sub>2</sub> O]/2 + H] <sup>+</sup> , 100), 403.3 ([M - H <sub>2</sub> O + H] <sup>+</sup> , 60). |
| 2               | Abu-boroSar        |    | <sup>1</sup> H NMR (D <sub>2</sub> O) δ 4.79 (t, <i>J</i> = 6.6 Hz, 1H), 3.21 (s, 3H), 2.53 (s, 2H), 2.01 - 1.96 (m, 2H), 1.03 (t, <i>J</i> = 7.5 Hz, 3H). <sup>13</sup> C NMR (D <sub>2</sub> O) δ 174.39, 47.50, 47.01, 38.44, 17.57. MS (ESI <sup>+</sup> ) <i>m/z</i> (rel intensity): 157.2 ([M - H <sub>2</sub> O + H] <sup>+</sup> , 100).                                                                                                                                            |
| 3               | Abu-Pro-CN         |  | <sup>1</sup> H NMR (D <sub>2</sub> O) δ 4.86 (dd, <i>J</i> = 7.5, 5.4 Hz, 1H), 4.32 (t, <i>J</i> = 6.0 Hz, 1H), 3.79 - 3.65 (m, 2H), 2.42 - 2.33 (m, 2H), 2.25 - 2.13 (m, 2H), 2.05 - 1.96 (m, 2H), 1.05 (t, <i>J</i> = 7.5 Hz, 3H). MS (ESI <sup>+</sup> ) <i>m/z</i> (rel intensity): 182.1 ([M + H] <sup>+</sup> , 100).                                                                                                                                                                  |
| 4               | Ac-Ala-Lys-boroMet |  | <sup>1</sup> H NMR (D <sub>2</sub> O) δ 4.46 (dd, <i>J</i> = 8.7, 6.0 Hz, 1H), 4.24 (q, <i>J</i> = 4.8 Hz, 1H), 2.99 (t, <i>J</i> = 7.5 Hz, 2H), 2.76 (m, 1H), 2.55 (t, <i>J</i> = 7.4 Hz, 2H), 2.10 (s, 3H), 2.01 (s, 3H), 1.67 - 1.85 (m, 6H), 1.44 - 1.47 (m, 2H), 1.37 (d, <i>J</i> = 7.2 Hz, 1H). MS (ESI <sup>+</sup> ) <i>m/z</i> (rel intensity): 373.1 ([M - H <sub>2</sub> O + H] <sup>+</sup> , 100).                                                                             |

|   |                            |                                                                                     |                                                                                                                                                                                                                                                                                                                                                                                                                                                                                                                                                |
|---|----------------------------|-------------------------------------------------------------------------------------|------------------------------------------------------------------------------------------------------------------------------------------------------------------------------------------------------------------------------------------------------------------------------------------------------------------------------------------------------------------------------------------------------------------------------------------------------------------------------------------------------------------------------------------------|
| 5 | Ac-Ala(1-naph)-Lys-boroLeu | 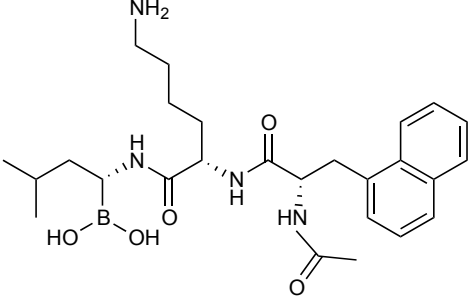  | <sup>1</sup> H NMR (D <sub>2</sub> O) δ 8.10 (d, <i>J</i> = 7.8 Hz, 1H), 8.0 (d, <i>J</i> = 7.3 Hz, 1H), 7.91 (d, <i>J</i> = 8.0 Hz, 1H), 7.65 - 7.42 (m, 4H), 4.67 (m, 1H), 4.31 (dd, <i>J</i> = 8.3, 6.2 Hz, 1H), 3.60 - 3.50 (m, 2H), 2.92 (t, <i>J</i> = 7.5 Hz, 2H), 2.63 (t, <i>J</i> = 8.1 Hz, 1H), 1.94 (s, 3H), 1.62 - 1.51 (m, 5H), 1.33 - 1.24 (m, 4H), 0.92 (d, <i>J</i> = 4.1 Hz, 3H), 0.90 (d, <i>J</i> = 4.0 Hz, 3H). MS (ESI <sup>+</sup> ) <i>m/z</i> (rel intensity): 481.3 ([M - H <sub>2</sub> O + H] <sup>+</sup> , 100). |
| 6 | Ac-Ala(1-naph)-Pro-CN      |    | <sup>1</sup> H NMR (D <sub>2</sub> O) δ 8.21 (d, <i>J</i> = 8.3 Hz, 1H), 8.01 (d, <i>J</i> = 8.0 Hz, 1H), 7.94 (d, <i>J</i> = 8.3 Hz, 1H), 7.77 - 7.59 (m, 2H), 7.51 - 7.40 (m, 2H), 5.00 - 4.80 (m, 1H), 4.65 - 4.60 (m, 1H), 3.78 (dd, <i>J</i> = 13.1, 4.9 Hz, 1H), 3.39 (t, <i>J</i> = 11.1 Hz, 2H), 3.20 (dd, <i>J</i> = 16.8, 8.0 Hz, 1H), 2.02 - 1.90 (m, 5H), 1.71 - 1.60 (m, 1H), 1.41 - 1.34 (m, 1H). MS (ESI <sup>+</sup> ) <i>m/z</i> (rel intensity): 358.1 ([M + Na] <sup>+</sup> , 71), 336.1 ([M + H] <sup>+</sup> , 100).     |
| 7 | Ac-His-Lys-boroMet         |  | <sup>1</sup> H NMR (D <sub>2</sub> O) δ 8.63 (s, 1H), 7.31 (s, 1H), 4.67 (dd, <i>J</i> = 7.5, 6.6 Hz, 1H), 4.44 (dd, <i>J</i> = 8.1, 6.6 Hz, 1H), 3.42 - 3.15 (m, 3H), 2.98 (t, <i>J</i> = 7.6 Hz, 3H), 2.80 - 2.60 (m, 2H), 2.55 (t, <i>J</i> = 7.2 Hz, 2H), 2.10 (s, 3H), 1.99 (s, 3H), 1.98 (br, 1H), 1.84 - 1.68 (m, 8H), 1.50 - 1.30 (m, 4H). MS (ESI <sup>+</sup> ) <i>m/z</i> (rel intensity): 439.2 ([M - H <sub>2</sub> O + H] <sup>+</sup> , 100).                                                                                   |
| 8 | Ac-Pro-Lys-boroLeu         |  | <sup>1</sup> H NMR (D <sub>2</sub> O) δ 4.46 - 4.35 (m, 2H), 3.64 (t, <i>J</i> = 6.6 Hz, 2H), 3.0 (dd, <i>J</i> = 7.4, 7.0 Hz, 1H), 2.77 (dd, <i>J</i> = 9.0, 6.3 Hz, 1H), 2.34 - 2.29 (m, 1H), 2.11 (s, 3H), 2.00 - 1.30 (m, 15H), 0.90 (d, <i>J</i> = 3.9 Hz, 3H), 0.88 (d, <i>J</i> = 3.7 Hz, 3H). MS (ESI <sup>+</sup> ) <i>m/z</i> (rel intensity): 381.2 ([M - H <sub>2</sub> O + H] <sup>+</sup> , 100).                                                                                                                                |



|    |                    |                                                                                     |                                                                                                                                                                                                                                                                                                                                                                                                                    |
|----|--------------------|-------------------------------------------------------------------------------------|--------------------------------------------------------------------------------------------------------------------------------------------------------------------------------------------------------------------------------------------------------------------------------------------------------------------------------------------------------------------------------------------------------------------|
| 9  | Ac-Pro-Lys-boroMet | 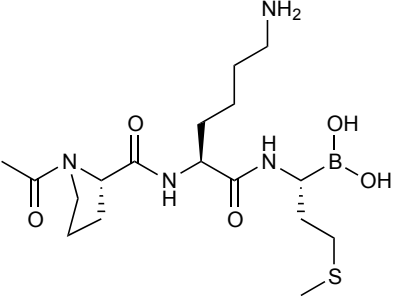   | <sup>1</sup> H NMR (D <sub>2</sub> O) δ 4.48 - 4.43 (m, 1H), 4.40 - 4.35(m, 1H), 3.64 (t, <i>J</i> = 6.6 Hz, 2H), 3.0 (t, <i>J</i> = 7.3Hz, 2H), 2.78 - 2.73 (m, 1H), 2.55 (dd, <i>J</i> = 7.5, 7.2 Hz, 2H), 2.35 - 2.25 (m, 1H), 2.11 (s, 3H), 2.09 (s, 3H), 2.00 - 1.64 (m, 10H), 1.55 - 1.35 (m, 2H). MS (ESI <sup>+</sup> ) <i>m/z</i> (rel intensity): 399.2 ([M - H <sub>2</sub> O + H] <sup>+</sup> , 100). |
| 10 | Aib-boroAla        |    | <sup>1</sup> H NMR (D <sub>2</sub> O) δ 2.78 (q, <i>J</i> = 7.4 Hz, 1H), 1.56 (s, 3H), 1.55 (s, 3H), 1.08 (d, <i>J</i> = 7.4 Hz, 3H). MS (ESI <sup>+</sup> ) <i>m/z</i> (rel intensity): 313.2 ([2 × (M - H <sub>2</sub> O) + H] <sup>+</sup> , 100), 157.3 ([M - H <sub>2</sub> O + H] <sup>+</sup> , 18).                                                                                                        |
| 11 | Aib-boroGly        |    | <sup>1</sup> H NMR (D <sub>2</sub> O) 2.68 (s, 2H), 1.59 (s, 6H). MS (ESI <sup>+</sup> ) <i>m/z</i> , (rel Intensity): 143.2 ([M - H <sub>2</sub> O + H] <sup>+</sup> , 70), 285.2 ([2 × (M - H <sub>2</sub> O) + H] <sup>+</sup> , 100).                                                                                                                                                                          |
| 12 | Aib-boroLeu        |   | <sup>1</sup> H NMR (D <sub>2</sub> O) δ 2.93 (dd, <i>J</i> = 8.0, 7.4 Hz, 1H), 1.60 (s, 6H), 1.50 (m, 1H), 1.45 - 1.30 (m, 2H), 0.90 (t, <i>J</i> = 4.2 Hz, 3H). MS (ESI <sup>+</sup> ) <i>m/z</i> (rel intensity): 199.2 ([M - H <sub>2</sub> O + H] <sup>+</sup> , 100), 397.3 ([2 × (M - H <sub>2</sub> O) + H] <sup>+</sup> , 50).                                                                             |
| 13 | Aib-boroNva        |  | <sup>1</sup> H NMR (D <sub>2</sub> O): δ 2.83 (t, <i>J</i> = 7.5 Hz, 1H), 1.63 (s, 6H), 1.56 - 1.47 (m, 2H), 1.40 - 1.28 (m, 2H), 0.90 (t, <i>J</i> = 7.2 Hz, 3H). MS (ESI <sup>+</sup> ) <i>m/z</i> (rel intensity): 553.4 ([3 × (M - H <sub>2</sub> O) + H] <sup>+</sup> , 4), 369.3 ([2 × (M - H <sub>2</sub> O) + H] <sup>+</sup> , 100), 185.2 ([M - H <sub>2</sub> O + H] <sup>+</sup> , 16).                |
| 14 | Aib-boroPhe        |  | <sup>1</sup> H NMR (D <sub>2</sub> O) δ 7.55 - 7.25 (m, 5H), 3.42 - 3.35 (m, 1H), 3.30 - 3.14 (dd, <i>J</i> = 10.2, 5.9 Hz, 1H), 2.98 (dd, <i>J</i> = 13.7, 5.9 Hz, 1H), 2.80 (dd, <i>J</i> = 13.7, 10.2 Hz, 1H), 1.55 (s, 3H), 1.50 (s, 3H). MS (ESI <sup>+</sup> ) <i>m/z</i> , (rel Intensity): 245.1 ([M - H <sub>2</sub> O + H] <sup>+</sup> , 100), 263.1 ([M + H] <sup>+</sup> , 40).                       |
| 15 | Aib-boroPro        |  | 34                                                                                                                                                                                                                                                                                                                                                                                                                 |

|    |             |  |                                                                                                                                                                                                                                                                                                                                                            |
|----|-------------|--|------------------------------------------------------------------------------------------------------------------------------------------------------------------------------------------------------------------------------------------------------------------------------------------------------------------------------------------------------------|
| 16 | Aib-boroSar |  | $^1\text{H NMR (D}_2\text{O)}$ $\delta$ 3.31 (s, 3H), 2.57 (s, 2H), 1.76 (s, 6H). $^{13}\text{C NMR (D}_2\text{O)}$ $\delta$ 175.92, 57.79, 50.89, 40.09, 24.64. MS (ESI $^+$ ) $m/z$ (rel intensity): 157.1 ([M - H $_2$ O + H] $^+$ , 100).                                                                                                              |
| 17 | Aib-Pro-CN  |  | $^1\text{H NMR (D}_2\text{O)}$ : $\delta$ 3.93 - 3.85 (m, 2H), 3.78 - 3.69 (m, 1H), 2.34 - 2.14 (m, 4H), 1.73 (s, 3H), 1.69 (s, 3H). MS (ESI $^+$ ) $m/z$ (rel intensity): 182.1 ([M + H] $^+$ , 100).                                                                                                                                                     |
| 18 | Ala-boroAla |  | $^1\text{H NMR (D}_2\text{O)}$ $\delta$ 4.10 (q, $J$ = 6.4 Hz, 1H), 2.92 (q, $J$ = 7.5 Hz, 1H), 1.53 (d, $J$ = 6.4 Hz, 3H), 1.16 (d, $J$ = 7.5 Hz, 3H). MS (ESI $^+$ ) $m/z$ (rel intensity): 285.2 ([2 $\times$ (M - H $_2$ O) + H] $^+$ , 100), 143.2 ([M - H $_2$ O + H] $^+$ , 26).                                                                    |
| 19 | Ala-boroGly |  | $^1\text{H NMR (D}_2\text{O)}$ : $\delta$ 4.06 (q, $J$ = 6.9 Hz, 1H), 2.78 (d, $J$ = 16.9 Hz, 1H), 2.70 (d, $J$ = 16.9 Hz, 1H), 1.50 (d, $J$ = 6.9 Hz, 3H). MS (ESI $^+$ ) $m/z$ (rel intensity): 257.1 ([2 $\times$ (M - H $_2$ O) + H] $^+$ , 100), 129.1 ([M - H $_2$ O + H] $^+$ , 73).                                                                |
| 20 | Ala-boroLeu |  | 35                                                                                                                                                                                                                                                                                                                                                         |
| 21 | Ala-boroNva |  | $^1\text{H NMR (D}_2\text{O)}$ : $\delta$ 4.08 (q, $J$ = 7.1 Hz, 1H), 2.86 (t, $J$ = 7.5 Hz, 1H), 1.56 - 1.48 (m, 5H), 1.37 - 1.26 (m, 2H), 0.88 (t, $J$ = 7.2 Hz, 3H). MS (ESI $^+$ ) $m/z$ (rel intensity): 511.3 ([3 $\times$ (M - H $_2$ O) + H] $^+$ , 32), 341.2 ([2 $\times$ (M - H $_2$ O) + H] $^+$ , 100), 171.1 ([M - H $_2$ O + H] $^+$ , 38). |
| 22 | Ala-boroPhe |  | $^1\text{H NMR (D}_2\text{O)}$ $\delta$ 7.55 - 7.25 (m, 5H), 4.0 (q, $J$ = 7.0 Hz, 1H), 3.42 - 3.35 (m, 1H), 3.00 - 2.90 (m, 1H), 2.85 - 2.60 (m, 1H), 1.44 (d, $J$ = 7.0 Hz, 3H). MS (ESI $^+$ ) $m/z$ (rel Intensity): 219.1 ([M - H $_2$ O + H] $^+$ , 100), 437.2 ([2 $\times$ (M - H $_2$ O) + H] $^+$ , 40).                                         |

|    |                                        |                                                                                     |                                                                                                                                                                                                                                                                                                                                                                                                                      |
|----|----------------------------------------|-------------------------------------------------------------------------------------|----------------------------------------------------------------------------------------------------------------------------------------------------------------------------------------------------------------------------------------------------------------------------------------------------------------------------------------------------------------------------------------------------------------------|
| 23 | Ala-boroPro                            | 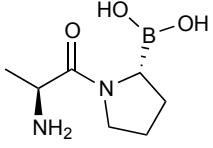   | 34                                                                                                                                                                                                                                                                                                                                                                                                                   |
| 24 | Ala-boroPro<br>thioamide<br>(ARI-2243) |    | See <b>Supplementary Note 2</b>                                                                                                                                                                                                                                                                                                                                                                                      |
| 25 | Ala-boroSar                            |    | <sup>1</sup> H NMR (D <sub>2</sub> O) δ 4.63 (q, <i>J</i> = 6.4 Hz, 1H), 3.19 (s, 3H), 2.53 (s, 2H), 1.56 (d, <i>J</i> = 6.4 Hz, 3H). <sup>13</sup> C NMR (D <sub>2</sub> O) δ 174.39, 47.01, 38.44, 17.57. MS (ESI <sup>+</sup> ) <i>m/z</i> (rel intensity): 143.1 ([M - H <sub>2</sub> O + H] <sup>+</sup> , 100).                                                                                                |
| 26 | Ala-boroSar<br>thioamide               |    | <sup>1</sup> H NMR (D <sub>2</sub> O) δ 4.69 (q, <i>J</i> = 6.7 Hz, 1H), 3.50 - 3.30 (m, 5H), 1.48 (d, <i>J</i> = 6.7 Hz, 3H). <sup>13</sup> C NMR (D <sub>2</sub> O) δ 197.77, 53.23, 51.94, 44.72, 20.30. MS (ESI <sup>+</sup> ) <i>m/z</i> (rel intensity): 317.1 ([2 × (M - H <sub>2</sub> O) + H] <sup>+</sup> , 25), 177.1 ([M + H] <sup>+</sup> , 52), 159.0 ([M - H <sub>2</sub> O + H] <sup>+</sup> , 100). |
| 27 | Ala-Pro-CN                             |  | 36                                                                                                                                                                                                                                                                                                                                                                                                                   |
| 28 | Ala(1-naph)-<br>boroAla                |  | <sup>1</sup> H NMR (D <sub>2</sub> O) δ 8.07 - 7.93 (m, 3H), 7.66 - 7.47 (m, 4H), 4.28 (dd, <i>J</i> = 6.6, 9.4 Hz, 1H), 3.75 - 3.59 (m, 2H), 2.61 (q, <i>J</i> = 7.5 Hz, 1H), 0.75 (d, <i>J</i> = 7.5 Hz, 3H). MS (ESI <sup>+</sup> ) <i>m/z</i> (rel intensity): 537.3 ([2 × (M - H <sub>2</sub> O) + H] <sup>+</sup> , 25), 269.2 ([M - H <sub>2</sub> O + H] <sup>+</sup> , 100).                                |
| 29 | Ala(1-naph)-<br>boroGly                |  | <sup>1</sup> H NMR (D <sub>2</sub> O) δ 8.07 - 7.93 (m, 3H), 7.71 - 7.45 (m, 4H), 4.29 (dd, <i>J</i> = 8.4, 7.1 Hz, 1H), 3.73 - 3.60 (m, 2H), 2.51 (d, <i>J</i> = 17.0 Hz, 1H), 2.31 (d, <i>J</i> = 17.0 Hz, 1H). MS (ESI <sup>+</sup> ) <i>m/z</i> (rel Intensity): 255.1 ([M - H <sub>2</sub> O + H] <sup>+</sup> , 100), 273.2 ([M + H] <sup>+</sup> , 40).                                                       |

|    |                     |                                                                                     |                                                                                                                                                                                                                                                                                                                                                                                                                                                                                                                                                             |
|----|---------------------|-------------------------------------------------------------------------------------|-------------------------------------------------------------------------------------------------------------------------------------------------------------------------------------------------------------------------------------------------------------------------------------------------------------------------------------------------------------------------------------------------------------------------------------------------------------------------------------------------------------------------------------------------------------|
| 30 | Ala(1-naph)-boroLeu | 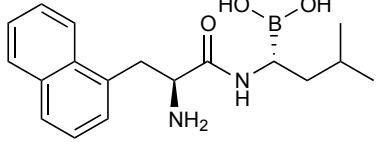   | <sup>1</sup> H NMR (D <sub>2</sub> O) δ 8.02 -7.80 (m, 3H), 7.62 - 7.38 (m, 4H), 4.33 (dd, <i>J</i> = 10.5, 6.0 Hz, 1H), 3.72 (dd, <i>J</i> = 13.8, 6.0 Hz, 1H), 3.55 (dd, <i>J</i> = 13.8, 10.5 Hz, 1H), 2.52 (dd, <i>J</i> = 10.0, 5.2 Hz, 1H), 1.00 - 0.55 (m, 9H). MS (ESI <sup>+</sup> ) <i>m/z</i> (rel intensity): 311.2 ([M - H <sub>2</sub> O + H] <sup>+</sup> , 100).                                                                                                                                                                            |
| 31 | Ala(1-naph)-boroNva |    | <sup>1</sup> H NMR (D <sub>2</sub> O): δ 8.05 - 7.90 (m, 3H), 7.65 - 7.40 (m, 4H), 4.33 (dd, <i>J</i> = 10.2, 6.1 Hz, 1H), 3.80 - 3.65 (m, 1H), 3.65 - 3.50 (m, 1H), 2.50 - 2.47 (m, 1H), 1.10 - 1.00 (m, 1H), 0.90 - 0.65 (m, 6H). MS (ESI <sup>+</sup> ) <i>m/z</i> (rel intensity): 593.3 ([2 × (M - H <sub>2</sub> O) + H] <sup>+</sup> , 13), 337.1 ([M + Na] <sup>+</sup> , 12), 297.2 ([M - H <sub>2</sub> O + H] <sup>+</sup> , 100).                                                                                                               |
| 32 | Ala(1-naph)-boroPhe |    | <sup>1</sup> H NMR (D <sub>2</sub> O) δ 8.09 - 7.98 (m, 3H), 7.75 - 7.45 (m, 5H), 7.18 (m, 3H), 6.73 (m, 2H), 4.32 (dd, <i>J</i> = 9.8, 6.3 Hz, 1H), 3.78 (dd, <i>J</i> = 13.6, 6.3 Hz, 1H), 3.70 (dd, <i>J</i> = 13.6, 10.0 Hz, 1H), 2.85 (dd, <i>J</i> = 10.0, 5.3 Hz, 1H), 2.65 (dd, <i>J</i> = 13.9, 5.3 Hz, 1H), 2.12 (dd, <i>J</i> = 13.9, 10.5 Hz, 1H). MS (ESI <sup>+</sup> ) <i>m/z</i> (rel Intensity): 345.1 ([M - H <sub>2</sub> O + H] <sup>+</sup> , 100), 689.3 ([2 × (M - H <sub>2</sub> O) + H] <sup>+</sup> , 40).                        |
| 33 | Ala(1-naph)-boroPro |  | See <b>Supplementary Note 2</b>                                                                                                                                                                                                                                                                                                                                                                                                                                                                                                                             |
| 34 | Ala(1-naph)-boroSar |  | <sup>1</sup> H NMR (D <sub>2</sub> O) δ 8.13 - 7.97 (m, 3H), 7.73 - 7.43 (m, 4H), 4.91 (dd, <i>J</i> = 5.4, 10.9 Hz, 1H), 3.91 (dd, <i>J</i> = 13.7, 5.4 Hz, 1H), 3.60 (dd, <i>J</i> = 10.9, 13.7 Hz, 1H), 2.25 (d, <i>J</i> = 14.9 Hz, 1H), 2.16 (d, <i>J</i> = 14.9 Hz, 1H), 2.08 (s, 3H). <sup>13</sup> C NMR (D <sub>2</sub> O) δ 172.71, 136.08, 133.67, 131.72, 131.20, 131.13, 129.87, 129.02, 128.39, 124.96, 50.52, 47.36, 37.87, 36.15. MS (ESI <sup>+</sup> ) <i>m/z</i> (rel intensity): 269.2 ([M - H <sub>2</sub> O + H] <sup>+</sup> , 100). |

|    |                             |                                                                                     |                                                                                                                                                                                                                                                                                                                                                                                                                                                                                                                                      |
|----|-----------------------------|-------------------------------------------------------------------------------------|--------------------------------------------------------------------------------------------------------------------------------------------------------------------------------------------------------------------------------------------------------------------------------------------------------------------------------------------------------------------------------------------------------------------------------------------------------------------------------------------------------------------------------------|
| 35 | Ala(1-naph)-<br>Lys-boroLeu | 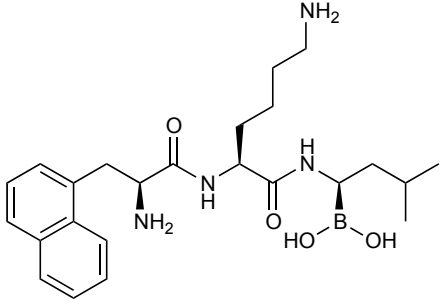  | $^1\text{H NMR (D}_2\text{O)}$ $\delta$ 8.0 (d, $J$ = 6.6 Hz, 2H), 7.90 (d, $J$ = 7.6 Hz, 1H), 7.65 - 7.42 (m, 4H), 4.31 (dd, $J$ = 8.0, 7.6 Hz, 1H), 4.08 (t, $J$ = 7.0 Hz, 1H), 3.68 - 3.58 (m, 2H), 2.86 (dd, $J$ = 8.0, 7.5 Hz, 2H), 2.59 (t, $J$ = 8.0 Hz, 1H), 1.60 - 1.48 (m, 5H), 1.31 - 1.16 (m, 4H), 0.90 (d, $J$ = 4.7 Hz, 3H), 0.88 (d, $J$ = 4.7 Hz, 3H). MS (ESI <sup>+</sup> ) $m/z$ (rel intensity): 220.2 ([M - H <sub>2</sub> O]/2 + H) <sup>+</sup> , 100), 439.2 ([M - H <sub>2</sub> O + H] <sup>+</sup> , 75). |
| 36 | Ala(1-naph)-<br>Pro-CN      |    | See <b>Supplementary Note 2</b>                                                                                                                                                                                                                                                                                                                                                                                                                                                                                                      |
| 37 | allo-Ile-boroPro            |    | $^1\text{H NMR (D}_2\text{O)}$ $\delta$ 4.20 (t, $J$ = 3.8 Hz, 1H), 3.67 (t, $J$ = 9.1 Hz, 1H), 3.47 - 3.38 (m, 1H), 3.02 (dd, $J$ = 11.4, 6.9 Hz, 1H), 2.11 - 1.87 (m, 4H), 1.70 - 1.55 (m, 1H), 1.47 - 1.31 (m, 2H), 0.95 - 0.88 (m, 6H). MS (ESI <sup>+</sup> ) $m/z$ (rel intensity): 229.2 ([M + H] <sup>+</sup> , 20), 211.2 ([M - H <sub>2</sub> O + H] <sup>+</sup> , 100).                                                                                                                                                  |
| 38 | Allo-Ile-<br>Isoindoline    |  | 37                                                                                                                                                                                                                                                                                                                                                                                                                                                                                                                                   |
| 39 | Arg-boroAla                 |  | $^1\text{H NMR (D}_2\text{O)}$ $\delta$ 4.01 (t, $J$ = 6.6 Hz, 1H), 3.23 (t, $J$ = 6.8 Hz, 2H), 2.96 (q, $J$ = 7.5 Hz, 1H), 1.94 - 1.88 (m, 2H), 1.68 - 1.62 (m, 2H), 1.17 (d, $J$ = 7.5 Hz, 3H). MS (ESI <sup>+</sup> ) $m/z$ (rel intensity): 246.1 ([M + H] <sup>+</sup> , 100).                                                                                                                                                                                                                                                  |
| 40 | Arg-boroGly                 |  | $^1\text{H NMR (D}_2\text{O)}$ $\delta$ 4.00 (t, $J$ = 6.6 Hz, 1H), 3.22 (t, $J$ = 6.8 Hz, 2H), 2.81 (d, $J$ = 16.9 Hz, 1H), 2.73 (d, $J$ = 16.9 Hz, 1H), 2.07 - 1.80 (m, 2H), 1.75 - 1.59 (m, 2H). MS (ESI <sup>+</sup> ) $m/z$ (rel Intensity): 232.1 ([M + H] <sup>+</sup> , 100).                                                                                                                                                                                                                                                |
| 41 | Arg-boroLeu                 |  | $^1\text{H NMR (D}_2\text{O)}$ $\delta$ 4.0 (t, $J$ = 6.6 Hz, 1H), 3.21 (t, $J$ = 6.8 Hz, 2H), 2.97 (dd, $J$ = 9.4, 6.3 Hz, 1H), 1.95 - 1.86 (m, 2H), 1.67 - 1.34 (m, 5H), 0.90 (d, $J$ = 5.8 Hz, 3H), 0.88 (d, $J$ = 5.3 Hz, 3H).                                                                                                                                                                                                                                                                                                   |

|    |             |                                                                                     |                                                                                                                                                                                                                                                                                                                                                                                                                     |
|----|-------------|-------------------------------------------------------------------------------------|---------------------------------------------------------------------------------------------------------------------------------------------------------------------------------------------------------------------------------------------------------------------------------------------------------------------------------------------------------------------------------------------------------------------|
|    |             |                                                                                     | MS (ESI <sup>+</sup> ) <i>m/z</i> (rel intensity): 270.2 ([M - H <sub>2</sub> O + H] <sup>+</sup> , 10), 288.2 ([M + H] <sup>+</sup> , 100).                                                                                                                                                                                                                                                                        |
| 42 | Arg-boroNva | 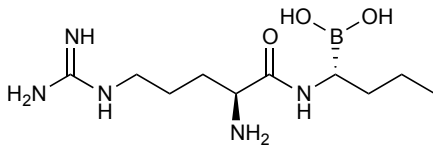   | <sup>1</sup> H NMR (D <sub>2</sub> O): δ 4.01 (t, <i>J</i> = 6.6 Hz), 3.22 (t, <i>J</i> = 6.8 Hz, 2H), 2.90 (t, <i>J</i> = 7.5 Hz, 1H), 1.95 - 1.87 (m, 2H), 1.66 - 1.61 (m, 2H), 1.56 - 1.49 (m, 2H), 1.37 - 1.29 (m, 2H), 0.90 (t, <i>J</i> = 7.2 Hz, 3H). MS (ESI <sup>+</sup> ) <i>m/z</i> (rel intensity): 274.2 ([M + H] <sup>+</sup> , 100), 256.1 ([M - H <sub>2</sub> O + H] <sup>+</sup> , 9).            |
| 43 | Arg-boroPhe |   | <sup>1</sup> H NMR (D <sub>2</sub> O) δ 7.50 - 7.25 (m, 5H), 3.91 (t, <i>J</i> = 6.7 Hz, 1H), 3.30 - 3.12 (m, 3H), 3.10 - 2.85 (m, 2H), 1.88 - 1.77 (m, 2H), 1.56 - 1.48 (m, 2H). MS (ESI <sup>+</sup> ) <i>m/z</i> (rel Intensity): 322.1 ([M + H] <sup>+</sup> , 100).                                                                                                                                            |
| 44 | Arg-boroPro |    | <sup>1</sup> H NMR (D <sub>2</sub> O) δ 4.34 (t, <i>J</i> = 6.1 Hz, 1H), 3.74 (t, <i>J</i> = 8.3 Hz, 1H), 3.50 - 3.41 (m, 1H), 3.23 (t, <i>J</i> = 6.9 Hz, 2H), 3.10 (dd, <i>J</i> = 10.8, 7.0 Hz, 1H), 2.15 - 2.07 (m, 2H), 2.00 - 1.85 (m, 3H), 1.75 - 1.60 (m, 3H). MS (ESI <sup>+</sup> ) <i>m/z</i> (rel intensity): 272.2 ([M + H] <sup>+</sup> , 50), 254.2 ([M - H <sub>2</sub> O + H] <sup>+</sup> , 100). |
| 45 | Arg-boroSar |  | <sup>1</sup> H NMR (D <sub>2</sub> O) δ 4.66 (t, <i>J</i> = 6.5 Hz, 1H), 3.25 (t, <i>J</i> = 6.7 Hz, 2H), 3.22 (s, 3H), 2.57 (s, 2H), 2.04 - 1.96 (m, 2H), 1.76 - 1.64 (m, 2H). <sup>13</sup> C NMR (D <sub>2</sub> O) δ 173.38, 159.27, 50.10, 49.65, 47.51, 42.83, 38.89, 29.69, 25.89. MS (ESI <sup>+</sup> ) <i>m/z</i> (rel intensity): 228.1 ([M - H <sub>2</sub> O + H] <sup>+</sup> , 100).                 |
| 46 | Arg-Pro-CN  |  | 38                                                                                                                                                                                                                                                                                                                                                                                                                  |
| 47 | Asn-boroAla |  | <sup>1</sup> H NMR (D <sub>2</sub> O) δ 4.32 (t, <i>J</i> = 5.9 Hz, 1H), 3.04 - 2.86 (m, 3H), 1.16 (d, <i>J</i> = 7.5 Hz, 3H). MS (ESI <sup>+</sup> ) <i>m/z</i> (rel intensity): 371.2 ([2 × (M - H <sub>2</sub> O) + H] <sup>+</sup> , 63), 226.1 ([M + Na] <sup>+</sup> , 34), 186.2 ([M - H <sub>2</sub> O + H] <sup>+</sup> , 100).                                                                            |

|    |             |  |                                                                                                                                                                                                                                                                                                                                     |
|----|-------------|--|-------------------------------------------------------------------------------------------------------------------------------------------------------------------------------------------------------------------------------------------------------------------------------------------------------------------------------------|
| 48 | Asn-boroGly |  | $^1\text{H NMR (D}_2\text{O)}$ $\delta$ 4.33 (dd, $J = 6.9, 6.1$ Hz, 1H), 3.02 - 2.89 (m, 2H), 2.82 (d, $J = 17.1$ Hz, 1H), 2.75 (d, $J = 17.1$ Hz, 1H). MS (ESI $^+$ ) $m/z$ (rel Intensity): 172.0 ([M - H $_2$ O + H] $^+$ , 100), 343.1 ([2 x (M - H $_2$ O) + H] $^+$ , 50).                                                   |
| 49 | Asn-boroLeu |  | 35                                                                                                                                                                                                                                                                                                                                  |
| 50 | Asn-boroNva |  | $^1\text{H NMR (D}_2\text{O)}$ : $\delta$ 4.34 (t, $J = 6.5$ Hz, 1H), 3.02 - 2.88 (m, 3H), 1.59 - 1.51 (m, 2H), 1.43 - 1.23 (m, 2H), 0.90 (t, $J = 7.3$ Hz, 3H). MS (ESI $^+$ ) $m/z$ (rel intensity): 427.3 ([2 x (M - H $_2$ O) + H] $^+$ , 100), 214.1 ([M - H $_2$ O + H] $^+$ , 67).                                           |
| 51 | Asn-boroPhe |  | See <b>Supplementary Note 2</b>                                                                                                                                                                                                                                                                                                     |
| 52 | Asn-boroPro |  | $^1\text{H NMR (D}_2\text{O)}$ $\delta$ 4.10 - 4.05 (m, 1H), 3.75 - 3.70 (m, 1H), 3.55 - 3.35 (m, 1H), 3.15 - 3.05 (m, 1H), 3.00 - 2.75 (m, 2H), 2.20 - 2.05 (m, 2H), 2.02 - 1.85 (m, 1H), 1.80 - 1.65 (m, 1H). MS (ESI $^+$ ) $m/z$ (rel intensity): 212.1 ([M - H $_2$ O + H] $^+$ , 100).                                        |
| 53 | Asn-boroSar |  | The obtained sample was a mixture of <b>Asn-boroSar</b> (- $^6/7$ ) and <b>Asp-boroSar</b> (-1/7). For <b>Asn-boroSar</b> , $^1\text{H NMR (D}_2\text{O)}$ $\delta$ 4.90 (dd, $J = 6.0, 7.4$ Hz, 1H), 3.21 (s, 3H), 3.00 - 2.93 (m, 2H), 2.58 (s, 2H). MS (ESI $^+$ ) $m/z$ (rel intensity): 186.1 ([M - H $_2$ O + H] $^+$ , 100). |
| 54 | Asn-Phe-CN  |  | $^1\text{H NMR (D}_2\text{O)}$ : $\delta$ 7.45 - 7.30 (m, 5H), 5.03 (t, $J = 7.6$ Hz, 1H), 4.24 (t, $J = 6.3$ Hz, 1H), 3.33 - 3.09 (m, 2H), 2.86 (d, $J = 6.2$ Hz, 2H). MS (ESI $^+$ ) $m/z$ (rel intensity): 261.1 ([M + H] $^+$ , 100).                                                                                           |

|    |             |                                                                                     |                                                                                                                                                                                                                                                                                                                                                                                         |
|----|-------------|-------------------------------------------------------------------------------------|-----------------------------------------------------------------------------------------------------------------------------------------------------------------------------------------------------------------------------------------------------------------------------------------------------------------------------------------------------------------------------------------|
| 55 | Asn-Pro-CN  | 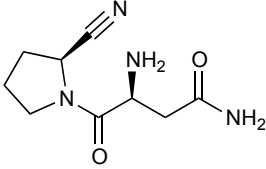   | <sup>1</sup> H NMR (D <sub>2</sub> O): δ 4.86 (dd, <i>J</i> = 7.2, 5.4 Hz, 1H), 4.63 (dd, <i>J</i> = 7.7, 5.4 Hz, 1H), 3.79 - 3.65 (m, 2H), 3.05 - 2.85 (m, 2H), 2.43 - 2.30 (m, 2H), 2.25 - 2.10 (m, 2H). MS (ESI <sup>+</sup> ) <i>m/z</i> (rel intensity): 211.1 ([M + H] <sup>+</sup> , 100).                                                                                       |
| 56 | Asp-boroAla |    | <sup>1</sup> H NMR (D <sub>2</sub> O) δ 4.35 (dd, <i>J</i> = 7.0, 5.6 Hz, 1H), 3.15 - 2.90 (m, 3H), 1.18 (d, <i>J</i> = 7.5 Hz, 3H). MS (ESI <sup>+</sup> ) <i>m/z</i> (rel intensity): 373.2 ([2 × (M - H <sub>2</sub> O) + H] <sup>+</sup> , 44), 187.1 ([M - H <sub>2</sub> O + H] <sup>+</sup> , 100).                                                                              |
| 57 | Asp-boroGly |    | <sup>1</sup> H NMR (D <sub>2</sub> O) δ 4.33 (dd, <i>J</i> = 7.2, 5.4 Hz, 1H), 3.15 - 2.91 (m, 3H), 2.90 - 2.70 (m, 2H). MS (ESI <sup>+</sup> ) <i>m/z</i> (rel Intensity): 173.1 ([M - H <sub>2</sub> O + H] <sup>+</sup> , 100).                                                                                                                                                      |
| 58 | Asp-boroLeu |    | <sup>1</sup> H NMR (D <sub>2</sub> O) δ 4.34 (dd, <i>J</i> = 6.3, 6.0 Hz, 1H), 3.11 - 2.96 (m, 3H), 1.60 - 1.44 (m, 2H), 1.38 - 1.21 (m, 1H), 0.89 (d, <i>J</i> = 4.9 Hz, 3H), 0.88 (d, <i>J</i> = 4.9 Hz, 3H). LCMS (ESI <sup>+</sup> ) <i>m/z</i> (rel intensity): 229.1 ([M - H <sub>2</sub> O + H] <sup>+</sup> , 100), 457.3 ([2 × (M - H <sub>2</sub> O) + H] <sup>+</sup> , 55). |
| 59 | Asp-boroNva |  | <sup>1</sup> H NMR (D <sub>2</sub> O): δ 4.35 (dd, <i>J</i> = 6.9, 1.3 Hz, 1H), 3.06 - 3.02 (m, 2H), 2.93 (t, <i>J</i> = 7.6 Hz, 1H), 1.57 - 1.49 (m, 2H), 1.36 - 1.28 (m, 2H), 0.88 (t, <i>J</i> = 7.2 Hz, 3H). MS (ESI <sup>+</sup> ) <i>m/z</i> (rel intensity): 429.2 ([2 × (M - H <sub>2</sub> O) + H] <sup>+</sup> , 89), 215.1 ([M - H <sub>2</sub> O + H] <sup>+</sup> , 100).  |
| 60 | Asp-boroPhe |  | See <b>Supplementary Note 2</b>                                                                                                                                                                                                                                                                                                                                                         |
| 61 | Asp-boroPro |  | 39                                                                                                                                                                                                                                                                                                                                                                                      |
| 62 | Asp-boroSar |  | <sup>1</sup> H NMR (D <sub>2</sub> O) major isomer (~ <sup>2</sup> / <sub>3</sub> ) δ 4.28 (d, <i>J</i> = 7.2 Hz, 1H), 3.05 (d, <i>J</i> = 18.3 Hz, 1H), 2.94 (s, 3H), 2.79 (d, <i>J</i> = 18.3 Hz, 1H), 2.63 (d, <i>J</i> = 14.5 Hz, 1H), 2.45 (d, <i>J</i> = 14.5 Hz, 1H); minor                                                                                                      |



|    |                     |                                                                                      |                                                                                                                                                                                                                                                                                                                                                                                                                                                                                                                                                        |
|----|---------------------|--------------------------------------------------------------------------------------|--------------------------------------------------------------------------------------------------------------------------------------------------------------------------------------------------------------------------------------------------------------------------------------------------------------------------------------------------------------------------------------------------------------------------------------------------------------------------------------------------------------------------------------------------------|
|    |                     |                                                                                      | <p>isomer (<math>\sim 1/3</math>) <math>\delta</math> 4.91 (dd, <math>J = 5.5, 7.9</math> Hz, 0.5H), 3.45 (s, 1.5H), 3.20 - 3.00 (m, 1H), 2.58 (s, 1H). <math>^{13}\text{C}</math> NMR (<math>\text{D}_2\text{O}</math>) major isomer <math>\delta</math> 174.30, 172.20, 47.07, 38.95, 36.29; minor isomer <math>\delta</math> 174.71, 172.20, 52.89, 48.57, 39.89, 35.55. MS (<math>\text{ESI}^+</math>) <math>m/z</math> (rel intensity): 187.0 (<math>[\text{M} - \text{H}_2\text{O} + \text{H}]^+</math>, 100).</p>                               |
| 63 | Asp-Phe-CN          | 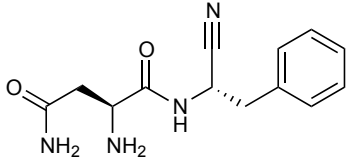    | <p><math>^1\text{H}</math> NMR (<math>\text{D}_2\text{O}</math>) <math>\delta</math> 7.43 - 7.28 (m, 5H), 5.02 (t, <math>J = 7.8</math> Hz, 1H), 4.26 - 4.20 (m, 1H), 3.30 - 3.10 (m, 2H), 2.91 (d, <math>J = 6.2</math> Hz, 2H). MS (<math>\text{ESI}^+</math>) <math>m/z</math> (rel intensity): 262.2 (<math>[\text{M} - \text{H}_2\text{O} + \text{H}]^+</math>, 100), 523.2 (<math>[2 \times (\text{M} - \text{H}_2\text{O}) + \text{H}]^+</math>, 30).</p>                                                                                       |
| 64 | Asp-Pro-CN          |     | <p><math>^1\text{H}</math> NMR (<math>\text{D}_2\text{O}</math>) <math>\delta</math> 4.86 (dd, <math>J = 6.9, 5.1</math> Hz, 1H), 4.64 (dd, <math>J = 7.9, 5.1</math> Hz, 1H), 3.79 - 3.68 (m, 2H), 3.14 (dd, <math>J = 17.7, 5.4</math> Hz, 1H), 3.0 (dd, <math>J = 17.7, 8.1</math> Hz, 1H), 2.42 - 2.30 (m, 2H), 2.25 - 2.10 (m, 2H). MS (<math>\text{ESI}^+</math>) <math>m/z</math> (rel intensity): 212.2 (<math>[\text{M} + \text{H}]^+</math>, 100), 422.9 (<math>[2\text{M} + \text{H}]^+</math>, 50).</p>                                    |
| 65 | Bortezomib          |   | 40                                                                                                                                                                                                                                                                                                                                                                                                                                                                                                                                                     |
| 66 | Cbz-ala-ala-boroLeu |  | <p><math>^1\text{H}</math> NMR (<math>\text{D}_2\text{O}</math>) <math>\delta</math> 7.62 (s, 5H), 5.32 (s, 2H), 4.58 (q, <math>J = 7.2</math> Hz, 1H), 4.24 (q, <math>J = 6.9</math> Hz, 1H), 2.93 (dd, <math>J = 8.0, 6.9</math> Hz, 1H), 1.77 (m, 3H), 1.60 - 1.41 (m, 8H), 1.07 (t, <math>J = 4.8</math> Hz, 6H). LCMS (<math>\text{ESI}^+</math>) <math>m/z</math> (rel intensity): 390.1 (<math>[\text{M} - \text{H}_2\text{O} + \text{H}]^+</math>, 100), 779.2 (<math>[2 \times (\text{M} - \text{H}_2\text{O}) + \text{H}]^+</math>, 50).</p> |
| 67 | Cbz-Gly-Gly-boroLeu |  | <p><math>^1\text{H}</math> NMR (<math>\text{D}_2\text{O}</math>) <math>\delta</math> 7.65 (s, 5H), 5.32 (s, 2H), 4.16 (s, 2H), 4.05 (s, 2H), 3.23 - 3.08 (m, H), 1.84 - 1.35 (m, 3H), 1.07 (t, <math>J = 4.8</math> Hz, 6H). MS (<math>\text{ESI}^+</math>) <math>m/z</math> (rel intensity): 362.2 (<math>[\text{M} - \text{H}_2\text{O} + \text{H}]^+</math>, 100), 723.1 (<math>[2 \times (\text{M} - \text{H}_2\text{O}) + \text{H}]^+</math>, 90).</p>                                                                                            |

|    |             |                                                                                     |                                                                                                                                                                                                                                                                                                                                                                                                                                        |
|----|-------------|-------------------------------------------------------------------------------------|----------------------------------------------------------------------------------------------------------------------------------------------------------------------------------------------------------------------------------------------------------------------------------------------------------------------------------------------------------------------------------------------------------------------------------------|
| 68 | Chg-boroAla | 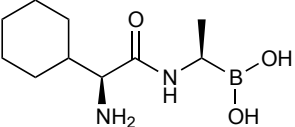   | <sup>1</sup> H NMR (D <sub>2</sub> O) δ 3.76 (d, <i>J</i> = 6.6 Hz, 1H), 2.87 (q, <i>J</i> = 7.4 Hz, 1H), 1.90 - 1.60 (m, 6H), 1.30 - 1.05 (m, 8H). MS (ESI <sup>+</sup> ) <i>m/z</i> (rel intensity): 421.3 ([2 × (M - H <sub>2</sub> O) + H] <sup>+</sup> , 86), 211.2 ([M - H <sub>2</sub> O + H] <sup>+</sup> , 100).                                                                                                              |
| 69 | Chg-boroGly |    | <sup>1</sup> H NMR (D <sub>2</sub> O) δ 3.74 (d, <i>J</i> = 6.7 Hz, 1H), 2.80 (d, <i>J</i> = 16.9 Hz, 1H), 2.68 (d, <i>J</i> = 16.9 Hz, 1H), 1.86 - 1.63 (m, 7H), 1.27 - 1.03 (m, 6H). MS (ESI <sup>+</sup> ) <i>m/z</i> (rel Intensity): 197.2 ([M - H <sub>2</sub> O + H] <sup>+</sup> , 100), 393.3 ([2 × (M - H <sub>2</sub> O) + H] <sup>+</sup> , 70).                                                                           |
| 70 | Chg-boroLeu |    | 35                                                                                                                                                                                                                                                                                                                                                                                                                                     |
| 71 | Chg-boroNva |    | <sup>1</sup> H NMR (D <sub>2</sub> O): δ 3.80 (d, <i>J</i> = 6.4 Hz, 1H), 2.82 (t, <i>J</i> = 7.6 Hz, 1H), 1.80 - 1.05 (m, 15H), 0.90 (t, <i>J</i> = 7.2 Hz, 3H). MS (ESI <sup>+</sup> ) <i>m/z</i> (rel intensity): 477.4 ([2 × (M - H <sub>2</sub> O) + H] <sup>+</sup> , 26), 239.2 ([M - H <sub>2</sub> O + H] <sup>+</sup> , 100).                                                                                                |
| 72 | Chg-boroPhe |  | <sup>1</sup> H NMR (D <sub>2</sub> O) δ 7.45 - 7.25 (m, 5H), 3.75 (d, <i>J</i> = 5.6 Hz, 1H), 3.18 (dd, <i>J</i> = 10.3, 5.4 Hz, 1H), 2.99 (dd, <i>J</i> = 14.2, 5.4 Hz, 1H), 2.82 (dd, <i>J</i> = 14.2, 10.3 Hz, 1H), 1.80 - 1.64 (m, 6H), 1.30 - 0.95 (m, 5H). MS (ESI <sup>+</sup> ) <i>m/z</i> (rel Intensity): 287.2 ([M - H <sub>2</sub> O + H] <sup>+</sup> , 100), 573.3 ([2 × (M - H <sub>2</sub> O) + H] <sup>+</sup> , 40). |
| 73 | Chg-boroPro |  | <sup>1</sup> H NMR (D <sub>2</sub> O) δ 4.05 (d, <i>J</i> = 5.6 Hz, 1H), 3.66 (dd, <i>J</i> = 9.1, 8.5 Hz, 1H), 3.44 (dd, <i>J</i> = 6.9, 6.6 Hz, 1H), 3.00 (dd, <i>J</i> = 7.2, 6.0 Hz, 1H), 2.06 - 1.58 (m, 9H), 1.18 - 1.04 (m, 5H). MS (ESI <sup>+</sup> ) <i>m/z</i> (rel intensity): 237.2 ([M - H <sub>2</sub> O + H] <sup>+</sup> , 100).                                                                                      |
| 74 | Chg-boroSar |  | <sup>1</sup> H NMR (D <sub>2</sub> O) δ 4.40 (d, <i>J</i> = 6.8 Hz, 1H), 3.23 (s, 3H), 2.51 (d, <i>J</i> = 14.9 Hz, 2H), 2.00 - 1.08 (m, 11H). <sup>13</sup> C NMR (D <sub>2</sub> O) δ 173.45, 54.70, 47.93, 41.84, 39.11, 30.65, 30.14, 27.76, 27.62. MS (ESI <sup>+</sup> ) <i>m/z</i> (rel intensity): 421.3 ([2 ×                                                                                                                 |

|    |                    |                                                                                     |                                                                                                                                                                                                                                                                                                                                                                                                                                                 |
|----|--------------------|-------------------------------------------------------------------------------------|-------------------------------------------------------------------------------------------------------------------------------------------------------------------------------------------------------------------------------------------------------------------------------------------------------------------------------------------------------------------------------------------------------------------------------------------------|
|    |                    |                                                                                     | (M - H <sub>2</sub> O) + H] <sup>+</sup> , 100), 211.1 ([M - H <sub>2</sub> O + H] <sup>+</sup> , 16).                                                                                                                                                                                                                                                                                                                                          |
| 75 | Chg-Pro-CN         | 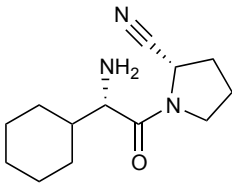   | 41                                                                                                                                                                                                                                                                                                                                                                                                                                              |
| 76 | D-pGlu-Lys-boroMet |    | <sup>1</sup> H NMR (D <sub>2</sub> O) δ 4.46 (dd, <i>J</i> = 7.1, 7.0 Hz, 1H), 4.37 (dd, <i>J</i> = 8.3, 4.5 Hz, 1H), 2.96 (t, <i>J</i> = 7.3 Hz, 2H), 2.77 (dd, <i>J</i> = 8.3, 6.9 Hz, 1H), 2.65 - 2.48 (m, 3H), 2.42 (dd, <i>J</i> = 8.3, 7.0 Hz, 2H), 2.09 (s, 3H), 2.08 - 2.00 (m, 2H), 1.95 - 1.55 (m, 6H), 1.50 - 1.40 (m, 2H). MS(ESI <sup>+</sup> ) <i>m/z</i> (rel intensity): 373.3 ([M - H <sub>2</sub> O + H] <sup>+</sup> , 100). |
| 77 | D-Phg-Lys-boroMet  |   | <sup>1</sup> H NMR (D <sub>2</sub> O) δ 7.26 (m, 5H), 4.92 (s, 1H), 4.28 (dd, <i>J</i> = 9.3, 5.3 Hz, 1H), 2.49 (m, 3H), 2.31 (dd, <i>J</i> = 7.2, 6.9 Hz, 2H), 1.84 (s, 3H), 1.58 - 1.35 (m, 4H), 1.25 - 1.15 (m, 2H), 0.95 - 0.80 (m, 2H). MS (ESI <sup>+</sup> ) <i>m/z</i> (rel intensity): 393.2 ([M - H <sub>2</sub> O + H] <sup>+</sup> , 100).                                                                                          |
| 78 | Gln-boroAla        |  | 31                                                                                                                                                                                                                                                                                                                                                                                                                                              |
| 79 | Gln-boroGly        |  | <sup>1</sup> H NMR (D <sub>2</sub> O) δ 4.03 (t, <i>J</i> = 6.6 Hz, 1H), 2.82 (d, <i>J</i> = 16.9 Hz, 1H), 2.73 (d, <i>J</i> = 16.9 Hz, 1H), 2.52 - 2.32 (m, 2H), 2.15 (dd, <i>J</i> = 7.3, 7.1 Hz, 2H). MS (ESI <sup>+</sup> ) <i>m/z</i> (rel Intensity): 186.1 ([M - H <sub>2</sub> O + H] <sup>+</sup> , 100).                                                                                                                              |
| 80 | Gln-boroLeu        |  | <sup>1</sup> H NMR (D <sub>2</sub> O) δ 4.44 (dd, <i>J</i> = 9.0, 4.9 Hz, 1H), 2.81 (dd, <i>J</i> = 8.4, 7.2 Hz, 1H), 2.60 - 2.40 (m, 3H), 2.15 - 2.08 (m, 1H), 1.61 - 1.56 (m, 1H), 1.41 - 1.38 (m, 1H), 1.37 - 1.29 (m, 1H), 0.89 (t, <i>J</i> = 4.2 Hz, 6H). MS (ESI <sup>+</sup> ) <i>m/z</i> (rel intensity): 225.1 ([M - H <sub>2</sub> O + H] <sup>+</sup> , 100), 449.3 ([2 x (M - H <sub>2</sub> O) + H] <sup>+</sup> , 90).           |

|    |             |                                                                                     |                                                                                                                                                                                                                                                                                                                                                                                                                                                                                                             |
|----|-------------|-------------------------------------------------------------------------------------|-------------------------------------------------------------------------------------------------------------------------------------------------------------------------------------------------------------------------------------------------------------------------------------------------------------------------------------------------------------------------------------------------------------------------------------------------------------------------------------------------------------|
| 81 | Gln-boroNva | 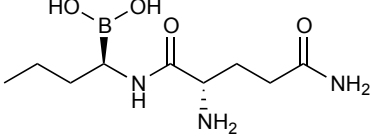   | <sup>1</sup> H NMR (D <sub>2</sub> O): δ 4.05 (t, <i>J</i> = 6.6 Hz, 1H), 2.93 (t, <i>J</i> = 7.4 Hz, 1H), 2.50 - 2.41 (m, 2H), 2.19 - 2.12 (m, 2H), 1.58 - 1.51 (m, 2H), 1.40 - 1.28 (m, 2H), 0.89 (t, <i>J</i> = 7.2 Hz, 3H). MS (ESI <sup>+</sup> ) <i>m/z</i> (rel intensity): 455.4 ([2 × (M - H <sub>2</sub> O) + H] <sup>+</sup> , 65), 268.2 ([M + Na] <sup>+</sup> , 15), 228.2 ([M - H <sub>2</sub> O + H] <sup>+</sup> , 100).                                                                   |
| 82 | Gln-boroPhe |    | <sup>1</sup> H NMR (D <sub>2</sub> O) δ 7.45 - 7.25 (m, 5H), 4.38 (dd, <i>J</i> = 10.0, 4.8 Hz, 1H), 3.12 (dd, <i>J</i> = 10.2, 5.6 Hz, 1H), 2.95 (dd, <i>J</i> = 14.0, 5.6 Hz, 1H), 2.72 (dd, <i>J</i> = 14.0, 10.4 Hz, 1H), 2.55 - 2.35 (m, 3H), 2.05 - 1.95 (m, 1H). MS (ESI <sup>+</sup> ) <i>m/z</i> (rel Intensity): 259.1 ([M - H <sub>2</sub> O - NH <sub>3</sub> + H] <sup>+</sup> , 100).                                                                                                         |
| 83 | Gln-boroPro |    | <sup>1</sup> H NMR (D <sub>2</sub> O) δ 4.36 (t, <i>J</i> = 6.0 Hz, 1H), 3.70 (dt, <i>J</i> = 8.3, 2.1 Hz, 1H), 3.52 - 3.42 (m, 1H), 3.09 (dd, <i>J</i> = 10.8, 7.0 Hz, 1H), 2.51 - 2.41 (m, 2H), 2.21 - 2.07 (m, 4H), 1.97 - 1.92 (m, 1H), 1.75 - 1.71 (m, 1H). MS (ESI <sup>+</sup> ) <i>m/z</i> (rel intensity): 209.1 ([M - H <sub>2</sub> O - NH <sub>3</sub> + H] <sup>+</sup> , 15), 226.1 ([M - H <sub>2</sub> O + H] <sup>+</sup> , 100), 244.1 ([M + H] <sup>+</sup> , 10).                       |
| 84 | Gln-Pro-CN  |  | <sup>1</sup> H NMR (D <sub>2</sub> O) δ 4.85 (dd, <i>J</i> = 7.5, 5.4 Hz, 1H), 4.42 (t, <i>J</i> = 5.9 Hz, 1H), 3.80 - 3.64 (m, 2H), 2.63 (t, <i>J</i> = 10.8, 7.0 Hz, 2H), 2.43 - 2.12 (m, 6H). MS (ESI <sup>+</sup> ) <i>m/z</i> (rel intensity): 208.1 ([M - NH <sub>3</sub> + H] <sup>+</sup> , 70), 225.1 ([M + H] <sup>+</sup> , 100).                                                                                                                                                                |
| 85 | Glu-boroAla |  | 31                                                                                                                                                                                                                                                                                                                                                                                                                                                                                                          |
| 86 | Glu-boroGly |  | <sup>1</sup> H NMR (D <sub>2</sub> O): δ 4.20 (t, <i>J</i> = 6.8 Hz, 1H), 2.81 (d, <i>J</i> = 16.9 Hz, 1H), 2.71 (d, <i>J</i> = 16.9 Hz, 1H), 2.54 (t, <i>J</i> = 7.3 Hz, 2H), 2.14 (dd, <i>J</i> = 7.2, 6.7 Hz, 2H). MS (ESI <sup>+</sup> ) <i>m/z</i> (rel intensity): 355.1 ([2 × (M - H <sub>2</sub> O) - H <sub>2</sub> O + H] <sup>+</sup> , 63), 205.2 ([M + H] <sup>+</sup> , 34), 187.1 ([M - H <sub>2</sub> O + H] <sup>+</sup> , 100), 169.1 ([M - 2 × H <sub>2</sub> O + H] <sup>+</sup> , 55). |

|    |                                  |  |                                                                                                                                                                                                                                                                                                                                                                                                                                              |
|----|----------------------------------|--|----------------------------------------------------------------------------------------------------------------------------------------------------------------------------------------------------------------------------------------------------------------------------------------------------------------------------------------------------------------------------------------------------------------------------------------------|
| 87 | Glu-boroLeu                      |  | <sup>1</sup> H NMR (D <sub>2</sub> O) δ 4.08 (t, <i>J</i> = 6.9 Hz, 1H), 2.98 (dd, <i>J</i> = 9.3, 6.5 Hz, 1H), 2.60 - 2.45 (m, 2H), 2.21 - 2.13 (m, 2H), 1.61 - 1.35 (m, 3H), 0.90 (t, <i>J</i> = 5.7 Hz, 6H). MS (ESI <sup>+</sup> ) <i>m/z</i> (rel intensity): 225.1 ([M - 2H <sub>2</sub> O + H] <sup>+</sup> , 25), 243.1 ([M - H <sub>2</sub> O + H] <sup>+</sup> , 100), 467.3 ([2 x (M - H <sub>2</sub> O) + H] <sup>+</sup> , 90). |
| 88 | Glu-boroNva                      |  | <sup>1</sup> H NMR (D <sub>2</sub> O): δ 4.07 (t, <i>J</i> = 6.7 Hz, 1H), 2.91 (t, <i>J</i> = 7.4 Hz, 1H), 2.57 - 2.51 (m, 2H), 2.20 - 2.13 (m, 2H), 1.57 - 1.50 (m, 2H), 1.38 - 1.30 (m, 2H), 0.89 (t, <i>J</i> = 7.2 Hz, 3H). MS (ESI <sup>+</sup> ) <i>m/z</i> (rel intensity): 439.2 ([2 x M - 3 x H <sub>2</sub> O + H] <sup>+</sup> , 100), 229.1 ([M - H <sub>2</sub> O + H] <sup>+</sup> , 75).                                      |
| 89 | Glu-boroPhe                      |  | <sup>1</sup> H NMR (D <sub>2</sub> O) δ 7.45 - 7.25 (m, 5H), 3.99 (t, <i>J</i> = 6.3 Hz, 1H), 3.25 (dd, <i>J</i> = 10.1, 6.2 Hz, 1H), 2.98 (dd, <i>J</i> = 14.0, 6.2 Hz, 1H), 2.88 (dd, <i>J</i> = 14.0, 10.1 Hz, 1H), 2.38 (t, <i>J</i> = 7.5 Hz, 2H), 2.08 (dt, <i>J</i> = 7.5, 6.3 Hz, 2H). MS (ESI <sup>+</sup> ) <i>m/z</i> (rel Intensity): 277.1 ([M - H <sub>2</sub> O + H] <sup>+</sup> , 100), 295.1([M + H] <sup>+</sup> , 20).   |
| 90 | Glu-boroPro                      |  | 31                                                                                                                                                                                                                                                                                                                                                                                                                                           |
| 91 | Glu-boroPro thioamide            |  | <sup>1</sup> H NMR (D <sub>2</sub> O) δ 4.65 (t, <i>J</i> = 6.2 Hz, 1H), 4.10 - 3.95 (m, 1H), 3.75 - 3.65 (m, 1H), 3.58 (t, <i>J</i> = 8.3 Hz, 1H), 2.63 (t, 2H), 2.30 - 1.85 (m, 6H). MS (ESI <sup>+</sup> ) <i>m/z</i> (rel intensity): 261.1 ([M + H] <sup>+</sup> , 100).                                                                                                                                                                |
| 92 | Glu-boroSar                      |  | <sup>1</sup> H NMR (D <sub>2</sub> O) δ 2.21 (dt, <i>J</i> = 6.4, 7.1 Hz, 2H), 2.50 (s, 2H), 2.59 (t, <i>J</i> = 7.1 Hz, 2H), 3.22 (s, 3H), 4.69 (t, <i>J</i> = 6.4 Hz, 1H). <sup>13</sup> C NMR (D <sub>2</sub> O) δ 178.12, 173.15, 49.61, 47.48, 38.74, 30.96, 27.43. MS (ESI <sup>+</sup> ) <i>m/z</i> (rel intensity): 201.1 ([M - H <sub>2</sub> O + H] <sup>+</sup> , 100).                                                           |
| 93 | Glu-boroSar thioamide (ARI-2408) |  | See <b>Supplementary Note 2</b>                                                                                                                                                                                                                                                                                                                                                                                                              |

|     |             |                                                                                     |                                                                                                                                                                                                                                                                                                                                                                                                      |
|-----|-------------|-------------------------------------------------------------------------------------|------------------------------------------------------------------------------------------------------------------------------------------------------------------------------------------------------------------------------------------------------------------------------------------------------------------------------------------------------------------------------------------------------|
| 94  | Glu-Pro-CN  | 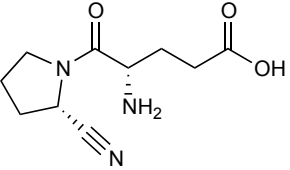   | <sup>1</sup> H NMR (D <sub>2</sub> O) δ 4.85 (dd, <i>J</i> = 7.5, 5.3 Hz, 1H), 4.45 (t, <i>J</i> = 6.0 Hz, 1H), 3.83 - 3.66 (m, 2H), 2.63 (t, <i>J</i> = 10.8, 7.0 Hz, 2H), 2.43 - 2.12 (m, 6H). MS (ESI <sup>+</sup> ) <i>m/z</i> (rel intensity): 208.1 ([M - H <sub>2</sub> O + H] <sup>+</sup> , 70), 226.1 ([M + H] <sup>+</sup> , 100).                                                        |
| 95  | Gly-boroAla |    | <sup>1</sup> H NMR (D <sub>2</sub> O) δ 3.82 (s, 2H), 2.98 (q, <i>J</i> = 7.5 Hz, 1H), 1.16 (d, <i>J</i> = 7.5 Hz, 3H). MS (ESI <sup>+</sup> ) <i>m/z</i> (rel intensity): 257.2 ([2 × (M - H <sub>2</sub> O) + H] <sup>+</sup> , 100), 169.2 ([M + Na] <sup>+</sup> , 6), 129.3 ([M - H <sub>2</sub> O + H] <sup>+</sup> , 23).                                                                     |
| 96  | Gly-boroGly |    | <sup>1</sup> H NMR (D <sub>2</sub> O) δ 3.80 (s, 2H), 2.76 (s, 2H). <sup>13</sup> C NMR (D <sub>2</sub> O) δ 171.19, 47.07, 38.09. MS (ESI <sup>+</sup> ) <i>m/z</i> (rel intensity): 115.1 ([M - H <sub>2</sub> O + H] <sup>+</sup> , 100).                                                                                                                                                         |
| 97  | Gly-boroLeu |    | 35                                                                                                                                                                                                                                                                                                                                                                                                   |
| 98  | Gly-boroNva |  | <sup>1</sup> H NMR (D <sub>2</sub> O): δ 3.84 (s, 2H), 2.98 (t, <i>J</i> = 7.3 Hz, 1H), 1.59 - 1.51 (m, 2H), 1.39 - 1.29 (m, 2H), 0.90 (t, <i>J</i> = 7.1 Hz, 3H). MS (ESI <sup>+</sup> ) <i>m/z</i> (rel intensity): 469.3 ([3 × (M - H <sub>2</sub> O) + H] <sup>+</sup> , 20), 313.2 ([2 × (M - H <sub>2</sub> O) + H] <sup>+</sup> , 100), 157.1 ([M - H <sub>2</sub> O + H] <sup>+</sup> , 63). |
| 99  | Gly-boroPhe |  | See <b>Supplementary Note 2</b>                                                                                                                                                                                                                                                                                                                                                                      |
| 100 | Gly-boroPro |  | 42                                                                                                                                                                                                                                                                                                                                                                                                   |
| 101 | Gly-boroSar |  | <sup>1</sup> H NMR (D <sub>2</sub> O) δ 4.18 (s, 2H), 3.10 (s, 3H), 2.55 (s, 2H). <sup>13</sup> C NMR (D <sub>2</sub> O) δ 171.19, 46.47, 39.84, 38.11. MS (ESI <sup>+</sup> ) <i>m/z</i> (rel intensity): 129.2 ([M - H <sub>2</sub> O + H] <sup>+</sup> , 100).                                                                                                                                    |

|     |             |                                                                                     |                                                                                                                                                                                                                                                                                                                                                                                                                          |
|-----|-------------|-------------------------------------------------------------------------------------|--------------------------------------------------------------------------------------------------------------------------------------------------------------------------------------------------------------------------------------------------------------------------------------------------------------------------------------------------------------------------------------------------------------------------|
| 102 | Gly-Pro-CN  | 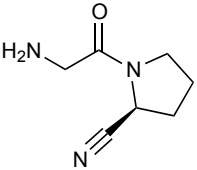   | 43                                                                                                                                                                                                                                                                                                                                                                                                                       |
| 103 | His-boroAla |    | <sup>1</sup> H NMR (D <sub>2</sub> O) 8.70 (s, 1H), 7.44 (s, 1H), 4.23 (dd, <i>J</i> = 7.8, 6.6 Hz, 1H), 3.40 - 3.35 (m, 2H), 2.99 (q, <i>J</i> = 7.5 Hz, 1H), 1.09 (d, <i>J</i> = 7.5 Hz, 3H). MS (ESI <sup>+</sup> ) <i>m/z</i> (rel intensity): 417.3 ([2 × (M - H <sub>2</sub> O) + H] <sup>+</sup> , 21), 209.2 ([M - H <sub>2</sub> O + H] <sup>+</sup> , 100).                                                    |
| 104 | His-boroGly |    | <sup>1</sup> H NMR (D <sub>2</sub> O) δ 8.70 (s, 1H), 7.44 (s, 1H), 4.26 (t, <i>J</i> = 7.1 Hz, 1H), 3.38 (d, <i>J</i> = 7.1 Hz, 2H), 2.75 (s, 2H). MS (ESI <sup>+</sup> ) <i>m/z</i> (rel Intensity): 195.0 ([M - H <sub>2</sub> O + H] <sup>+</sup> , 100), 213.0 ([M + H] <sup>+</sup> , 20).                                                                                                                         |
| 105 | His-boroLeu |   | 35                                                                                                                                                                                                                                                                                                                                                                                                                       |
| 106 | His-boroNva |  | <sup>1</sup> H NMR (D <sub>2</sub> O): δ 8.72 (s, 1H), 7.45 (s, 1H), 4.25 (dd, <i>J</i> = 8.3, 6.3 Hz, 1H), 3.43 - 3.31 (m, 2H), 2.95 (dd, <i>J</i> = 8.5, 2.1 Hz, 1H), 1.51 - 1.38 (m, 2H), 1.22 - 1.14 (m, 2H), 0.86 (t, <i>J</i> = 7.3 Hz, 3H). MS (ESI <sup>+</sup> ) <i>m/z</i> (rel intensity): 473.3 ([2 × (M - H <sub>2</sub> O) + H] <sup>+</sup> , 19), 237.2 ([M - H <sub>2</sub> O + H] <sup>+</sup> , 100). |
| 107 | His-boroPhe |  | <sup>1</sup> H NMR (D <sub>2</sub> O) δ 8.63 (s, 1H), 7.45 - 7.07 (m, 6H), 4.20 (dd, <i>J</i> = 7.4, 7.1 Hz, 1H), 3.40 - 3.20 (m, 13H), 2.92 (dd, <i>J</i> = 14.1, 6.3 Hz, 1H), 2.79 (dd, <i>J</i> = 14.1, 9.6 Hz, 1H). MS (ESI <sup>+</sup> ) <i>m/z</i> (rel Intensity): 285.1 ([M - H <sub>2</sub> O + H] <sup>+</sup> , 100).                                                                                        |
| 108 | His-boroPro |  | 34                                                                                                                                                                                                                                                                                                                                                                                                                       |

|     |                 |                                                                                     |                                                                                                                                                                                                                                                                                                                                                                                                  |
|-----|-----------------|-------------------------------------------------------------------------------------|--------------------------------------------------------------------------------------------------------------------------------------------------------------------------------------------------------------------------------------------------------------------------------------------------------------------------------------------------------------------------------------------------|
| 109 | His-Pro-CN      | 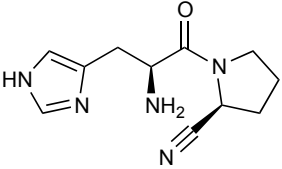   | $^1\text{H NMR (D}_2\text{O)}$ $\delta$ 8.76 (s, 1H), 7.49 (s, 1H), 4.83 (dd, $J = 7.2, 5.3$ Hz, 1H), 4.67 (t, $J = 6.9$ Hz, 1H), 3.74 - 3.65 (m, 1H), 3.51 - 3.41 (m, 3H), 2.37 - 2.27 (m, 2H), 2.14 - 2.06 (m, 2H). MS (ESI <sup>+</sup> ) $m/z$ (rel intensity): 234.1 ([M + H] <sup>+</sup> , 100).                                                                                          |
| 110 | Ica-Lys-boroMet |    | $^1\text{H NMR (D}_2\text{O)}$ $\delta$ 7.42 - 7.25 (m, 4H), 4.78 (br, 1H), 4.50 (t, $J = 7.3$ Hz, 1H), 3.71 (d, $J = 10.0$ Hz, 1H), 3.36 (d, $J = 6.0$ Hz, 1H), 2.99 (t, $J = 7.5$ Hz, 2H), 2.78 (dd, $J = 8.3, 6.3$ Hz, 1H), 2.04 (s, 3H), 1.95 - 1.60 (m, 6H), 1.50 - 1.40 (m, 2H). MS (ESI <sup>+</sup> ) $m/z$ (rel intensity): 405.1 ([M - H <sub>2</sub> O + H] <sup>+</sup> , 100).      |
| 111 | Ile-boroAla     |    | $^1\text{H NMR (D}_2\text{O)}$ $\delta$ 3.88 (d, $J = 6.4$ Hz, 1H), 2.89 (q, $J = 7.5$ Hz, 1H), 2.00 - 1.93 (m, 1H), 1.60 - 1.19 (m, 2H), 1.16 (d, $J = 7.5$ Hz, 3H), 1.00 (d, $J = 7.0$ Hz, 3H), 0.93 (t, $J = 6.7$ Hz, 3H). MS (ESI <sup>+</sup> ) $m/z$ (rel intensity): 553.3 ([2 x (M - H <sub>2</sub> O) + H] <sup>+</sup> , 100), 185.2 ([M - H <sub>2</sub> O + H] <sup>+</sup> , 28).   |
| 112 | Ile-boroGly     |  | $^1\text{H NMR (D}_2\text{O)}$ $\delta$ 3.85 (d, $J = 6.2$ Hz, 1H), 2.81 (d, $J = 16.8$ Hz, 1H), 2.70 (d, $J = 16.8$ Hz, 1H), 1.98 - 1.92 (m, 2H), 1.56 - 1.48 (m, 1H), 0.98 (d, $J = 6.9$ Hz, 3H), 0.93 (t, $J = 7.4$ Hz, 3H). MS (ESI <sup>+</sup> ) $m/z$ (rel Intensity): 171.1 ([M - H <sub>2</sub> O + H] <sup>+</sup> , 100), 341.2 ([2 x (M - H <sub>2</sub> O) + H] <sup>+</sup> , 80). |
| 113 | Ile-boroLeu     |  | $^1\text{H NMR (D}_2\text{O)}$ $\delta$ 3.90 (d, $J = 5.8$ Hz, 1H), 2.90 (dd, $J = 9.4, 6.5$ Hz, 1H), 2.03 - 1.97 (m, 1H), 1.57 - 1.25 (m, 5H), 1.00 (d, $J = 6.9$ Hz, 3H), 0.98 - 0.88 (m, 9H). MS (ESI <sup>+</sup> ) $m/z$ (rel intensity): 227.1 ([M - H <sub>2</sub> O + H] <sup>+</sup> , 70), 453.3 ([2 x (M - H <sub>2</sub> O) + H] <sup>+</sup> , 100).                                |
| 114 | Ile-boroNva     |  | $^1\text{H NMR (D}_2\text{O)}$ $\delta$ 3.88 (d, $J = 5.9$ Hz, 1H), 2.81 (t, $J = 7.5$ Hz, 1H), 1.99 - 1.93 (m, 1H), 1.55 - 1.23 (m, 6H), 1.00 - 0.86 (m, 9H). MS (ESI <sup>+</sup> ) $m/z$ (rel intensity): 637.5 ([3 x (M - H <sub>2</sub> O) + H] <sup>+</sup> , 4), 425.3 ([2 x (M - H <sub>2</sub> O) + H] <sup>+</sup> , 100), 213.2 ([M - H <sub>2</sub> O + H] <sup>+</sup> , 29).       |



|     |                 |                                                                                     |                                                                                                                                                                                                                                                                                                                                                                                                                                                        |
|-----|-----------------|-------------------------------------------------------------------------------------|--------------------------------------------------------------------------------------------------------------------------------------------------------------------------------------------------------------------------------------------------------------------------------------------------------------------------------------------------------------------------------------------------------------------------------------------------------|
| 115 | Ile-boroPhe     | 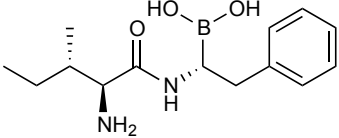   | <sup>1</sup> H NMR (D <sub>2</sub> O) δ 7.45 - 7.25 (m, 5H), 3.76 (m, 1H), 3.10 (m, 1H), 2.95 - 2.92 (m, 1H), 2.79 - 2.73 (m, 1H), 1.88 (m, 1H), 1.21 - 1.10 (m, 1H), 0.97 (d, <i>J</i> = 6.9 Hz, 3H), 0.91 (t, <i>J</i> = 7.4 Hz, 3H). MS (ESI <sup>+</sup> ) <i>m/z</i> (rel Intensity): 261.1 ([M - H <sub>2</sub> O + H] <sup>+</sup> , 100), 521.3 ([2 x (M - H <sub>2</sub> O) + H] <sup>+</sup> , 40).                                          |
| 116 | Ile-boroPro     |    | 34                                                                                                                                                                                                                                                                                                                                                                                                                                                     |
| 117 | Ile-boroSar     |    | <sup>1</sup> H NMR (D <sub>2</sub> O) δ 4.47 (d, <i>J</i> = 6.4 Hz, 1H), 3.24 (s, 3H), 2.54 (dd, <i>J</i> = 14.9, 7.9 Hz, 2H), 1.60 - 1.21 (m, 2H), 2.12 - 2.07 (m, 1H), 1.04 (d, <i>J</i> = 7.0 Hz, 3H), 0.94 (t, <i>J</i> = 6.7 Hz, 3H). <sup>13</sup> C NMR (D <sub>2</sub> O) δ 173.49, 54.59, 47.85, 39.16, 38.91, 26.34, 16.44, 12.84. MS (ESI <sup>+</sup> ) <i>m/z</i> (rel intensity): 185.1 ([M - H <sub>2</sub> O + H] <sup>+</sup> , 100). |
| 118 | Ile-Isoindoline |  | 44                                                                                                                                                                                                                                                                                                                                                                                                                                                     |
| 119 | Ile-Pro-CN      |  | 45                                                                                                                                                                                                                                                                                                                                                                                                                                                     |
| 120 | Leu-boroAla     |  | <sup>1</sup> H NMR (D <sub>2</sub> O) δ 3.96 (t, <i>J</i> = 7.2 Hz, 1H), 2.82 (q, <i>J</i> = 7.5 Hz, 1H), 1.71 - 1.55 (m, 3H), 1.08 (d, <i>J</i> = 7.5 Hz, 3H), 0.90 - 0.86 (m, 6H). MS (ESI <sup>+</sup> ) <i>m/z</i> (rel intensity): 369.3 ([2 x (M - H <sub>2</sub> O) + H] <sup>+</sup> , 100), 185.2 ([M - H <sub>2</sub> O + H] <sup>+</sup> , 57).                                                                                             |
| 121 | Leu-boroGly     |  | <sup>1</sup> H NMR (D <sub>2</sub> O) δ 3.99 (dd, <i>J</i> = 7.4, 7.1 Hz, 1H), 2.80 (d, <i>J</i> = 16.8 Hz, 1H), 2.70 (d, <i>J</i> = 16.8 Hz, 1H), 1.80 - 1.58 (m, 2H), 0.96 - 0.88 (m, 6H). MS (ESI <sup>+</sup> ) <i>m/z</i> (rel Intensity): 171.1 ([M - H <sub>2</sub> O + H] <sup>+</sup> , 100), 341.2 ([2 x (M -                                                                                                                                |

|     |             |  |                                                                                                                                                                                                                                                                                                                                                                                                                                             |
|-----|-------------|--|---------------------------------------------------------------------------------------------------------------------------------------------------------------------------------------------------------------------------------------------------------------------------------------------------------------------------------------------------------------------------------------------------------------------------------------------|
|     |             |  | $\text{H}_2\text{O}) + \text{H}]^+$ , 95).                                                                                                                                                                                                                                                                                                                                                                                                  |
| 122 | Leu-boroLeu |  | 35                                                                                                                                                                                                                                                                                                                                                                                                                                          |
| 123 | Leu-boroNva |  | $^1\text{H NMR (D}_2\text{O)}$ : $\delta$ 4.03 (t, $J = 7.0$ Hz, 1H), 2.85 (t, $J = 7.3$ Hz, 1H), 1.78 - 1.63 (m, 3H), 1.56 - 1.49 (m, 2H), 1.39 - 1.28 (m, 2H), 0.97 - 0.90 (m, 9H). MS (ESI $^+$ ) $m/z$ (rel intensity): 637.6 ( $[3 \times (\text{M} - \text{H}_2\text{O}) + \text{H}]^+$ , 3), 425.3 ( $[2 \times (\text{M} - \text{H}_2\text{O}) + \text{H}]^+$ , 100), 213.2 ( $[\text{M} - \text{H}_2\text{O} + \text{H}]^+$ , 57). |
| 124 | Leu-boroPhe |  | $^1\text{H NMR (D}_2\text{O)}$ $\delta$ 7.45 - 7.25 (m, 5H), 3.91 (t, $J = 7.0$ Hz, 1H), 3.16 (dd, $J = 10.0, 5.7$ Hz, 1H), 2.99 (dd, $J = 14.0, 5.7$ Hz, 1H), 2.79 (dd, $J = 14.0, 10.0$ Hz, 1H), 1.50 - 1.30 (m, 3H), 0.95 - 0.91 (m, 6H). MS (ESI $^+$ ) $m/z$ (rel Intensity): 261.1 ( $[\text{M} - \text{H}_2\text{O} + \text{H}]^+$ , 100), 521.3 ( $[2 \times (\text{M} - \text{H}_2\text{O}) + \text{H}]^+$ , 40).                  |
| 125 | Leu-boroPro |  | 34                                                                                                                                                                                                                                                                                                                                                                                                                                          |
| 126 | Leu-boroSar |  | $^1\text{H NMR (D}_2\text{O)}$ $\delta$ 4.58 (dd, $J = 5.3, 3.2$ Hz, 2H), 3.21 (s, 3H), 2.54 (s, 2H), 1.86 - 1.72 (m, 3H), 0.99 (d, $J = 5.3$ Hz, 6H). $^{13}\text{C NMR (D}_2\text{O)}$ $\delta$ 174.13, 49.18, 47.55, 41.17, 38.68, 26.27, 24.98, 24.59, 23.10, 22.79. MS (ESI $^+$ ) $m/z$ (rel intensity): 185.1 ( $[\text{M} - \text{H}_2\text{O} + \text{H}]^+$ , 100).                                                               |
| 127 | Leu-Pro-CN  |  | $^1\text{H NMR (D}_2\text{O)}$ $\delta$ 4.86 (dd, $J = 7.5, 5.2$ Hz, 1H), 4.33 - 4.29 (m, 1H), 3.74 - 3.66 (m, 2H), 2.45 - 2.25 (m, 2H), 2.23 - 2.12 (m, 2H), 2.10 - 1.73 (m, 3H), 1.01 (t, $J = 2.5$ Hz, 6H). MS (ESI $^+$ ) $m/z$ (rel intensity): 210.2 ( $[\text{M} + \text{H}]^+$ , 100).                                                                                                                                              |
| 128 | Lys-boroAla |  | $^1\text{H NMR (D}_2\text{O)}$ $\delta$ 4.00 (t, $J = 6.6$ Hz, 1H), 3.02 - 2.92 (m, 3H), 1.96 - 1.88 (m, 2H), 1.76 - 1.66 (m, 2H), 1.50 - 1.40 (m, 2H), 1.18 (d, $J = 7.5$ Hz, 3H).                                                                                                                                                                                                                                                         |

|     |             |                                                                                      |                                                                                                                                                                                                                                                                                                                                                                                                                                    |
|-----|-------------|--------------------------------------------------------------------------------------|------------------------------------------------------------------------------------------------------------------------------------------------------------------------------------------------------------------------------------------------------------------------------------------------------------------------------------------------------------------------------------------------------------------------------------|
|     |             |                                                                                      | MS (ESI <sup>+</sup> ) <i>m/z</i> (rel intensity): 399.3 ([2 × (M - H <sub>2</sub> O) + H] <sup>+</sup> , 48), 200.2 ([M - H <sub>2</sub> O + H] <sup>+</sup> , 20), 182.2 ([M - 2 × H <sub>2</sub> O + H] <sup>+</sup> , 100).                                                                                                                                                                                                    |
| 129 | Lys-boroGly | 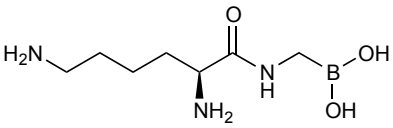    | <sup>1</sup> H NMR (D <sub>2</sub> O) δ 3.96 (t, <i>J</i> = 6.7 Hz, 1H), 2.98 (t, <i>J</i> = 2.6 Hz, 2H), 2.80 (d, <i>J</i> = 16.9 Hz, 1H), 2.71 (d, <i>J</i> = 16.9 Hz, 1H), 1.98 - 1.80 (m, 2H), 1.74 - 1.63 (m, 2H), 1.48 - 1.37 (m, 2H). MS (ESI <sup>+</sup> ) <i>m/z</i> (rel Intensity): 168.2 ([M - 2H <sub>2</sub> O + H] <sup>+</sup> , 100), 186.2 ([M - H <sub>2</sub> O + H] <sup>+</sup> , 65).                      |
| 130 | Lys-boroLeu |     | <sup>1</sup> H NMR (D <sub>2</sub> O) δ 4.0 (dd, <i>J</i> = 6.7, 6.6 Hz, 1H), 2.92 (m, 3H), 1.96 - 1.87 (m, 2H), 1.73 - 1.67 (m, 2H), 1.58 - 1.36 (m, 5H), 0.90 (t, <i>J</i> = 6.0 Hz, 6H). MS (ESI <sup>+</sup> ) <i>m/z</i> (rel intensity): 242.1 ([M - H <sub>2</sub> O + H] <sup>+</sup> , 100).                                                                                                                              |
| 131 | Lys-boroNva |    | <sup>1</sup> H NMR (D <sub>2</sub> O): δ 3.99 (t, <i>J</i> = 6.6 Hz, 1H), 3.01 - 2.88 (m, 3H), 1.90 - 1.86 (m, 2H), 1.75 - 1.30 (m, 8H), 0.89 (t, <i>J</i> = 7.2 Hz, 3H). MS (ESI <sup>+</sup> ) <i>m/z</i> (rel intensity): 455.3 ([2 × (M - H <sub>2</sub> O) + H] <sup>+</sup> , 26), 228.2 ([M - H <sub>2</sub> O + H] <sup>+</sup> , 34), 210.2 ([M - 2 × H <sub>2</sub> O + H] <sup>+</sup> , 100).                          |
| 132 | Lys-boroPhe |  | <sup>1</sup> H NMR (D <sub>2</sub> O) δ 7.45 - 7.25 (m, 5H), 3.92 (dd, <i>J</i> = 6.6, 6.3 Hz, 1H), 3.26 (dd, <i>J</i> = 9.8, 6.3 Hz, 1H), 3.10 - 2.85 (m, 4H), 2.10 - 1.61 (m, 4H), 1.42 - 1.31 (m, 2H). MS (ESI <sup>+</sup> ) <i>m/z</i> (rel Intensity): 259.2 ([M - H <sub>2</sub> O - NH <sub>3</sub> + H] <sup>+</sup> , 100), 276.2 ([M - H <sub>2</sub> O + H] <sup>+</sup> , 80).                                        |
| 133 | Lys-boroPro |   | 34                                                                                                                                                                                                                                                                                                                                                                                                                                 |
| 134 | Lys-boroSar |   | <sup>1</sup> H NMR (D <sub>2</sub> O) δ 4.63 (t, <i>J</i> = 6.6 Hz, 1H), 3.22 (s, 3H), 3.00 (t, <i>J</i> = 7.1 Hz, 2H), 2.50 (s, 2H), 2.03 - 1.94 (m, 2H), 1.77 - 1.66 (m, 2H), 1.56 - 1.43 (m, 2H). <sup>13</sup> C NMR (D <sub>2</sub> O) δ 173.56, 50.31, 50.23, 47.56, 41.54, 38.87, 32.04, 28.89, 23.58, 23.24. MS (ESI <sup>+</sup> ) <i>m/z</i> (rel intensity): 200.1 ([M - 2 × H <sub>2</sub> O + H] <sup>+</sup> , 100). |

|     |                           |                                                                                     |                                                                                                                                                                                                                                                                                                                                                                                                                                                                                                      |
|-----|---------------------------|-------------------------------------------------------------------------------------|------------------------------------------------------------------------------------------------------------------------------------------------------------------------------------------------------------------------------------------------------------------------------------------------------------------------------------------------------------------------------------------------------------------------------------------------------------------------------------------------------|
| 135 | Lys-Pro-CN                | 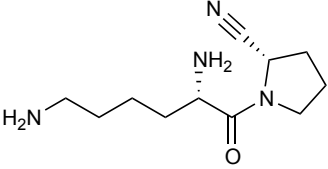   | 44                                                                                                                                                                                                                                                                                                                                                                                                                                                                                                   |
| 136 | MeOSu-Ala-Ala-Pro-boroAla |   | <sup>1</sup> H NMR (D <sub>2</sub> O) δ 4.61 (q, <i>J</i> = 7.1 Hz, 1H), 4.52 (dd, <i>J</i> = 8.5, 5.0 Hz, 1H), 4.30 (q, <i>J</i> = 7.2 Hz, 1H), 3.84 - 3.72 (m, 3H), 3.71 (s, 3H), 2.75 - 2.55 (m, 4H), 2.40 - 2.30 (m, 1H), 2.12 - 1.99 (m, 3H), 1.39 (d, <i>J</i> = 7.2 Hz, 3H), 1.37 (d, <i>J</i> = 7.9 Hz, 3H), 1.07 (d, <i>J</i> = 7.7 Hz, 3H). MS (ESI <sup>+</sup> ) <i>m/z</i> (rel intensity): 425.2 ([M - H <sub>2</sub> O + H] <sup>+</sup> , 100).                                      |
| 137 | Met-boroAla               |    | <sup>1</sup> H NMR (D <sub>2</sub> O) δ 4.11 (t, <i>J</i> = 6.7 Hz, 0.7H, <i>trans</i> -form), 3.90 - 3.80 (m, 0.2H, <i>cis</i> -form), 2.93 (q, <i>J</i> = 7.5 Hz, 1H), 2.69 - 2.59 (m, 2H), 2.25 - 2.10 (m, 5H), 1.18 (d, <i>J</i> = 7.5 Hz, 2.5H, <i>trans</i> -form), 1.08 (d, <i>J</i> = 7.3 Hz, 0.6H, <i>cis</i> -form). MS (ESI <sup>+</sup> ) <i>m/z</i> (rel intensity): 405.2 ([2 × (M - H <sub>2</sub> O) + H] <sup>+</sup> , 100), 203.3 ([M - H <sub>2</sub> O + H] <sup>+</sup> , 24). |
| 138 | Met-boroGly               |  | <sup>1</sup> H NMR (D <sub>2</sub> O) δ 4.12 (t, <i>J</i> = 6.7 Hz, 1H), 2.83 (t, <i>J</i> = 16.9 Hz, 1H), 2.74 (d, <i>J</i> = 16.9 Hz, 1H), 2.54 - 2.70 (m, 2H), 2.16 - 2.21 (m, 2H), 2.12 (s, 3H). MS (ESI <sup>+</sup> ) <i>m/z</i> (rel Intensity): 189.0 ([M - H <sub>2</sub> O + H] <sup>+</sup> , 100), 207.0 ([M + H] <sup>+</sup> , 15).                                                                                                                                                    |
| 139 | Met-boroLeu               |  | <sup>1</sup> H NMR (D <sub>2</sub> O) δ 4.05 (t, <i>J</i> = 6.7 Hz, 1H), 2.87 (m, 1H), 2.55 - 2.46 (m, 2H), 2.12 - 2.04 (m, 2H), 2.01 (s, 3H), 1.50 - 1.25 (m, 3H), 0.82 - 0.77 (m, 6H). MS (ESI <sup>+</sup> ) <i>m/z</i> (rel intensity): 245.0 ([M - H <sub>2</sub> O + H] <sup>+</sup> , 60), 489.2 ([2 × (M - H <sub>2</sub> O) + H] <sup>+</sup> , 100).                                                                                                                                       |
| 140 | Met-boroNva               |  | <sup>1</sup> H NMR (D <sub>2</sub> O): δ 4.14 (t, <i>J</i> = 6.7 Hz, 1H), 2.92 (t, <i>J</i> = 7.9 Hz, 1H), 2.74 - 2.58 (m, 2H), 2.37 - 2.14 (m, 2H), 2.12 (s, 3H), 1.58 - 1.51 (m, 2H), 1.39 - 1.29 (m, 2H), 0.91 (t, <i>J</i> = 7.3 Hz, 3H). MS (ESI <sup>+</sup> ) <i>m/z</i> (rel intensity): 461.3 ([2 ×                                                                                                                                                                                         |

|     |                              |                                                                                     |                                                                                                                                                                                                                                                                                                                                                                                                                                                                       |
|-----|------------------------------|-------------------------------------------------------------------------------------|-----------------------------------------------------------------------------------------------------------------------------------------------------------------------------------------------------------------------------------------------------------------------------------------------------------------------------------------------------------------------------------------------------------------------------------------------------------------------|
|     |                              |                                                                                     | (M - H <sub>2</sub> O) + H] <sup>+</sup> , 83), 271.1 ([M + Na] <sup>+</sup> , 4), 231.1 ([M - H <sub>2</sub> O + H] <sup>+</sup> , 100).                                                                                                                                                                                                                                                                                                                             |
| 141 | Met-boroPhe                  | 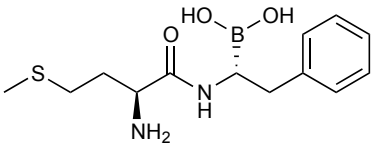   | <sup>1</sup> H NMR (D <sub>2</sub> O) δ 7.45 - 7.25 (m, 5H), 4.03 (m, 1H), 3.24 (m, 1H), 3.02 - 2.80 (m, 2H), 2.52 - 2.47 (m, 2H), 2.13 - 1.90 (m, 5H). MS (ESI <sup>+</sup> ) <i>m/z</i> (rel Intensity): 279.1 ([M - H <sub>2</sub> O + H] <sup>+</sup> , 100), 557.2 ([2 x (M - H <sub>2</sub> O) + H] <sup>+</sup> , 40).                                                                                                                                         |
| 142 | Met-boroPro                  |    | <sup>1</sup> H NMR (D <sub>2</sub> O) δ 4.40 (dd, <i>J</i> = 7.0, 5.5 Hz, 1H), 3.69 (t, <i>J</i> = 8.8 Hz, 1H), 3.47 (dd, <i>J</i> = 9.6, 7.1 Hz, 1H), 3.04 (dd, <i>J</i> = 7.7, 6.6 Hz, 1H), 2.67 - 2.59 (m, 2H), 2.20 - 2.14 (m, 2H), 2.12 (s, 3H), 1.74 - 1.60 (m, 2H), 1.45 - 1.30 (m, 2H). MS (ESI <sup>+</sup> ) <i>m/z</i> (rel intensity): 229.1 ([M - H <sub>2</sub> O + H] <sup>+</sup> , 40), 457.3 ([2 x (M - H <sub>2</sub> O) + H] <sup>+</sup> , 100). |
| 143 | Met-boroSar                  |    | <sup>1</sup> H NMR (D <sub>2</sub> O) δ 4.76 (br, 1H), 3.24 (s, 3H), 2.66 (t, <i>J</i> = 7.0 Hz, 2H), 2.55 (s, 2H), 2.24 (dt, <i>J</i> = 6.9, 7.0 Hz, 2H), 2.12 (s, 3H). <sup>13</sup> C NMR (D <sub>2</sub> O) δ 173.19, 50.32, 49.58, 47.43, 38.85, 31.59, 30.58, 16.58. MS (ESI <sup>+</sup> ) <i>m/z</i> (rel intensity): 203.1 ([M - H <sub>2</sub> O + H] <sup>+</sup> , 100).                                                                                  |
| 144 | Met-Pro-CN                   |  | <sup>1</sup> H NMR (D <sub>2</sub> O) δ 4.87 (dd, <i>J</i> = 7.5, 5.2 Hz, 1H), 4.48 (dd, <i>J</i> = 6.4, 6.0 Hz, 1H), 3.81 - 3.68 (m, 2H), 2.70 (t, <i>J</i> = 7.2 Hz, 2H), 2.43 - 2.16 (m, 5H), 2.14 (br, 1H), 2.13 (s, 3H), 1.74 - 1.60 (m, 2H), 1.45 - 1.30 (m, 2H). MS (ESI <sup>+</sup> ) <i>m/z</i> (rel intensity): 228.1 ([M + H] <sup>+</sup> , 100).                                                                                                        |
| 145 | N-(1-isoquinoyl)-Lys-boroMet |  | <sup>1</sup> H NMR (D <sub>2</sub> O) δ 8.25 (d, <i>J</i> = 5.7 Hz, 1H), 8.13 (d, <i>J</i> = 8.3 Hz, 1H), 7.95 - 7.83 (m, 2H), 7.70 - 7.50 (m, 2H), 4.60 (m, 1H), 2.78 (dd, <i>J</i> = 7.3, 7.2 Hz, 1H), 2.57 (dd, <i>J</i> = 7.9, 6.7 Hz, 1H), 2.35 (dd, <i>J</i> = 7.5, 7.2 Hz, 2H), 1.85 (s, 3H), 1.80 - 1.30 (m, 8H). MS (ESI <sup>+</sup> ) <i>m/z</i> (rel Intensity): 415.2 ([M - H <sub>2</sub> O + H] <sup>+</sup> , 100).                                   |

|     |                                              |                                                                                     |                                                                                                                                                                                                                                                                                                                                                                                                                                                                                                       |
|-----|----------------------------------------------|-------------------------------------------------------------------------------------|-------------------------------------------------------------------------------------------------------------------------------------------------------------------------------------------------------------------------------------------------------------------------------------------------------------------------------------------------------------------------------------------------------------------------------------------------------------------------------------------------------|
| 146 | N-(1-naphthyl)-Gly-Pro-Ala-boroPro Thioamide | 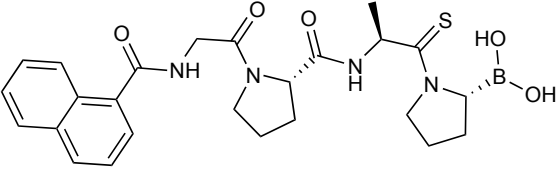  | <sup>1</sup> H NMR (DMSO- <i>d</i> <sub>6</sub> ): δ 8.60 - 8.55 (m, 1H), 8.36 - 8.34 (m, 1H), 8.20 - 8.10 (m, 1H), 8.02 - 7.98 (m, 2H), 7.63 - 7.50 (m, 4H), 4.80 - 4.60 (m, 1H), 4.59 - 4.40 (m, 1H), 4.39 - 4.15 (br, 2H), 3.90 - 3.60 (br, 4H), 1.98 - 1.74 (m, 7H), 1.25 (d, 3H, <i>J</i> = 7.2 Hz). MS (ESI <sup>+</sup> ) <i>m/z</i> (rel intensity): 493.2 ([M - H <sub>2</sub> O + H] <sup>+</sup> , 100).                                                                                   |
| 147 | N-(1-naphthoyl)-Lys-boroMet                  |    | <sup>1</sup> H NMR (D <sub>2</sub> O) δ 7.90 - 7.78 (m, 3H), 7.52 - 7.30 (m, 4H), 4.55 (dd, <i>J</i> = 8.1, 5.4 Hz, 1H), 2.81 (t, <i>J</i> = 7.2 Hz, 2H), 2.58 (m, 1H), 2.40 (t, <i>J</i> = 7.2 Hz, 2H), 1.87 (s, 3H), 1.80 - 1.30 (m, 8H). MS (ESI <sup>+</sup> ) <i>m/z</i> (rel Intensity): 414.2 ([M - H <sub>2</sub> O + H] <sup>+</sup> , 100).                                                                                                                                                 |
| 148 | N-(1-naphthalenecarbonyl)-Gly-boroPro        |    | 42                                                                                                                                                                                                                                                                                                                                                                                                                                                                                                    |
| 149 | N-(2-(1H-indole-3-yl)acetyl)-Lys-boroMet     |  | <sup>1</sup> H NMR (D <sub>2</sub> O) δ 7.65 (d, <i>J</i> = 7.9 Hz, 1H), 7.56 (d, <i>J</i> = 8.0 Hz, 1H), 7.37 (s, 1H), 7.30 (dd, <i>J</i> = 8.0, 7.0 Hz, 1H), 7.21 (dd, <i>J</i> = 7.9, 7.0 Hz, 1H), 4.47 (dd, <i>J</i> = 9.4, 5.5 Hz, 1H), 3.84 (d, <i>J</i> = 4.4 Hz, 2H), 2.85 - 2.65 (m, 3H), 2.45 (t, <i>J</i> = 7.5 Hz, 2H), 2.06 (s, 3H), 1.90 - 1.60 (m, 6H), 1.50 - 1.40 (m, 2H). MS (ESI <sup>+</sup> ) <i>m/z</i> (rel Intensity): 417.2 ([M - H <sub>2</sub> O + H] <sup>+</sup> , 100). |
| 150 | N-(2-(2-chlorophenyl)acetyl)-Lys-boroMet     |  | <sup>1</sup> H NMR (D <sub>2</sub> O) δ 7.22 (m, 1H), 7.09 (m, 3H), 4.24 (m, 1H), 3.6 (s, 2H), 2.73 (m, 2H), 2.44 (m, 1H), 2.28 (m, 2H), 1.82 (s, 3H), 1.80 - 1.30 (m, 6H), 1.27 - 1.10 (m, 2H). MS (ESI <sup>+</sup> ) <i>m/z</i> (rel Intensity): 412.2 ([M - H <sub>2</sub> O + H] <sup>+</sup> , 100).                                                                                                                                                                                            |

|     |                                              |                                                                                     |                                                                                                                                                                                                                                                                                                                                                                                                                                                                                                                       |
|-----|----------------------------------------------|-------------------------------------------------------------------------------------|-----------------------------------------------------------------------------------------------------------------------------------------------------------------------------------------------------------------------------------------------------------------------------------------------------------------------------------------------------------------------------------------------------------------------------------------------------------------------------------------------------------------------|
| 151 | N-(2-(2-fluorophenyl)acetyl)-Lys-boroMet     | 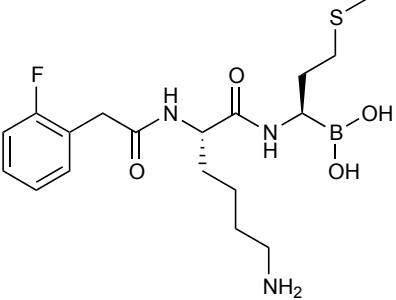   | <sup>1</sup> H NMR (D <sub>2</sub> O) δ 7.45 - 7.30 (m, 2H), 7.26 - 7.15 (m, 2H), 4.48 (dd, <i>J</i> = 8.8, 5.8 Hz, 1H), 3.76 (s, 2H), 3.0 (t, <i>J</i> = 7.5 Hz, 2H), 2.75 (dd, <i>J</i> = 8.5, 6.3 Hz, 1H), 2.54 (dd, <i>J</i> = 7.6, 7.3 Hz, 2H), 2.09 (s, 3H), 1.90 - 1.60 (m, 6H), 1.50 - 1.40 (m, 2H). MS (ESI <sup>+</sup> ) <i>m/z</i> (rel Intensity): 396.1 ([M - H <sub>2</sub> O + H] <sup>+</sup> , 100).                                                                                                |
| 152 | N-(2-(2-pyridinyl)acetyl)-Lys-boroMet        |    | <sup>1</sup> H NMR (D <sub>2</sub> O) δ 8.38 (d, <i>J</i> = 5.5 Hz, 1H), 8.29 (m, 1H), 7.74 - 7.68 (m, 2H), 4.18 (dd, <i>J</i> = 7.3, 7.0 Hz, 1H), 3.73 (s, 2H), 2.71 (dd, <i>J</i> = 7.6, 7.4 Hz, 2H), 2.44 (m, 1H), 2.22 (t, <i>J</i> = 7.4 Hz, 2H), 1.77 (s, 3H), 1.75 - 1.15 (m, 8H). MS (ESI <sup>+</sup> ) <i>m/z</i> (rel Intensity): 190.2 ([M - H <sub>2</sub> O]/2 + H] <sup>+</sup> , 100), 379.2 ([M - H <sub>2</sub> O + H] <sup>+</sup> , 85).                                                          |
| 153 | N-(2-(2,5-difluorophenyl)acetyl)-Lys-boroMet |   | <sup>1</sup> H NMR (D <sub>2</sub> O) δ 7.22 - 7.08 (m, 3H), 4.47 (dd, <i>J</i> = 8.7, 6.0 Hz, 1H), 3.75 (s, 2H), 3.0 (t, <i>J</i> = 7.5 Hz, 2H), 2.76 (dd, <i>J</i> = 8.3, 6.3 Hz, 2H), 2.54 (dd, <i>J</i> = 7.5, 7.3 Hz, 2H), 2.09 (s, 3H), 1.90 - 1.60 (m, 6H), 1.50 - 1.40 (m, 2H). MS (ESI <sup>+</sup> ) <i>m/z</i> (rel Intensity): 414.2 ([M - H <sub>2</sub> O + H] <sup>+</sup> , 100).                                                                                                                     |
| 154 | N-(2-(2,6-dichlorophenyl)acetyl)-Lys-boroMet |  | <sup>1</sup> H NMR (D <sub>2</sub> O) δ 7.20 - 7.15 (m, 2H), 7.05 - 7.01 (m, 1H), 4.24 (m, 1H), 3.86 (s, 2H), 2.75 - 2.70 (m, 2H), 2.45 - 2.41 (m, 1H), 2.30 - 2.25 (m, 2H), 1.81 (s, 3H), 1.70 - 1.20 (m, 8H). MS (ESI <sup>+</sup> ) <i>m/z</i> (rel Intensity): 446.1 ([M - H <sub>2</sub> O + H] <sup>+</sup> , 100), 448.1 ([M - H <sub>2</sub> O + H] <sup>+</sup> , 60).                                                                                                                                       |
| 155 | N-(2-(3-pyridinyl)acetyl)-Lys-boroMet        |  | <sup>1</sup> H NMR (D <sub>2</sub> O) δ 8.5 (m, 2H), 8.27 (d, <i>J</i> = 7.9 Hz, 1H), 7.80 (dd, <i>J</i> = 7.9, 7.1 Hz, 1H), 4.18 (t, <i>J</i> = 6.9 Hz, 1H), 3.73 (s, 2H), 2.73 (dd, <i>J</i> = 7.4, 7.0 Hz, 2H), 2.44 (t, <i>J</i> = 7.1 Hz, 1H), 2.23 (dd, <i>J</i> = 7.2, 7.1 Hz, 2H), 1.78 (s, 3H), 1.75 - 1.30 (m, 6H), 1.25 - 1.10 (m, 2H). MS (ESI <sup>+</sup> ) <i>m/z</i> (rel Intensity): 190.2 ([M - H <sub>2</sub> O]/2 + H] <sup>+</sup> , 100), 379.2 ([M - H <sub>2</sub> O + H] <sup>+</sup> , 60). |

|     |                                               |                                                                                      |                                                                                                                                                                                                                                                                                                                                                                                                                                           |
|-----|-----------------------------------------------|--------------------------------------------------------------------------------------|-------------------------------------------------------------------------------------------------------------------------------------------------------------------------------------------------------------------------------------------------------------------------------------------------------------------------------------------------------------------------------------------------------------------------------------------|
| 156 | N-(2-(3,5-dichlorophenyl)acetyl)-Lys-boroMet  | 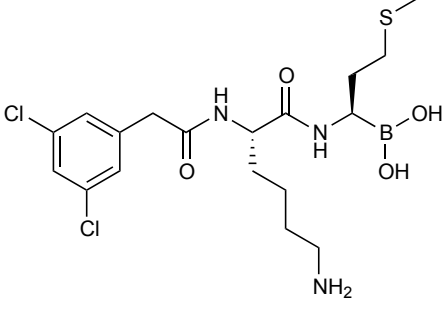   | <sup>1</sup> H NMR (D <sub>2</sub> O) δ 7.48 (s, 1H), 7.31 (s, 2H), 4.45 (m, 1H), 3.68 (s, 2H), 2.98 (dd, <i>J</i> = 7.8, 7.5 Hz, 2H), 2.78 - 2.70 (m, 1H), 2.51 (dd, <i>J</i> = 7.5, 7.2 Hz, 1H), 2.07 (s, 3H), 1.85 - 1.60 (m, 4H), 1.46 - 1.40 (m, 2H). MS (ESI <sup>+</sup> ) <i>m/z</i> (rel Intensity): 446.1 ([M - H <sub>2</sub> O + H] <sup>+</sup> , 100), 448.1 ([M - H <sub>2</sub> O + H] <sup>+</sup> , 60).                |
| 157 | N-(2-(3,5-difluorophenyl)acetyl)-Lys-boroMet  |    | <sup>1</sup> H NMR (D <sub>2</sub> O) δ 6.92 (m, 3H), 4.45 (t, <i>J</i> = 6.0 Hz, 1H), 3.68 (s, 2H), 2.97 (t, <i>J</i> = 7.3 Hz, 2H), 2.72 (m, 1H), 2.49 (t, <i>J</i> = 7.5 Hz, 2H), 2.07 (s, 3H), 2.00 - 1.60 (m, 6H), 1.46 - 1.40 (m, 2H). MS (ESI <sup>+</sup> ) <i>m/z</i> (rel Intensity): 446.1 ([M - H <sub>2</sub> O + H] <sup>+</sup> , 100), 414.2 ([M - H <sub>2</sub> O + H] <sup>+</sup> , 60).                              |
| 158 | N-(2-(3,5-difluorophenyl)acetyl)-Trp-boroMet  |   | <sup>1</sup> H NMR (D <sub>2</sub> O-CD <sub>3</sub> CN, 4 : 1) δ 7.68 (d, <i>J</i> = 6.8 Hz, 1H), 7.53 (d, <i>J</i> = 7.9 Hz, 1H), 7.25 - 7.15 (m, 3H), 6.91 (m, 1H), 6.74 (m, 2H), 3.60 (s, 2H), 3.45 - 3.25 (m, 2H), 2.64 (m, 1H), 2.22 (s, 3H), 1.97 - 1.25 (m, 4H). MS (ESI <sup>+</sup> ) <i>m/z</i> (rel Intensity): 472.1 ([M - H <sub>2</sub> O + H] <sup>+</sup> , 100), 512.3 ([M - H <sub>2</sub> O + Na] <sup>+</sup> , 10). |
| 159 | N-(2-(3,5-dimethoxyphenyl)acetyl)-Lys-boroMet |  | <sup>1</sup> H NMR (D <sub>2</sub> O) δ 6.58 (s, 3H), 4.45 (t, <i>J</i> = 5.5 Hz, 1H), 3.85 (s, 6H), 3.62 (s, 2H), 2.96 (dd, <i>J</i> = 7.6, 7.5 Hz, 2H), 2.73 (dd, <i>J</i> = 8.5, 6.2 Hz, 1H), 2.47 (t, <i>J</i> = 7.5 Hz, 2H), 2.06 (s, 3H), 2.00 - 1.60 (m, 6H), 1.50 - 1.40 (m, 2H). MS (ESI <sup>+</sup> ) <i>m/z</i> (rel Intensity): 438.2 ([M - H <sub>2</sub> O + H] <sup>+</sup> , 100).                                       |
| 160 | N-(2-(4-hydroxyphenyl)acetyl)-Lys-boroMet     |  | <sup>1</sup> H NMR (D <sub>2</sub> O) δ 6.94 (d, <i>J</i> = 7.1 Hz, 2H), 6.18 (d, <i>J</i> = 7.1 Hz, 2H), 4.17 (m, 1H), 3.31 (s, 2H), 2.67 (m, 2H), 2.37 (m, 1H), 2.18 (m, 2H), 1.79 (s, 3H), 1.70 - 1.30 (m, 6H), 1.20 - 1.10 (m, 2H). MS (ESI <sup>+</sup> ) <i>m/z</i> (rel Intensity): 394.1 ([M - H <sub>2</sub> O + H] <sup>+</sup> , 100).                                                                                         |



|     |                                                |                                                                                     |                                                                                                                                                                                                                                                                                                                                                                                                                                                                                                          |
|-----|------------------------------------------------|-------------------------------------------------------------------------------------|----------------------------------------------------------------------------------------------------------------------------------------------------------------------------------------------------------------------------------------------------------------------------------------------------------------------------------------------------------------------------------------------------------------------------------------------------------------------------------------------------------|
| 161 | N-(2-(4-methoxyphenyl)acetyl)-Lys-boroMet      | 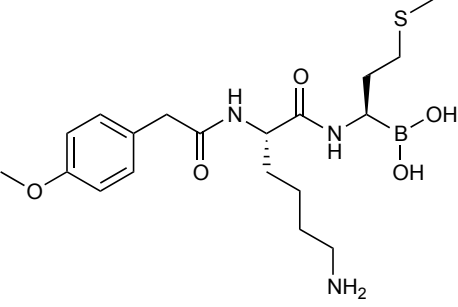  | <sup>1</sup> H NMR (D <sub>2</sub> O) δ 7.30 (d, <i>J</i> = 8.7 Hz, 2H), 7.02 (d, <i>J</i> = 8.7 Hz, 2H), 4.44 (t, <i>J</i> = 6.0 Hz, 1H), 3.86 (s, 3H), 3.62 (s, 2H), 2.97 (dd, <i>J</i> = 7.8, 7.4 Hz, 2H), 2.72 (dd, <i>J</i> = 8.5, 6.2 Hz, 1H), 2.47 (dd, <i>J</i> = 7.6, 7.4 Hz, 2H), 2.07 (s, 3H), 2.00 - 1.60 (m, 6H), 1.50 - 1.40 (m, 2H). MS (ESI <sup>+</sup> ) <i>m/z</i> (rel Intensity): 408.2 ([M - H <sub>2</sub> O + H] <sup>+</sup> , 100).                                            |
| 162 | N-(2-(4-pyridinyl)acetyl)-Lys-boroMet          |    | <sup>1</sup> H NMR (D <sub>2</sub> O) δ 8.48 (d, <i>J</i> = 5.7 Hz, 2H), 7.72 (d, <i>J</i> = 5.7 Hz, 2H), 4.18 (dd, <i>J</i> = 6.9, 6.8 Hz, 1H), 3.79 (s, 2H), 2.72 (t, <i>J</i> = 7.0 Hz, 2H), 2.78 (dd, <i>J</i> = 7.3, 6.8 Hz, 1H), 2.23 (dd, <i>J</i> = 7.1, 7.0 Hz, 2H), 1.79 (s, 3H), 1.75 - 1.30 (m, 6H), 1.25 - 1.10 (m, 2H). MS (ESI <sup>+</sup> ) <i>m/z</i> (rel Intensity): 190.2 ([M - H <sub>2</sub> O]/2 + H] <sup>+</sup> , 100), 379.2 ([M - H <sub>2</sub> O + H] <sup>+</sup> , 50). |
| 163 | N-(2-(5-methoxyindole-3-yl)acetyl)-Lys-boroMet |  | <sup>1</sup> H NMR (D <sub>2</sub> O) δ 7.47 (d, <i>J</i> = 8.9 Hz, 1H), 7.36 (s, 1H), 7.19 (d, <i>J</i> = 8.0 Hz, 1H), 6.97 (dd, <i>J</i> = 8.9, 8.0 Hz, 1H), 4.47 (dd, <i>J</i> = 5.2, 4.2 Hz, 1H), 3.90 (s, 3H), 3.80 (s, 2H), 2.80 (t, <i>J</i> = 7.2 Hz, 2H), 2.70 (t, <i>J</i> = 6.3 Hz, 1H), 2.42 (t, <i>J</i> = 7.5 Hz, 2H), 2.05 (s, 3H), 1.90 - 1.50 (m, 6H), 1.35 - 1.20 (m, 2H). MS (ESI <sup>+</sup> ) <i>m/z</i> (rel Intensity): 447.2 ([M - H <sub>2</sub> O + H] <sup>+</sup> , 100).   |
| 164 | N-(2-(9-phenanthryl)acetyl)-Lys-boroMet        |  | <sup>1</sup> H NMR (D <sub>2</sub> O) δ 8.60 (s, 1H), 8.23 (d, <i>J</i> = 8.6 Hz, 2H), 8.13 (d, <i>J</i> = 8.3 Hz, 2H), 7.64 - 7.52 (m, 4H), 4.39 (dd, <i>J</i> = 9.3, 5.5 Hz, 1H), 2.85 - 2.80 (m, 2H), 2.63 (m, 1H), 2.33 (dd, <i>J</i> = 7.6, 7.4 Hz, 1H), 1.89 (s, 1H), 1.81 - 1.51 (m, 6H), 1.40 - 1.29 (m, 2H). MS (ESI <sup>+</sup> ) <i>m/z</i> (rel Intensity): 478.2 ([M - H <sub>2</sub> O + H] <sup>+</sup> , 100).                                                                          |

|     |                                             |                                                                                      |                                                                                                                                                                                                                                                                                                                                                                                                                                                                   |
|-----|---------------------------------------------|--------------------------------------------------------------------------------------|-------------------------------------------------------------------------------------------------------------------------------------------------------------------------------------------------------------------------------------------------------------------------------------------------------------------------------------------------------------------------------------------------------------------------------------------------------------------|
| 165 | N-(2-(morpholin-4-yl)acetyl)-Lys-boroMet    | 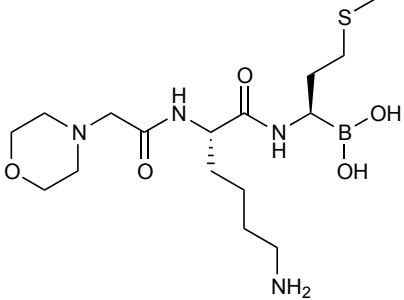    | <sup>1</sup> H NMR (D <sub>2</sub> O) δ 4.48 (dd, <i>J</i> = 5.1, 4.5 Hz, 1H), 4.13 (s, 2H), 4.04 (m, 4H), 3.46 (m, 4H), 3.01 (t, <i>J</i> = 7.5 Hz, 2H), 2.83 (dd, <i>J</i> = 8.1, 6.6 Hz, 1H), 2.58 (dd, <i>J</i> = 7.5, 7.2 Hz, 2H), 2.12 (s, 3H), 1.95 - 1.60 (m, 6H), 1.50 - 1.30 (m, 2H). MS (ESI <sup>+</sup> ) <i>m/z</i> (rel Intensity): 194.2 ([M - H <sub>2</sub> O]/2 + H) <sup>+</sup> , 100, 387.2 ([M - H <sub>2</sub> O + H] <sup>+</sup> , 98). |
| 166 | N-(2-(naphthalen-1-yl)acetyl)-Lys-boroMet   |    | <sup>1</sup> H NMR (D <sub>2</sub> O) δ 7.72 - 7.70 (m, 3H), 7.40 - 7.10 (m, 4H), 4.21 (m, 1H), 3.93 (s, 2H), 2.79 (m, 2H), 2.58 (m, 1H), 2.19 (m, 2H), 1.76 (s, 3H), 1.75 - 1.30 (m, 6H), 1.06 (m, 2H). MS (ESI <sup>+</sup> ) <i>m/z</i> (rel Intensity): 428.2 ([M - H <sub>2</sub> O + H] <sup>+</sup> , 100).                                                                                                                                                |
| 167 | N-(2-(naphthalene-2-yl)acetyl)-Lys-boroMet  |   | <sup>1</sup> H NMR (D <sub>2</sub> O) δ 7.71 - 7.68 (m, 3H), 7.60 (s, 1H), 7.33 - 7.29 (m, 2H), 7.20 (d, <i>J</i> = 7.9 Hz, 1H), 4.20 (m, 1H), 3.58 (s, 2H), 2.56 (t, <i>J</i> = 7.4 Hz, 2H), 2.40 (m, 1H), 2.11 (t, <i>J</i> = 7.2 Hz, 2H), 1.71 (s, 3H), 1.70 - 1.30 (m, 6H), 1.10 - 0.96 (m, 2H). MS (ESI <sup>+</sup> ) <i>m/z</i> (rel Intensity): 428.2 ([M - H <sub>2</sub> O + H] <sup>+</sup> , 100).                                                    |
| 168 | N-(2-(pentafluorophenyl)acetyl)-Lys-boroMet |  | <sup>1</sup> H NMR (D <sub>2</sub> O) δ 4.48 (dd, <i>J</i> = 8.5, 6.1 Hz, 1H), 3.88 (s, 2H), 3.02 (t, <i>J</i> = 7.5 Hz, 2H), 2.77 (dd, <i>J</i> = 8.5, 6.2 Hz, 1H), 2.55 (dd, <i>J</i> = 7.6, 7.3 Hz, 2H), 2.10 (s, 3H), 1.95 - 1.60 (m, 6H), 1.55 - 1.40 (m, 2H). MS (ESI <sup>+</sup> ) <i>m/z</i> (rel Intensity): 408.1 ([M - H <sub>2</sub> O + H] <sup>+</sup> , 100).                                                                                     |
| 169 | N-(2-(thiophen-2-yl)acetyl)-Lys-boroMet     |   | <sup>1</sup> H NMR (D <sub>2</sub> O) δ 7.10 (d, <i>J</i> = 4.8 Hz, 1H), 6.80 - 6.70 (m, 2H), 4.20 (dd, <i>J</i> = 5.7, 5.4 Hz, 1H), 3.63 (s, 2H), 2.69 (t, <i>J</i> = 7.4 Hz, 2H), 2.42 (dd, <i>J</i> = 7.2, 6.7 Hz, 1H), 2.25 (t, <i>J</i> = 7.4 Hz, 2H), 1.82 (s, 3H), 1.60 - 1.35 (m, 6H), 1.39 - 1.16 (m, 2H). MS (ESI <sup>+</sup> ) <i>m/z</i> (rel Intensity): 384.1 ([M - H <sub>2</sub> O + H] <sup>+</sup> , 100).                                     |

|     |                                                  |                                                                                     |                                                                                                                                                                                                                                                                                                                                                                                                                                                                                                                       |
|-----|--------------------------------------------------|-------------------------------------------------------------------------------------|-----------------------------------------------------------------------------------------------------------------------------------------------------------------------------------------------------------------------------------------------------------------------------------------------------------------------------------------------------------------------------------------------------------------------------------------------------------------------------------------------------------------------|
| 170 | N-(2-methoxy-1-naphthoyl)-Lys-boroMet            | 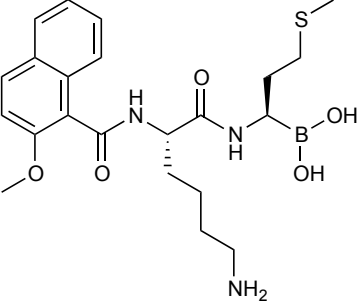   | <sup>1</sup> H NMR (D <sub>2</sub> O) δ 8.08 (d, <i>J</i> = 9.0 Hz, 1H), 7.95 (d, <i>J</i> = 8.2 Hz, 1H), 7.71 (d, <i>J</i> = 8.4 Hz, 1H), 7.65 - 7.45 (m, 3H), 4.01 (s, 3H), 3.03 (t, <i>J</i> = 7.5 Hz, 2H), 2.89 (dd, <i>J</i> = 8.5, 6.3 Hz, 1H), 2.63 (m, 2H), 2.10 (s, 3H), 2.05 - 1.50 (m, 8H). MS (ESI <sup>+</sup> ) <i>m/z</i> (rel Intensity): 444.2 ([M - H <sub>2</sub> O + H] <sup>+</sup> , 100).                                                                                                      |
| 171 | N-(2-oxoindoline-7-carbonyl)-Gly-boroPro         |    | <sup>1</sup> H NMR (D <sub>2</sub> O) δ 7.57 (d, <i>J</i> = 6.9 Hz, 1H), 7.46 (d, <i>J</i> = 6.4 Hz, 1H), 7.15 (dd, <i>J</i> = 6.9, 6.4 Hz, 1H), 4.20 (s, 2H), 3.64 (br, 1H), 3.60 (s, 2H), 3.54 - 3.50 (m, 1H), 3.08 - 3.04 (m, 1H), 2.20 - 2.00 (m, 3H), 1.75 - 1.70 (m, 1H). MS (ESI <sup>+</sup> ) <i>m/z</i> (rel intensity): 314.2 ([M - H <sub>2</sub> O + H] <sup>+</sup> , 100), 617.2 ([2 x (M - H <sub>2</sub> O) + H] <sup>+</sup> , 60).                                                                 |
| 172 | N-(2-phenyl-2-hydroxycarbonyl)acetyl-Lys-boroMet |   | <sup>1</sup> H NMR (D <sub>2</sub> O) δ 7.20 - 7.11 (m, 5H), 4.60 (s, 1H), 4.23 (dd, <i>J</i> = 9.1, 4.8 Hz, 1H), 2.60 - 2.55 (m, 2H), 2.46 (dd, <i>J</i> = 7.8, 7.2 Hz, 2H), 2.40 - 2.20 (m, 2H), 1.84 (s, 3H), 1.55 - 1.50 (m, 1H), 1.49 - 1.41 (m, 4H), 1.35 - 1.25 (m, 2H), 1.10 - 1.03 (m, 2H). MS (ESI <sup>+</sup> ) <i>m/z</i> (rel Intensity): 422.2 ([M - H <sub>2</sub> O + H] <sup>+</sup> , 100).                                                                                                        |
| 173 | N-(2-pyrazinecarbonyl)-Lys-boroMet               |  | <sup>1</sup> H NMR (D <sub>2</sub> O) δ 9.20 (d, <i>J</i> = 1.3 Hz, 1H), 8.85 (d, <i>J</i> = 2.5 Hz, 1H), 8.78 (dd, <i>J</i> = 2.5, 1.3 Hz, 1H), 3.02 (t, <i>J</i> = 7.5 Hz, 2H), 2.82 (dd, <i>J</i> = 8.2, 6.4 Hz, 1H), 2.56 (t, <i>J</i> = 7.5 Hz, 2H), 2.07 (s, 3H), 2.06 - 2.02 (m, 2H), 1.90 - 1.70 (m, 4H), 1.60 - 1.50 (m, 2H). MS (ESI <sup>+</sup> ) <i>m/z</i> (rel Intensity): 366.1 ([M - H <sub>2</sub> O + H] <sup>+</sup> , 100).                                                                      |
| 174 | N-(2-quinolinecarbonyl)-Lys-boroMet              |  | <sup>1</sup> H NMR (D <sub>2</sub> O) δ 8.61 (d, <i>J</i> = 8.5 Hz, 1H), 8.21 (d, <i>J</i> = 8.7 Hz, 1H), 8.14 (d, <i>J</i> = 8.5 Hz, 1H), 8.10 (d, <i>J</i> = 8.5 Hz, 1H), 7.97 (dd, <i>J</i> = 8.5, 7.2 Hz, 1H), 7.81 (dd, <i>J</i> = 8.7, 7.2 Hz, 1H), 3.04 (dd, <i>J</i> = 7.5, 7.3 Hz, 2H), 2.82 (dd, <i>J</i> = 8.5, 6.2 Hz, 1H), 2.56 (t, <i>J</i> = 7.5 Hz, 2H), 2.10 - 2.05 (m, 2H), 2.03 (s, 3H), 1.90 - 1.20 (m, 6H). MS (ESI <sup>+</sup> ) <i>m/z</i> (rel Intensity): 208.0 ([M - H <sub>2</sub> O]/2 + |

|     |                                       |                                                                                      |                                                                                                                                                                                                                                                                                                                                                                           |
|-----|---------------------------------------|--------------------------------------------------------------------------------------|---------------------------------------------------------------------------------------------------------------------------------------------------------------------------------------------------------------------------------------------------------------------------------------------------------------------------------------------------------------------------|
|     |                                       |                                                                                      | $\text{H}]^+$ , 100), 415.1 ( $[\text{M} - \text{H}_2\text{O} + \text{H}]^+$ , 90).                                                                                                                                                                                                                                                                                       |
| 175 | N-(2-quinoxalinecarbonyl)-Lys-boroMet | 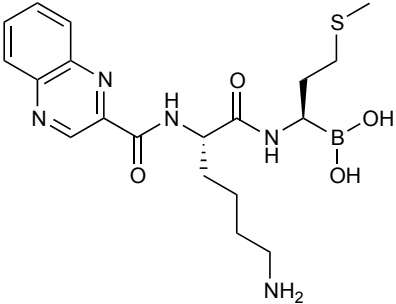    | $^1\text{H NMR (D}_2\text{O)}$ $\delta$ 7.43 - 7.25 (m, 5H), 4.50 (t, $J = 7.3$ Hz, 1H), 3.70 (m, 1H), 3.36 (m, 1H), 2.98 (m, 2H), 2.78 (dd, $J = 8.4, 6.3$ Hz, 1H), 2.51 (t, $J = 7.5$ Hz, 2H), 2.04 (s, 3H), 1.95 - 1.65 (m, 6H), 1.60 - 1.50 (m, 2H). MS (ESI $^+$ ) $m/z$ (rel Intensity): 416.2 ( $[\text{M} - \text{H}_2\text{O} + \text{H}]^+$ , 100).             |
| 176 | N-(3-phenyl)propionyl)-Lys-boroMet    |     | $^1\text{H NMR (D}_2\text{O)}$ $\delta$ 7.15 - 6.99 (m, 5H), 4.03 (dd, $J = 9.4, 5.1$ Hz, 1H), 2.71 - 2.57 (m, 4H), 2.43 - 2.37 (m, 3H), 1.83 (s, 3H), 1.50 - 1.20 (m, 6H), 1.00 - 0.80 (m, 2H). MS (ESI $^+$ ) $m/z$ (rel Intensity): 392.2 ( $[\text{M} - \text{H}_2\text{O} + \text{H}]^+$ , 100).                                                                     |
| 177 | N-(4-fluoro-1-naphthoyl)-Lys-boroMet  |    | $^1\text{H NMR (D}_2\text{O)}$ $\delta$ 7.99 (d, $J = 6.5$ Hz, 1H), 7.89 (d, $J = 6.7$ Hz, 1H), 7.37 (m, 3H), 7.04 (dd, $J = 9.3, 8.5$ Hz, 1H), 4.50 (m, 1H), 2.78 (m, 2H), 2.55 (dd, $J = 7.7, 6.2$ Hz, 1H), 2.36 (m, 2H), 1.84 (s, 3H), 1.80 - 1.25 (m, 8H). MS (ESI $^+$ ) $m/z$ (rel Intensity): 432.2 ( $[\text{M} - \text{H}_2\text{O} + \text{H}]^+$ , 100).       |
| 178 | N-(4-fluorophenylacetyl)-Lys-boroMet  |  | $^1\text{H NMR (D}_2\text{O)}$ $\delta$ 7.02 (m, 2H), 6.87 (m, 2H), 4.20 (dd, $J = 8.6, 5.9$ Hz, 1H), 3.41 (s, 2H), 2.70 (m, 2H), 2.45 - 2.40 (m, 1H), 2.24 (t, $J = 7.3$ Hz, 2H), 1.82 (s, 3H), 1.80 - 1.29 (m, 6H), 1.20 - 1.10 (m, 2H). MS (ESI $^+$ ) $m/z$ (rel Intensity): 396.1 ( $[\text{M} - \text{H}_2\text{O} + \text{H}]^+$ , 100).                           |
| 179 | N-(4-hydroxybenzoyl)-Lys-boroMet      |   | $^1\text{H NMR (D}_2\text{O)}$ $\delta$ 7.78 (d, $J = 8.7$ Hz, 2H), 7.0 (d, $J = 8.7$ Hz, 2H), 4.71 (dd, $J = 8.7, 6.3$ Hz, 1H), 3.03 (dd, $J = 7.6, 7.4$ Hz, 2H), 2.77 (dd, $J = 8.4, 6.3$ Hz, 1H), 2.57 (t, $J = 7.4$ Hz, 2H), 2.06 (s, 3H), 2.00 - 1.500 (m, 8H). MS (ESI $^+$ ) $m/z$ (rel Intensity): 380.1 ( $[\text{M} - \text{H}_2\text{O} + \text{H}]^+$ , 100). |

|     |                                                       |                                                                                      |                                                                                                                                                                                                                                                                                                                                                                                                                                                                                                     |
|-----|-------------------------------------------------------|--------------------------------------------------------------------------------------|-----------------------------------------------------------------------------------------------------------------------------------------------------------------------------------------------------------------------------------------------------------------------------------------------------------------------------------------------------------------------------------------------------------------------------------------------------------------------------------------------------|
| 180 | N-(4-morpholinylcarbonyl)-Lys-boroMet                 | 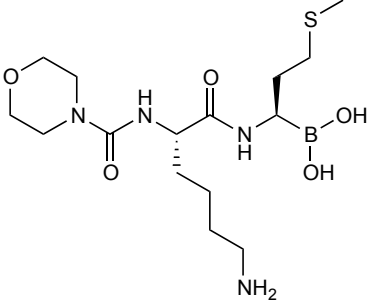    | <sup>1</sup> H NMR (D <sub>2</sub> O) δ 4.83 (m, 1H), 4.13 (dd, <i>J</i> = 7.8, 7.0 Hz, 1H), 3.48 (m, 4H), 3.20 (m, 4H), 2.74 (dd, <i>J</i> = 6.8, 6.7 Hz, 2H), 2.44 - 2.25 (m, 3H), 1.84 (s, 3H), 1.61 - 1.20 (m, 8H). MS (ESI <sup>+</sup> ) <i>m/z</i> (rel Intensity): 373.2 ([M - H <sub>2</sub> O + H] <sup>+</sup> , 100).                                                                                                                                                                   |
| 181 | N-(4-pyrimidinoyl)-Lys-boroMet                        |     | <sup>1</sup> H NMR (D <sub>2</sub> O) δ 9.26 (s, 1H), 9.02 (d, <i>J</i> = 5.1 Hz, 1H), 8.06 (d, <i>J</i> = 5.1 Hz, 1H), 4.68 (br, 1H), 2.97 (dd, <i>J</i> = 8.4, 5.5 Hz, 2H), 2.79 (dd, <i>J</i> = 8.9, 7.2 Hz, 1H), 2.50 (t, <i>J</i> = 7.4 Hz, 2H), 2.01 (s, 3H), 2.00 - 1.45 (m, 8H). MS (ESI <sup>+</sup> ) <i>m/z</i> (rel Intensity): 366.1 ([M - H <sub>2</sub> O + H] <sup>+</sup> , 100).                                                                                                  |
| 182 | N-(4-quinolinoyl)-Lys-boroMet                         |    | <sup>1</sup> H NMR (D <sub>2</sub> O) δ 9.20 (d, <i>J</i> = 5.5 Hz, 1H), 8.29 (d, <i>J</i> = 8.8 Hz, 2H), 8.19 (dd, <i>J</i> = 8.3, 7.4 Hz, 1H), 8.10 (d, <i>J</i> = 8.5 Hz, 1H), 8.02 (dd, <i>J</i> = 8.0, 7.4 Hz, 1H), 3.03 - 2.90 (m, 3H), 2.60 (t, <i>J</i> = 7.2 Hz, 2H), 2.08 (s, 3H), 2.00 - 1.50 (m, 8H). MS (ESI <sup>+</sup> ) <i>m/z</i> (rel Intensity): 208.1 ([M - H <sub>2</sub> O]/2 + H] <sup>+</sup> , 100), 415.2 ([M - H <sub>2</sub> O + H] <sup>+</sup> , 90).                |
| 183 | N-(5-fluoro-1-naphthoyl)-Lys-boroMet                  |  | <sup>1</sup> H NMR (D <sub>2</sub> O) δ 8.08 (d, <i>J</i> = 8.3 Hz, 1H), 7.63 (d, <i>J</i> = 8.6 Hz, 1H), 7.54 (d, <i>J</i> = 7.0 Hz, 1H), 7.43 - 7.30 (m, 2H), 7.08 (dd, <i>J</i> = 9.8, 8.6 Hz, 1H), 4.51 (dd, <i>J</i> = 7.4, 6.9 Hz, 1H), 2.78 (dd, <i>J</i> = 7.4, 7.0 Hz, 2H), 2.53 (t, <i>J</i> = 7.4 Hz, 1H), 2.36 (t, <i>J</i> = 7.2 Hz, 2H), 1.84 (s, 3H), 1.75 - 1.25 (m, 8H). MS (ESI <sup>+</sup> ) <i>m/z</i> (rel Intensity): 432.2 ([M - H <sub>2</sub> O + H] <sup>+</sup> , 100). |
| 184 | N-(5-methyl-3-phenylisoxazole-4-carbonyl)-Lys-boroMet |   | <sup>1</sup> H NMR (D <sub>2</sub> O) δ 7.15 (m, 5H), 4.30 (m, 1H), 2.67 (m, 2H), 2.53 (m, 1H), 2.34 (m, 5H), 1.85 (s, 3H), 1.70 - 0.90 (m, 8H). MS (ESI <sup>+</sup> ) <i>m/z</i> (rel Intensity): 445.2 ([M - H <sub>2</sub> O + H] <sup>+</sup> , 100).                                                                                                                                                                                                                                          |

|     |                                          |                                                                                      |                                                                                                                                                                                                                                                                                                                                                                                                                                                                                                                                                                          |
|-----|------------------------------------------|--------------------------------------------------------------------------------------|--------------------------------------------------------------------------------------------------------------------------------------------------------------------------------------------------------------------------------------------------------------------------------------------------------------------------------------------------------------------------------------------------------------------------------------------------------------------------------------------------------------------------------------------------------------------------|
| 185 | N-(5,7-difluoro-1-naphthoyl)-Lys-boroMet | 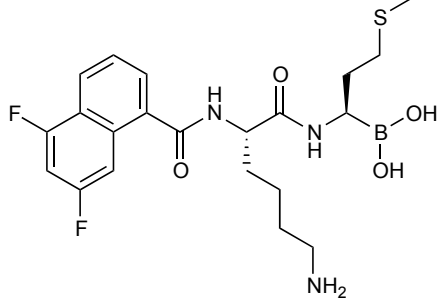   | <sup>1</sup> H NMR (D <sub>2</sub> O) δ 8.05 (d, <i>J</i> = 8.2 Hz, 1H), 7.60 (d, <i>J</i> = 6.5 Hz, 1H), 7.38 (d, <i>J</i> = 7.8 Hz, 2H), 6.99 (t, <i>J</i> = 8.9 Hz, 1H), 4.51 (m, 1H), 2.78 (m, 2H), 2.37 (dd, <i>J</i> = 7.6, 6.6 Hz, 1H), 2.34 (t, <i>J</i> = 6.7 Hz, 2H), 1.83 (s, 3H), 1.80 - 1.25 (m, 8H). MS (ESI <sup>+</sup> ) <i>m/z</i> (rel Intensity): 450.1 ([M - H <sub>2</sub> O + H] <sup>+</sup> , 100).                                                                                                                                             |
| 186 | N-(6-fluoro-1-naphthoyl)-Lys-boroMet     |    | <sup>1</sup> H NMR (D <sub>2</sub> O) δ 7.87 (m, 1H), 7.8 (d, <i>J</i> = 9.8 Hz, 1H), 7.45 - 7.30 (m, 3H), 7.24 - 7.18 (m, 1H), 4.50 (m, 1H), 2.78 (m, 2H), 2.56 (m, 1H), 2.40 - 2.30 (m, 2H), 1.83 (s, 3H), 1.80 - 1.30 (m, 8H). MS (ESI <sup>+</sup> ) <i>m/z</i> (rel Intensity): 432.2 ([M - H <sub>2</sub> O + H] <sup>+</sup> , 100).                                                                                                                                                                                                                              |
| 187 | N-(6-phenylpicolinoyl)-Lys-boroMet       |   | <sup>1</sup> H NMR (D <sub>2</sub> O) δ 8.45 - 8.00 (m, 5H), 7.65 - 7.50 (m, 3H), 2.99 (dd, <i>J</i> = 7.5, 7.2 Hz, 2H), 2.78 (dd, <i>J</i> = 7.8, 6.8 Hz, 1H), 2.53 (dd, <i>J</i> = 7.3, 7.1 Hz, 2H), 2.02 (s, 3H), 2.00 - 1.50 (m, 8H). MS (ESI <sup>+</sup> ) <i>m/z</i> (rel Intensity): 441.3 ([M - H <sub>2</sub> O + H] <sup>+</sup> , 100).                                                                                                                                                                                                                      |
| 188 | N-(6-phenylpicolinoyl)-Trp-boroMet       |  | <sup>1</sup> H NMR (D <sub>2</sub> O-CD <sub>3</sub> CN, 4 : 1) δ 8.27 - 8.18 (m, 3H), 8.07 - 8.03 (m, 2H), 7.86 (d, <i>J</i> = 8.0 Hz, 1H), 7.77 - 7.72 (m, 4H), 7.67 (d, <i>J</i> = 8.5 Hz, 1H), 7.53 (s, 1H), 7.36 (t, <i>J</i> = 7.7 Hz, 1H), 7.21 (t, <i>J</i> = 7.7 Hz, 1H), 5.18 (m, 1H), 3.67 (d, <i>J</i> = 7.1 Hz, 1H), 3.01 (m, 1H), 2.52 - 2.38 (m, 2H), 2.06 (s, 3H), 1.57 - 1.40 (m, 4H). MS (ESI <sup>+</sup> ) <i>m/z</i> (rel Intensity): 499.1 ([M - H <sub>2</sub> O + H] <sup>+</sup> , 100), 539.1 ([M - H <sub>2</sub> O + Na] <sup>+</sup> , 20). |
| 189 | N-(8-isoquinolinoyl)-Lys-boroMet         |  | <sup>1</sup> H NMR (D <sub>2</sub> O) δ 9.83 (s, 1H), 8.55 (d, <i>J</i> = 6.6 Hz, 1H), 8.48 (d, <i>J</i> = 6.4 Hz, 1H), 8.38 (dd, <i>J</i> = 7.2, 6.0 Hz, 1H), 8.22 - 8.17 (m, 2H), 2.98 (dd, <i>J</i> = 7.5, 7.4 Hz, 2H), 2.84 (m, 1H), 2.55 (t, <i>J</i> = 7.3 Hz, 2H), 2.04 (s, 3H), 2.00 - 1.52 (m, 8H). MS (ESI <sup>+</sup> ) <i>m/z</i> (rel Intensity): 208.0 ([M - H <sub>2</sub> O]/2 + H] <sup>+</sup> , 100).                                                                                                                                                |

|            |                               |                                                                                     |                                                                                                                                                                                                                                                                                                                                                                                                                     |
|------------|-------------------------------|-------------------------------------------------------------------------------------|---------------------------------------------------------------------------------------------------------------------------------------------------------------------------------------------------------------------------------------------------------------------------------------------------------------------------------------------------------------------------------------------------------------------|
|            |                               |                                                                                     | 415.2 ([M - H <sub>2</sub> O + H] <sup>+</sup> , 50).                                                                                                                                                                                                                                                                                                                                                               |
| <b>190</b> | N-(benzoyl)-lys-boroMet       | 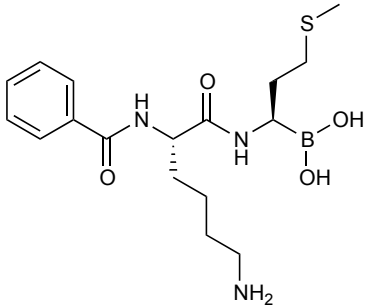   | <sup>1</sup> H NMR (D <sub>2</sub> O) δ 7.90 - 7.40 (m, 5H), 4.66 (dd, <i>J</i> = 8.7, 5.8 Hz, 1H), 2.98 (dd, <i>J</i> = 7.5, 7.3 Hz, 2H), 2.79 (m, 1H), 2.55 (dd, <i>J</i> = 7.3, 7.0 Hz, 2H), 2.06 (s, 3H), 2.00 - 1.50 (m, 8H). MS (ESI <sup>+</sup> ) <i>m/z</i> (rel Intensity): 364.2 ([M - H <sub>2</sub> O + H] <sup>+</sup> , 100).                                                                        |
| <b>191</b> | N-(isonicotinoyl)-Lys-boroMet |    | <sup>1</sup> H NMR (D <sub>2</sub> O) δ 8.97 (d, <i>J</i> = 6.5 Hz, 2H), 8.37 (d, <i>J</i> = 6.5 Hz, 2H), 4.72 (br, 1H), 3.0 (dd, <i>J</i> = 7.5, 7.3 Hz, 2H), 2.80 (m, 1H), 2.56 (t, <i>J</i> = 7.2 Hz, 2H), 2.08 (s, 3H), 2.00 - 1.50 (m, 8H). MS (ESI <sup>+</sup> ) <i>m/z</i> (rel Intensity): 183.1 ([M - H <sub>2</sub> O]/2 + H <sup>+</sup> ), 415.2 ([M - H <sub>2</sub> O + H] <sup>+</sup> , 90).       |
| <b>192</b> | N-(nicotinoyl)-Lys-boroMet    |   | <sup>1</sup> H NMR (D <sub>2</sub> O) δ 9.22 (s, 1H), 8.97 (d, <i>J</i> = 6.7 Hz, 2H), 8.21 (t, <i>J</i> = 6.7 Hz, 1H), 3.0 (dd, <i>J</i> = 7.5, 7.3 Hz, 2H), 2.80 (m, 1H), 2.56 (dd, <i>J</i> = 7.3, 7.1 Hz, 2H), 2.08 (s, 3H), 2.05 - 1.50 (m, 8H). MS (ESI <sup>+</sup> ) <i>m/z</i> (rel Intensity): 183.1 ([M - H <sub>2</sub> O]/2 + H <sup>+</sup> ), 415.2 ([M - H <sub>2</sub> O + H] <sup>+</sup> , 100). |
| <b>193</b> | N-(phenoxyacetyl)-Lys-boroMet |  | <sup>1</sup> H NMR (D <sub>2</sub> O) δ 7.25 - 7.08 (m, 2H), 6.85 - 6.70 (m, 3H), 4.48 (s, 2H), 4.29 (m, 1H), 2.60 (m, 2H), 2.41 (t, <i>J</i> = 6.6 Hz, 1H), 2.25 (t, <i>J</i> = 7.0 Hz, 2H), 1.80 (s, 3H), 1.70 - 1.00 (m, 6H). MS (ESI <sup>+</sup> ) <i>m/z</i> (rel Intensity): 394.2 ([M - H <sub>2</sub> O + H] <sup>+</sup> , 100).                                                                          |
| <b>194</b> | N-(phenylacetyl)-Lys-boroMet  |  | <sup>1</sup> H NMR (D <sub>2</sub> O) δ 7.20 - 7.07 (m, 5H), 4.21 (dd, <i>J</i> = 8.8, 5.6 Hz, 1H), 3.42 (s, 2H), 2.68 (t, <i>J</i> = 6.2 Hz, 2H), 2.42 (m, 1H), 2.22 (t, <i>J</i> = 7.4 Hz, 2H), 1.82 (s, 3H), 1.80 - 1.35 (m, 6H), 1.30 - 1.10 (m, 2H). MS (ESI <sup>+</sup> ) <i>m/z</i> (rel Intensity): 378.2 ([M - H <sub>2</sub> O + H] <sup>+</sup> , 100).                                                 |

|     |                                        |                                                                                      |                                                                                                                                                                                                                                                                                                                                                                                                                                                                                        |
|-----|----------------------------------------|--------------------------------------------------------------------------------------|----------------------------------------------------------------------------------------------------------------------------------------------------------------------------------------------------------------------------------------------------------------------------------------------------------------------------------------------------------------------------------------------------------------------------------------------------------------------------------------|
| 195 | N-(phenylmethane sulfonyl)-Lys-boroMet | 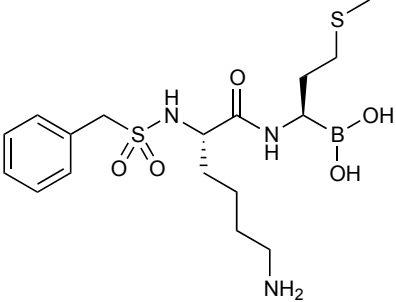    | <sup>1</sup> H NMR (D <sub>2</sub> O) δ 7.48 (s, 5H), 4.52 (s, 2H), 3.85 (m, 1H), 2.97 (t, <i>J</i> = 7.5 Hz, 2H), 2.79 (m, 1H), 2.56 (dd, <i>J</i> = 8.1, 7.0 Hz, 1H), 2.10 (s, 3H), 1.90 - 1.30 (m, 8H). MS (ESI <sup>+</sup> ) <i>m/z</i> (rel Intensity): 414.2 ([M - H <sub>2</sub> O + H] <sup>+</sup> , 100).                                                                                                                                                                   |
| 196 | N-(picolinoyl)-Ala-Lys-boroMet         |    | <sup>1</sup> H NMR (D <sub>2</sub> O) δ 8.66 (d, <i>J</i> = 4.2 Hz, 1H), 8.07 (m, 2H), 7.69 (d, <i>J</i> = 4.5 Hz, 1H), 4.51 (m, 1H), 3.0 (m, 2H), 2.80 (m, 1H), 2.55 (dd, <i>J</i> = 7.4, 6.3 Hz, 2H), 2.08 (s, 3H), 2.00 - 1.40 (m, 11H). MS (ESI <sup>+</sup> ) <i>m/z</i> (rel Intensity): 436.2 ([M - H <sub>2</sub> O + H] <sup>+</sup> , 100).                                                                                                                                  |
| 197 | N-(picolinoyl)-Lys-boroMet (O)         |    | <sup>1</sup> H NMR (D <sub>2</sub> O) δ 8.83 (d, <i>J</i> = 5.1 Hz, 1H), 8.58 (dd, <i>J</i> = 7.8, 5.1 Hz, 1H), 8.43 (d, <i>J</i> = 7.8 Hz, 1H), 8.10 (m, 1H), 4.67 (br, 1H), 3.45 (t, <i>J</i> = 6.1 Hz, 2H), 3.25 (s, 3H), 2.95 (t, <i>J</i> = 7.5 Hz, 2H), 2.74 (t, <i>J</i> = 7.4 Hz, 1H), 2.05 - 1.40 (m, 8H). MS (ESI <sup>+</sup> ) <i>m/z</i> (rel Intensity): 175.1 ([M - H <sub>2</sub> O]/2 + H] <sup>+</sup> , 100), 349.2 ([M - H <sub>2</sub> O + H] <sup>+</sup> , 95). |
| 198 | N-(picolinoyl)-Pro-Lys-boroMet         |  | <sup>1</sup> H NMR (D <sub>2</sub> O) δ 8.72 - 8.50 (m, 1H), 8.30 - 8.00 (m, 1H), 7.95 - 7.60 (m, 2H), 4.70 - 4.51 (m, 1H), 3.80 - 3.65 (m, 2H), 3.0 (t, <i>J</i> = 7.5 Hz, 2H), 2.80 (m, 1H), 2.55 - 2.40 (m, 3H), 2.10 - 1.40 (m, 11H). MS (ESI <sup>+</sup> ) <i>m/z</i> (rel Intensity): 462.2 ([M - H <sub>2</sub> O + H] <sup>+</sup> , 100).                                                                                                                                    |
| 199 | N-(picolinoyl)-Trp-Lys-boroMet         |  | <sup>1</sup> H NMR (D <sub>2</sub> O) δ 8.95 (s, 1H), 8.02 (m, 2H), 7.67 (m, 2H), 7.50 (d, <i>J</i> = 7.8 Hz, 1H), 7.35 (s, 1H), 7.24 (t, 1H, <i>J</i> = 7.0 Hz), 7.15 (m, 1H), 4.31 (m, 1H), 3.44 (d, <i>J</i> = 6.6 Hz, 2H), 2.86 (m, 2H), 2.65 (m, 1H), 2.52 (m, 2H), 2.08 (s, 3H), 2.00 - 1.30 (m, 8H). MS (ESI <sup>+</sup> ) <i>m/z</i> (rel Intensity): 551.2([M - H <sub>2</sub> O + H] <sup>+</sup> , 100).                                                                   |



|                   |                                                                  |                                                                                     |                                                                                                                                                                                                                                                                                                                                                                                                                                                                                                                                                                                                                                                                 |
|-------------------|------------------------------------------------------------------|-------------------------------------------------------------------------------------|-----------------------------------------------------------------------------------------------------------------------------------------------------------------------------------------------------------------------------------------------------------------------------------------------------------------------------------------------------------------------------------------------------------------------------------------------------------------------------------------------------------------------------------------------------------------------------------------------------------------------------------------------------------------|
| <p><b>200</b></p> | <p>N-(picolinoyl)-<br/>Trp-Lys-<br/>boroLeu</p>                  | 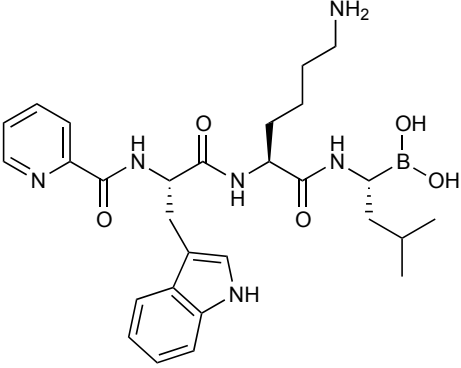  | <p><sup>1</sup>H NMR (D<sub>2</sub>O) δ 8.63 (d, <i>J</i> = 7.5 Hz, 1H), 8.04 - 8.00 (m, 2H), 7.68 - 7.62 (m, 2H), 7.50 (d, <i>J</i> = 8.1 Hz, 1H), 7.35 (s, 1H), 7.25 (dd, <i>J</i> = 8.1, 7.2 Hz, 1H), 7.15 (t, <i>J</i> = 7.3 Hz, 1H), 4.80 (m, 1H), 4.30 (dd, <i>J</i> = 8.4, 6.0 Hz, 1H), 3.44 (d, <i>J</i> = 6.6 Hz, 2H), 2.86 (t, <i>J</i> = 7.5 Hz, 2H), 2.68 (dd, <i>J</i> = 8.4, 7.2 Hz, 1H), 1.70 - 1.24 (m, 10H), 0.89 (d, <i>J</i> = 2.7 Hz, 3H), 0.87 (d, <i>J</i> = 2.7 Hz, 3H). MS (ESI<sup>+</sup>) <i>m/z</i> (rel intensity): 267.1 ([M - H<sub>2</sub>O + H]<sup>+</sup>, 100), 533.3 ([2 x (M - H<sub>2</sub>O) + H]<sup>+</sup>, 95).</p> |
| <p><b>201</b></p> | <p>N-(pyrazinoyl)-<br/>Lys-boroNva</p>                           |    | <p><sup>1</sup>H NMR (D<sub>2</sub>O) δ 9.20 (s, 1H), 8.82 (s, 1H), 8.75 (s, 1H), 4.70 (br, 1H), 2.97 (t, <i>J</i> = 7.5 Hz, 2H), 2.69 (t, <i>J</i> = 7.5 Hz, 1H), 2.05 - 1.90 (m, 3H), 1.72 (t, <i>J</i> = 7.5 Hz, 2H), 1.53 - 1.41 (m, 4H), 1.29 (dt, <i>J</i> = 7.2, 7.0 Hz, 2H), 0.86 (t, <i>J</i> = 7.2 Hz, 3H). MS (ESI<sup>+</sup>) <i>m/z</i> (rel Intensity): 334.3 ([M - H<sub>2</sub>O + H]<sup>+</sup>, 100).</p>                                                                                                                                                                                                                                   |
| <p><b>202</b></p> | <p>N-(R-2-<br/>hydroxy-2-<br/>phenyl)acetyl-<br/>Lys-boroMet</p> |  | <p><sup>1</sup>H NMR (D<sub>2</sub>O) δ 7.48 (s, 5H), 5.26 (s, 1H), 4.51 (dd, <i>J</i> = 8.4, 5.1 Hz, 1H), 2.93 (t, <i>J</i> = 7.5 Hz, 2H), 2.74 (t, <i>J</i> = 6.6 Hz, 1H), 2.48 (dd, <i>J</i> = 7.7, 7.3 Hz, 2H), 2.07 (s, 3H), 2.00 - 1.55 (m, 6H), 1.40 - 1.30 (m, 2H). MS (ESI<sup>+</sup>) <i>m/z</i> (rel Intensity): 394.2 ([M - H<sub>2</sub>O + H]<sup>+</sup>, 100).</p>                                                                                                                                                                                                                                                                             |
| <p><b>203</b></p> | <p>N(Et)Gly-<br/>boroSar</p>                                     |  | <p><sup>1</sup>H NMR (D<sub>2</sub>O) δ 4.26 (s, 2H), 3.20 (q, <i>J</i> = 7.3 Hz, 2H), 3.09 (s, 3H), 2.57 (s, 2H), 1.32 (t, <i>J</i> = 7.3 Hz, 3H). <sup>13</sup>C NMR (D<sub>2</sub>O) δ 170.41, 46.48, 46.22, 45.95, 38.10, 12.87. MS (ESI<sup>+</sup>) <i>m/z</i> (rel intensity): 157.1 ([M - H<sub>2</sub>O + H]<sup>+</sup>, 100).</p>                                                                                                                                                                                                                                                                                                                    |
| <p><b>204</b></p> | <p>N(Me)Ala-<br/>boroSar</p>                                     |  | <p><sup>1</sup>H NMR (D<sub>2</sub>O) δ 4.54 (q, 1H, <i>J</i> = 7.0 Hz, 1H), 3.19 (s, 3H), 2.74 (s, 3H), 2.56 (s, 2H), 1.57 (d, <i>J</i> = 7.0 Hz, 3H). <sup>13</sup>C NMR (D<sub>2</sub>O) δ 173.38, 54.87, 47.24, 38.63, 33.91, 16.45. MS (ESI<sup>+</sup>) <i>m/z</i> (rel intensity): 157.1 ([M - H<sub>2</sub>O + H]<sup>+</sup>, 100).</p>                                                                                                                                                                                                                                                                                                                |

|     |                   |                                                                                     |                                                                                                                                                                                                                                                                                                                                                                                                                                   |
|-----|-------------------|-------------------------------------------------------------------------------------|-----------------------------------------------------------------------------------------------------------------------------------------------------------------------------------------------------------------------------------------------------------------------------------------------------------------------------------------------------------------------------------------------------------------------------------|
| 205 | N(Me)Ala-Pro-CN   | 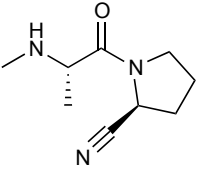   | <sup>1</sup> H NMR (D <sub>2</sub> O) δ 4.87 (dd, <i>J</i> = 6.3, 5.7 Hz, 1H), 4.23 (q, <i>J</i> = 6.9 Hz, 1H), 3.76 - 3.62 (m, 2H), 2.73 (s, 3H), 2.40 - 2.12 (m, 4H), 1.57 (d, <i>J</i> = 6.9 Hz, 3H). MS (ESI <sup>+</sup> ) <i>m/z</i> (rel Intensity): 182.1 ([M + H] <sup>+</sup> , 100).                                                                                                                                   |
| 206 | Nva-boroSar       |    | <sup>1</sup> H NMR (D <sub>2</sub> O) δ 4.58 (t, <i>J</i> = 6.7 Hz, 1H), 3.20 (s, 3H), 2.53 (s, 1H), 1.89 (dt, <i>J</i> = 7.0, 8.8 Hz, 2H), 1.46 - 1.35 (m, 2H), 0.94 (t, <i>J</i> = 7.3 Hz, 1H). <sup>13</sup> C NMR (D <sub>2</sub> O) δ 173.97, 50.49, 47.64, 38.70, 34.47, 20.01, 15.32. MS (ESI <sup>+</sup> ) <i>m/z</i> (rel intensity): 171.1 ([M - H <sub>2</sub> O + H] <sup>+</sup> , 100).                            |
| 207 | pGlu-Lys-boroMet  |   | <sup>1</sup> H NMR (D <sub>2</sub> O) δ 4.46 (t, <i>J</i> = 7.2 Hz, 1H), 4.37 (dd, <i>J</i> = 8.4, 4.7 Hz, 1H), 2.98 (t, <i>J</i> = 7.3 Hz, 2H), 2.77 (dd, <i>J</i> = 7.8, 6.9 Hz, 1H), 2.55 (t, <i>J</i> = 7.2 Hz, 1H), 2.42 (dd, <i>J</i> = 8.3, 6.9 Hz, 2H), 2.08 (s, 3H), 1.95 - 1.55 (m, 6H), 1.50 - 1.30 (m, 2H). MS (ESI <sup>+</sup> ) <i>m/z</i> (rel Intensity): 371.2 ([M - H <sub>2</sub> O + H] <sup>+</sup> , 100). |
| 208 | Phe-Ala-boroGln   |  | <sup>1</sup> H NMR (D <sub>2</sub> O) δ 7.45 - 7.31 (m, 5H), 4.56 (m, 1H), 4.29 (dd, <i>J</i> = 7.2, 6.7 Hz, 1H), 3.34 - 3.14 (m, 2H), 3.00 - 2.80 (m, 1H), 2.50 - 2.28 (m, 2H), 2.00 - 1.80 (m, 2H), 1.44 (d, <i>J</i> = 7.2 Hz, 3H), 1.37 - 1.33 (m, 1H). MS (ESI <sup>+</sup> ) <i>m/z</i> (rel Intensity): 347.3 ([M - H <sub>2</sub> O + H] <sup>+</sup> , 100).                                                             |
| 209 | Phe-Ala-S-boroPro |  | <sup>1</sup> H NMR (D <sub>2</sub> O) δ 7.45 - 7.21 (m, 5H), 4.95 (q, <i>J</i> = 6.7 Hz, 1H), 4.29 (t, <i>J</i> = 7.2 Hz, 1H), 3.99 - 3.95 (m, 1H), 3.71 - 3.66 (m, 1H), 3.50 - 3.43 (m, 1H), 3.34 - 3.09 (m, 2H), 2.21 - 2.15 (m, 3H), 1.90 - 1.85 (m, 1H), 1.39 (d, <i>J</i> = 6.7 Hz, 3H). MS (ESI <sup>+</sup> ) <i>m/z</i> (rel Intensity): 332.4 ([M - H <sub>2</sub> O + H] <sup>+</sup> , 100).                           |
| 210 | Phe-boroAla       |  | <sup>1</sup> H NMR (D <sub>2</sub> O) δ 7.52 - 7.35 (m, 5H), 4.27 (t, <i>J</i> = 7.6 Hz, 1H), 3.26 (d, <i>J</i> = 8.0 Hz, 2H), 2.90 (q, <i>J</i> = 7.5 Hz, 1H), 1.07 (d, <i>J</i> = 7.5 Hz, 3H). MS (ESI <sup>+</sup> ) <i>m/z</i> (rel intensity): 437.3 ([2 × (M - H <sub>2</sub> O) + H] <sup>+</sup> , 65), 219.2 ([M - H <sub>2</sub> O + H] <sup>+</sup> , 100).                                                            |

|     |             |                                                                                     |                                                                                                                                                                                                                                                                                                                                                                                                                                                                         |
|-----|-------------|-------------------------------------------------------------------------------------|-------------------------------------------------------------------------------------------------------------------------------------------------------------------------------------------------------------------------------------------------------------------------------------------------------------------------------------------------------------------------------------------------------------------------------------------------------------------------|
| 211 | Phe-boroGly | 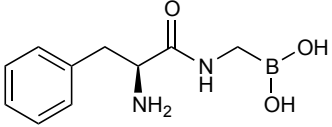   | <sup>1</sup> H NMR (D <sub>2</sub> O) δ 7.45 - 7.28 (m, 5H), 4.20 (t, <i>J</i> = 7.4 Hz, 1H), 3.20 (d, <i>J</i> = 7.4 Hz, 2H), 2.74 (d, <i>J</i> = 16.9 Hz, 1H), 2.55 (d, <i>J</i> = 16.9 Hz, 1H). MS (ESI <sup>+</sup> ) <i>m/z</i> (rel Intensity): 205.2 ([M - H <sub>2</sub> O + H] <sup>+</sup> , 100), 409.2 ([2 x (M - H <sub>2</sub> O) + H] <sup>+</sup> , 60).                                                                                                |
| 212 | Phe-boroLeu |    | 35                                                                                                                                                                                                                                                                                                                                                                                                                                                                      |
| 213 | Phe-boroNva |    | <sup>1</sup> H NMR (D <sub>2</sub> O): δ 7.50 - 7.35 (m, 3H), 7.35 - 7.20 (m, 2H), 4.21 (dd, <i>J</i> = 8.4, 6.8 Hz, 1H), 3.26 - 3.11 (m, 2H), 2.72 (dd, <i>J</i> = 8.5, 6.2 Hz, 1H), 1.38 - 1.24 (m, 2H), 1.09-1.01 (m, 2H), 0.80 (t, <i>J</i> = 7.2 Hz, 3H). MS (ESI <sup>+</sup> ) <i>m/z</i> (rel intensity): 493.3 ([2 x (M - H <sub>2</sub> O) + H] <sup>+</sup> , 93), 287.1 ([M + Na] <sup>+</sup> , 4), 247.1 ([M - H <sub>2</sub> O + H] <sup>+</sup> , 100). |
| 214 | Phe-boroPhe |   | <sup>1</sup> H NMR (D <sub>2</sub> O) δ 7.45 - 7.25 (m, 8H), 7.15 - 7.05 (m, 2H), 4.19 (t, <i>J</i> = 7.7 Hz, 1H), 3.22 - 3.05 (m, 3H), 2.87 (dd, <i>J</i> = 13.9, 5.8 Hz, 1H), 2.59 (dd, <i>J</i> = 13.9, 10.2 Hz, 1H). MS (ESI <sup>+</sup> ) <i>m/z</i> (rel Intensity): 295.1 ([M - H <sub>2</sub> O + H] <sup>+</sup> , 100), 589.3 ([2 x (M - H <sub>2</sub> O) + H] <sup>+</sup> , 30).                                                                          |
| 215 | Phe-boroPro |  | 34                                                                                                                                                                                                                                                                                                                                                                                                                                                                      |
| 216 | Phe-boroSar |  | <sup>1</sup> H NMR (D <sub>2</sub> O) δ 7.42 - 7.30 (m, 5H), 4.77 (br, 1H), 3.35 - 3.17 (m, 2H), 2.65 (s, 3H), 2.42 (s, 2H). <sup>13</sup> C NMR (D <sub>2</sub> O) δ 172.77, 135.31, 132.13, 131.92, 130.99, 51.68, 47.46, 39.91, 38.24. MS (ESI <sup>+</sup> ) <i>m/z</i> (rel Intensity): 219.1 ([M - H <sub>2</sub> O + H] <sup>+</sup> , 100).                                                                                                                     |
| 217 | Phe-Pro-CN  |  | See <b>Supplementary Note 2</b>                                                                                                                                                                                                                                                                                                                                                                                                                                         |

|     |             |                                                                                     |                                                                                                                                                                                                                                                                                                                                                                                                                                                                  |
|-----|-------------|-------------------------------------------------------------------------------------|------------------------------------------------------------------------------------------------------------------------------------------------------------------------------------------------------------------------------------------------------------------------------------------------------------------------------------------------------------------------------------------------------------------------------------------------------------------|
| 218 | PHX1149     | 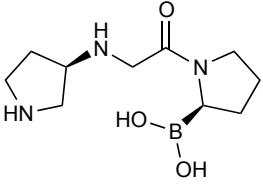   | <sup>1</sup> H NMR (D <sub>2</sub> O) δ 4.21 (t, <i>J</i> = 7.5 Hz, 1H), 4.13 (s, 2H), 3.85 (dd, <i>J</i> = 14.5, 8.1 Hz, 1H), 3.64 - 3.40 (m, 5H), 3.10 (t, <i>J</i> = 8.1 Hz, 1H), 2.65 - 2.59 (m, 1H), 2.33 - 2.26 (m, 1H), 2.13 - 1.90 (m, 3H), 1.80 - 1.75 (m, 1H). MS (ESI <sup>+</sup> ) <i>m/z</i> (rel Intensity): 224.5 ([M - H <sub>2</sub> O + H] <sup>+</sup> , 70), 242.5 ([M + H] <sup>+</sup> , 100).                                            |
| 219 | Pro-boroAla |    | <sup>1</sup> H NMR (D <sub>2</sub> O) δ 4.41 (t, <i>J</i> = 7.1 Hz, 1H), 3.55 - 3.40 (m, 2H), 3.04 (q, <i>J</i> = 7.5 Hz, 1H), 2.54 - 2.41 (m, 1H), 2.24 - 2.07 (m, 3H), 1.23 (d, <i>J</i> = 7.5 Hz, 3H). MS (ESI <sup>+</sup> ) <i>m/z</i> (rel intensity): 337.2 ([2 × (M - H <sub>2</sub> O) + H] <sup>+</sup> , 100), 169.2 ([M - H <sub>2</sub> O + H] <sup>+</sup> , 43).                                                                                  |
| 220 | Pro-boroGly |    | <sup>1</sup> H NMR (D <sub>2</sub> O) δ 4.36 (dd, <i>J</i> = 7.6, 7.14 Hz, 1H), 3.50 - 3.30 (m, 2H), 2.47 (d, <i>J</i> = 16.9 Hz, 1H), 2.40 (d, <i>J</i> = 16.9 Hz, 1H), 2.82 - 2.37 (m, 3H), 2.11 - 1.83 (m, 2H). MS (ESI <sup>+</sup> ) <i>m/z</i> (rel Intensity): 155.1 ([M - H <sub>2</sub> O + H] <sup>+</sup> , 100), 173.2 ([M + H] <sup>+</sup> , 75).                                                                                                  |
| 221 | Pro-boroLeu |  | <sup>1</sup> H NMR (D <sub>2</sub> O) δ 4.28 (dd, <i>J</i> = 7.8, 6.9 Hz, 1H), 3.38 - 3.28 (m, 2H), 2.90 (dd, <i>J</i> = 9.0, 6.6 Hz, 1H), 2.35 (m, 1H), 2.03 - 1.90 (m, 3H), 1.53 - 1.25 (m, 3H), 0.85 - 0.79 (m, 7H). MS (ESI <sup>+</sup> ) <i>m/z</i> (rel intensity): 211.0 ([M - H <sub>2</sub> O + H] <sup>+</sup> , 80), 421.2 ([2 × (M - H <sub>2</sub> O) + H] <sup>+</sup> , 100).                                                                    |
| 222 | Pro-boroNva |  | <sup>1</sup> H NMR (D <sub>2</sub> O): δ 4.35 (t, <i>J</i> = 7.7 Hz, 1H), 3.43 - 3.35 (m, 2H), 2.91 (t, <i>J</i> = 7.5 Hz, 1H), 2.43 - 2.04 (m, 4H), 1.57 - 1.49 (m, 2H), 1.37 - 1.26 (m, 2H), 0.88 (t, <i>J</i> = 7.2 Hz, 3H). MS (ESI <sup>+</sup> ) <i>m/z</i> (rel intensity): 589.5 ([3 × (M - H <sub>2</sub> O) + H] <sup>+</sup> , 3), 393.3 ([2 × (M - H <sub>2</sub> O) + H] <sup>+</sup> , 56), 197.2 ([M - H <sub>2</sub> O + H] <sup>+</sup> , 100). |
| 223 | Pro-boroPhe |  | <sup>1</sup> H NMR (D <sub>2</sub> O) δ 7.45 - 7.25 (m, 5H), 4.28 (dd, <i>J</i> = 8.1, 7.2 Hz, 1H), 3.45 - 3.36 (m, 2H), 3.23 (dd, <i>J</i> = 10.1, 6.2 Hz, 1H), 2.97 (dd, <i>J</i> = 14.0, 6.1 Hz, 1H), 2.85 (dd, <i>J</i> = 14.0, 10.1 Hz, 1H), 2.36 - 2.20 (m, 1H), 2.06 - 1.90 (m, 1H).                                                                                                                                                                      |

|     |                     |                                                                                     |                                                                                                                                                                                                                                                                                                                                                                                                                                                                                                                        |
|-----|---------------------|-------------------------------------------------------------------------------------|------------------------------------------------------------------------------------------------------------------------------------------------------------------------------------------------------------------------------------------------------------------------------------------------------------------------------------------------------------------------------------------------------------------------------------------------------------------------------------------------------------------------|
|     |                     |                                                                                     | 3H). MS (ESI <sup>+</sup> ) <i>m/z</i> (rel Intensity): 245.1 ([M - H <sub>2</sub> O + H] <sup>+</sup> , 100), 263.1 ([M + H] <sup>+</sup> , 40).                                                                                                                                                                                                                                                                                                                                                                      |
| 224 | Pro-boroPro         | 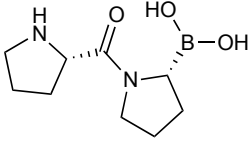   | 34                                                                                                                                                                                                                                                                                                                                                                                                                                                                                                                     |
| 225 | Pro-boroSar         |    | <sup>1</sup> H NMR (D <sub>2</sub> O) δ 4.85 (br, 1H), 3.51 - 3.40 (m, 2H), 3.16 (s, 3H), 2.58 (s, 2H), 2.57 - 2.04 (m, 4H). <sup>13</sup> C NMR (D <sub>2</sub> O) δ 173.06, 58.48, 49.23, 46.49, 38.68, 31.06, 26.20. MS (ESI <sup>+</sup> ) <i>m/z</i> (rel intensity): 169.2 ([M - H <sub>2</sub> O + H] <sup>+</sup> , 100).                                                                                                                                                                                      |
| 226 | Py(D)AlaboroPro     |    | 42                                                                                                                                                                                                                                                                                                                                                                                                                                                                                                                     |
| 227 | pyro-Glu-boroPro    |   | <sup>1</sup> H NMR (D <sub>2</sub> O) δ 4.63 (dd, <i>J</i> = 8.4, 5.6 Hz, 1H), 4.39 (dd, <i>J</i> = 8.3, 5.0 Hz, 1H), 3.70 (dd, <i>J</i> = 9.2, 8.2 Hz, 1H), 3.46 - 3.38 (m, 2H), 2.97 (dd, <i>J</i> = 10.7, 6.7 Hz, 1H), 2.52 - 2.45 (m, 1H), 2.42 - 2.36 (m, 3H), 2.04 - 1.83 (m, 6H), 1.67 - 1.60 (m, 1H). MS (ESI <sup>+</sup> ) <i>m/z</i> (rel Intensity): 209.1 ([M - H <sub>2</sub> O + H] <sup>+</sup> , 90), 227.1 ([M + H] <sup>+</sup> , 25), 417.2 ([2 x (M - H <sub>2</sub> O) + H] <sup>+</sup> , 100). |
| 228 | PyroGlu-boroSar     |  | <sup>1</sup> H NMR (D <sub>2</sub> O) δ 4.18 (dd, <i>J</i> = 8.6, 4.4 Hz, 1H), 3.12 (s, 3H), 2.60 - 2.37 (m, 5H), 2.12 - 2.06 (m, 1H). MS (ESI <sup>+</sup> ) <i>m/z</i> (rel Intensity): 182.2 ([M - H <sub>2</sub> O + H] <sup>+</sup> , 100).                                                                                                                                                                                                                                                                       |
| 229 | PyroGlu-Lys-boroLeu |  | <sup>1</sup> H NMR (D <sub>2</sub> O) δ 4.44 (t, <i>J</i> = 7.2 Hz, 1H), 4.38 (dd, <i>J</i> = 4.8, 8.9 Hz, 1H), 2.99 (t, <i>J</i> = 7.5 Hz, 2H), 2.77 (dd, <i>J</i> = 9.0, 6.6 Hz, 1H), 2.57 - 2.50 (m, 1H), 2.43 (dd, <i>J</i> = 8.1, 7.3 Hz, 2H), 2.10 - 1.99 (m, 1H), 1.87 - 1.29 (m, 10H), 0.90 (d, <i>J</i> = 4.0 Hz, 3H), 0.88 (d, 3H, <i>J</i> = 4.0 Hz). MS (ESI <sup>+</sup> ) <i>m/z</i> (rel intensity): 353.2 ([M - H <sub>2</sub> O + H] <sup>+</sup> , 100).                                             |

|     |                |                                                                                     |                                                                                                                                                                                                                                                                                                                                                                                                                                         |
|-----|----------------|-------------------------------------------------------------------------------------|-----------------------------------------------------------------------------------------------------------------------------------------------------------------------------------------------------------------------------------------------------------------------------------------------------------------------------------------------------------------------------------------------------------------------------------------|
| 230 | PyroGlu-Pro-CN | 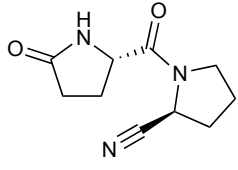   | <sup>1</sup> H NMR (D <sub>2</sub> O) δ 4.83 (br, 1H), 4.67 (dd, <i>J</i> = 8.9, 7.7 Hz, 1H), 3.76 - 3.61 (m, 2H), 2.67 - 2.64 (m, 1H), 2.52 - 2.45 (m, 2H), 2.38 - 2.30 (m, 2H), 2.24 - 2.11 (m, 3H). MS (ESI <sup>+</sup> ) <i>m/z</i> (rel Intensity): 208.0 ([M + H] <sup>+</sup> , 75), 415.0 ([2M + H] <sup>+</sup> , 100).                                                                                                       |
| 231 | R-Gly-Pro-CN   |   | 46                                                                                                                                                                                                                                                                                                                                                                                                                                      |
| 232 | Sar-boroAla    |    | <sup>1</sup> H NMR (D <sub>2</sub> O) δ 3.88 (s, 2H), 3.00 (q, <i>J</i> = 7.5 Hz, 1H), 2.76 (s, 3H), 1.18 (d, <i>J</i> = 7.5 Hz, 3H). MS (ESI <sup>+</sup> ) <i>m/z</i> (rel intensity): 285.1 ([2 × (M - H <sub>2</sub> O) + H] <sup>+</sup> , 100), 143.1 ([M - H <sub>2</sub> O + H] <sup>+</sup> , 16).                                                                                                                             |
| 233 | Sar-boroGly    |   | <sup>1</sup> H NMR (D <sub>2</sub> O) δ 3.87 (s, 2H), 2.38 (s, 2H), 2.76 (s, 3H). MS (ESI <sup>+</sup> ) <i>m/z</i> (rel Intensity): 129.1 ([M - H <sub>2</sub> O + H] <sup>+</sup> , 100), 147.1 ([M + H] <sup>+</sup> , 90).                                                                                                                                                                                                          |
| 234 | Sar-boroLeu    |  | 35                                                                                                                                                                                                                                                                                                                                                                                                                                      |
| 235 | Sar-boroNva    |  | <sup>1</sup> H NMR (D <sub>2</sub> O) δ 4.01 (t, <i>J</i> = 6.4 Hz, 1H), 3.90 (s, 2H), 3.01 (t, <i>J</i> = 7.3 Hz, 1H), 2.77 (s, 3H), 1.62 (br, 1H), 1.53 (m, 1H), 1.40 - 1.29 (m, 2H), 0.90 (dd, <i>J</i> = 4.8, 4.6 Hz, 3H). MS (ESI <sup>+</sup> ) <i>m/z</i> (rel Intensity): 171.0 ([M - H <sub>2</sub> O + H] <sup>+</sup> , 90), 189.0 ([M + H] <sup>+</sup> , 50), 341.3 ([2 × (M - H <sub>2</sub> O) + H] <sup>+</sup> , 100). |
| 236 | Sar-boroPhe    |  | <sup>1</sup> H NMR (D <sub>2</sub> O) δ 7.45 - 7.25 (m, 5H), 3.82 (dd, <i>J</i> = 15.8, 7.2 Hz, 1H), 3.41 (dd, <i>J</i> = 9.9, 7.0 Hz, 1H), 2.96 (dd, <i>J</i> = 13.8, 7.0 Hz, 1H), 2.84 (dd, <i>J</i> = 13.8, 9.9 Hz, 1H), 2.57 (s, 3H). MS (ESI <sup>+</sup> ) <i>m/z</i> (rel Intensity): 219.1 ([M - H <sub>2</sub> O + H] <sup>+</sup> , 100), 237.1 ([M + H] <sup>+</sup> , 30).                                                  |

|     |             |                                                                                     |                                                                                                                                                                                                                                                                                                                                                                                                                                                                        |
|-----|-------------|-------------------------------------------------------------------------------------|------------------------------------------------------------------------------------------------------------------------------------------------------------------------------------------------------------------------------------------------------------------------------------------------------------------------------------------------------------------------------------------------------------------------------------------------------------------------|
| 237 | Sar-boroPro | 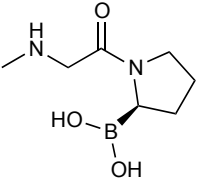   | $^1\text{H NMR (D}_2\text{O)}$ $\delta$ 4.00 (s, 2H), 3.45 - 3.35 (m, 1H), 3.12 - 3.05 (m, 1H), 2.78 (s, 2H), 2.14 - 1.94 (m, 3H), 1.76 - 1.70 (m, 1H). MS (ESI <sup>+</sup> ) $m/z$ (rel Intensity): 169.1 ([M - H <sub>2</sub> O + H] <sup>+</sup> , 100).                                                                                                                                                                                                           |
| 238 | Sar-boroSar |    | $^1\text{H NMR (D}_2\text{O)}$ $\delta$ 4.25 (s, 2H), 3.08 (s, 3H), 2.81 (s, 3H), 2.56 (s, 2H). $^{13}\text{C NMR (D}_2\text{O)}$ $\delta$ 170.23, 48.52, 46.17, 38.19, 35.72. MS (ESI <sup>+</sup> ) $m/z$ (rel intensity): 143.1 ([M - H <sub>2</sub> O + H] <sup>+</sup> , 100).                                                                                                                                                                                    |
| 239 | Sar-Pro-CN  |    | $^1\text{H NMR (D}_2\text{O)}$ $\delta$ 4.83 (dd, $J = 6.7, 4.8$ Hz, 1H), 4.08 (s, 2H), 3.70 - 3.62 (m, 1H), 3.54 - 3.45 (m, m, 1H), 2.82 (s, 3H), 2.37 - 2.13 (m, 4H). MS (ESI <sup>+</sup> ) $m/z$ (rel Intensity): 168.1 ([M + H] <sup>+</sup> , 100), 335.2 ([2M + H] <sup>+</sup> , 25).                                                                                                                                                                          |
| 240 | Ser-boroAla |    | $^1\text{H NMR (D}_2\text{O)}$ $\delta$ 4.00 - 3.95 (m, 1H), 3.85 - 3.70 (m, 2H), 2.85 - 2.75 (m, 1H), 1.05 - 0.95 (m, 3H). MS (ESI <sup>+</sup> ) $m/z$ (rel intensity): 317.2 ([2 x (M - H <sub>2</sub> O) + H] <sup>+</sup> , 100), 159.2 ([M - H <sub>2</sub> O + H] <sup>+</sup> , 39).                                                                                                                                                                           |
| 241 | Ser-boroGly |  | $^1\text{H NMR (D}_2\text{O)}$ $\delta$ 4.14 (dd, $J = 5.0, 4.8$ Hz, 1H), 3.90 - 4.03 (m, 2H), 2.83 (d, $J = 16.9$ Hz, 1H), 2.76 (d, $J = 16.9$ Hz, 1H). MS (ESI <sup>+</sup> ) $m/z$ (rel Intensity): 145.1 ([M - H <sub>2</sub> O + H] <sup>+</sup> , 100), 289.2 ([2 x (M - H <sub>2</sub> O) + H] <sup>+</sup> , 50).                                                                                                                                              |
| 242 | Ser-boroLeu |  | 35                                                                                                                                                                                                                                                                                                                                                                                                                                                                     |
| 243 | Ser-boroNva |  | $^1\text{H NMR (D}_2\text{O)}$ : $\delta$ 4.14 (dd, $J = 5.9, 4.4$ Hz, 1H), 3.96 (ddd, $J = 22.5, 12.3, 4.4$ Hz, 2H), 2.95 (t, $J = 7.4$ Hz, 1H), 1.59 - 1.51 (m, 2H), 1.41 - 1.27 (m, 2H), 0.90 (t, $J = 7.3$ Hz, 3H). MS (ESI <sup>+</sup> ) $m/z$ (rel intensity): 541.3 ([3 x (M - H <sub>2</sub> O) - H <sub>2</sub> O + H] <sup>+</sup> , 4), 373.2 ([2 x (M - H <sub>2</sub> O) + H] <sup>+</sup> , 100), 187.3 ([M - H <sub>2</sub> O + H] <sup>+</sup> , 30). |

|     |                         |                                                                                      |                                                                                                                                                                                                                                                                                                                                                                                                                                                                 |
|-----|-------------------------|--------------------------------------------------------------------------------------|-----------------------------------------------------------------------------------------------------------------------------------------------------------------------------------------------------------------------------------------------------------------------------------------------------------------------------------------------------------------------------------------------------------------------------------------------------------------|
| 244 | Ser-boroPhe             | 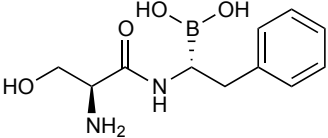    | See <b>Supplementary Note 2</b>                                                                                                                                                                                                                                                                                                                                                                                                                                 |
| 245 | Ser-boroPro             |     | <sup>1</sup> H NMR (D <sub>2</sub> O) δ 4.34 (dd, <i>J</i> = 6.7, 4.8 Hz, 1H), 4.0 (dd, <i>J</i> = 12.5, 4.1 Hz, 1H), 3.82 (dd, <i>J</i> = 12.5, 7.0 Hz, 1H), 3.67 - 3.60 (m, 1H), 3.49 - 3.42 (m, 1H), 3.05 (dd, <i>J</i> = 11.2, 6.9 Hz, 1H), 2.10 - 1.89 (m, 3H), 1.72 - 1.62 (m, 1H). MS (ESI <sup>+</sup> ) <i>m/z</i> (rel Intensity): 185.1 ([M - H <sub>2</sub> O + H] <sup>+</sup> , 100), 369.2 ([2 x (M - H <sub>2</sub> O) + H] <sup>+</sup> , 60). |
| 246 | Ser-boroSar             |     | <sup>1</sup> H NMR (D <sub>2</sub> O) δ 4.71 (dd, <i>J</i> = 5.6, 5.0 Hz, 1H), 4.0 (m, 2H), 3.22 (s, 3H), 2.51 (s, 2H). <sup>13</sup> C NMR (D <sub>2</sub> O) δ 171.90, 61.46, 52.65, 47.35, 38.81. MS (ESI <sup>+</sup> ) <i>m/z</i> (rel intensity): 159.0 ([M - H <sub>2</sub> O + H] <sup>+</sup> , 100).                                                                                                                                                  |
| 247 | Ser-Pro-CN              |    | <sup>1</sup> H NMR (D <sub>2</sub> O) δ 4.87 (dd, <i>J</i> = 7.5, 5.3 Hz, 1H), 4.45 (dd, <i>J</i> = 5.3, 4.5 Hz, 1H), 4.10 - 3.97 (m, 2H), 3.79 - 3.69 (m, 2H), 2.43 - 2.12 (m, 4H). MS (ESI <sup>+</sup> ) <i>m/z</i> (rel Intensity): 184.1 ([M + H] <sup>+</sup> , 100), 367.2 ([2M + H] <sup>+</sup> , 30).                                                                                                                                                 |
| 248 | Ser-Val-Phe-Ala-boroGln |  | <sup>1</sup> H NMR (D <sub>2</sub> O) δ 7.41 - 7.27 (m, 5H), 4.77 (m, 1H), 4.64 (m, 1H), 4.50 (m, 1H), 4.17 (dd, <i>J</i> = 6.9, 6.6 Hz, 2H), 3.92 - 3.88 (m, 2H), 3.13 - 3.03 (m, 2H), 2.33 (m, 1H), 2.03 - 2.00 (m, 1H), 1.85 (m, 2H), 1.41 (d, <i>J</i> = 6.9 Hz, 3H), 0.87 (d, <i>J</i> = 6.5 Hz, 6H). LCMS (ESI <sup>+</sup> ) <i>m/z</i> (rel Intensity): 533.1 ([M + H] <sup>+</sup> , 100).                                                             |
| 249 | Suc-Lys-boroMet         |   | <sup>1</sup> H NMR (D <sub>2</sub> O) δ 4.48 (dd, <i>J</i> = 9.1, 5.3 Hz, 1H), 2.99 (t, <i>J</i> = 7.5 Hz, 2H), 2.73 (t, <i>J</i> = 6.6 Hz, 1H), 2.68 - 2.50 (m, 6H), 2.12 (s, 3H), 1.95 - 1.35 (m, 8H). MS (ESI <sup>+</sup> ) <i>m/z</i> (rel Intensity): 360.1 ([M - H <sub>2</sub> O + H] <sup>+</sup> , 100).                                                                                                                                              |



|     |             |                                                                                     |                                                                                                                                                                                                                                                                                                                                                                                                                                        |
|-----|-------------|-------------------------------------------------------------------------------------|----------------------------------------------------------------------------------------------------------------------------------------------------------------------------------------------------------------------------------------------------------------------------------------------------------------------------------------------------------------------------------------------------------------------------------------|
| 250 | Thr-boroAla | 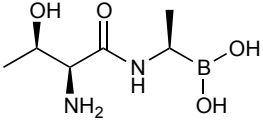   | $^1\text{H NMR (D}_2\text{O)}$ $\delta$ 4.11 - 4.17 (m, 1H), 3.84 (d, $J = 6.5$ Hz, 1H), 2.97 (q, $J = 7.4$ Hz, 1H), 1.30 (d, $J = 6.5$ Hz, 3H), 1.18 (d, $J = 7.4$ Hz, 3H). MS (ESI $^+$ ) $m/z$ (rel intensity): 345.2 ( $[2 \times (\text{M} - \text{H}_2\text{O}) + \text{H}]^+$ , 100), 173.5 ( $[\text{M} - \text{H}_2\text{O} + \text{H}]^+$ , 5).                                                                              |
| 251 | Thr-boroGly |    | $^1\text{H NMR (D}_2\text{O)}$ $\delta$ 4.14 (q, $J = 6.4$ Hz, 1H), 3.83 (d, $J = 6.4$ Hz, 1H), 2.83 (d, $J = 16.9$ Hz, 1H), 2.76 (d, $J = 16.9$ Hz, 1H), 1.28 (d, $J = 6.4$ Hz, 1H). MS (ESI $^+$ ) $m/z$ (rel Intensity): 159.1 ( $[\text{M} - \text{H}_2\text{O} + \text{H}]^+$ , 100), 317.2 ( $[2 \times (\text{M} - \text{H}_2\text{O}) + \text{H}]^+$ , 75).                                                                    |
| 252 | Thr-boroLeu |    | 35                                                                                                                                                                                                                                                                                                                                                                                                                                     |
| 253 | Thr-boroPhe |   | $^1\text{H NMR (D}_2\text{O)}$ $\delta$ 7.45 - 7.25 (m, 5H), 4.11 (q, $J = 6.4$ Hz, 1H), 3.80 (d, $J = 6.2$ Hz, 1H), 3.26 (dd, $J = 9.8, 6.3$ Hz, 1H), 2.98 (dd, $J = 13.8, 6.3$ Hz, 1H), 2.86 (dd, $J = 13.8, 9.8$ Hz, 1H), 1.26 (d, $J = 6.4$ Hz, 3H). MS (ESI $^+$ ) $m/z$ (rel Intensity): 249.1 ( $[\text{M} - \text{H}_2\text{O} + \text{H}]^+$ , 100), 497.2 ( $[2 \times (\text{M} - \text{H}_2\text{O}) + \text{H}]^+$ , 50). |
| 254 | Thr-boroPro |  | 34                                                                                                                                                                                                                                                                                                                                                                                                                                     |
| 255 | Thr-boroSar |  | $^1\text{H NMR (D}_2\text{O)}$ $\delta$ 4.53 (d, $J = 5.8$ Hz, 1H), 4.26 (dt, $J = 5.8, 6.5$ Hz, 1H), 3.26 (s, 3H), 2.57 (d, $J = 5.2$ Hz, 2H), 1.32 (d, $J = 6.5$ Hz, 3H). $^{13}\text{C NMR (D}_2\text{O)}$ $\delta$ 172.01, 68.42, 55.64, 47.66, 39.20, 20.92. MS (ESI $^+$ ) $m/z$ (rel intensity): 173.1 ( $[\text{M} - \text{H}_2\text{O} + \text{H}]^+$ , 100).                                                                 |
| 256 | Thr-Pro-CN  |  | $^1\text{H NMR (D}_2\text{O)}$ $\delta$ 4.87 (dd, $J = 7.5, 5.4$ Hz, 1H), 4.39 - 4.27 (m, 2H), 3.85 - 3.69 (m, 2H), 2.44 - 2.10 (m, 4H), 1.35 (d, $J = 6.0$ Hz, 3H). MS (ESI $^+$ ) $m/z$ (rel Intensity): 198.1 ( $[\text{M} + \text{H}]^+$ , 100).                                                                                                                                                                                   |

|     |             |                                                                                     |                                                                                                                                                                                                                                                                                                                                                                                  |
|-----|-------------|-------------------------------------------------------------------------------------|----------------------------------------------------------------------------------------------------------------------------------------------------------------------------------------------------------------------------------------------------------------------------------------------------------------------------------------------------------------------------------|
| 257 | Tle-boroAla | 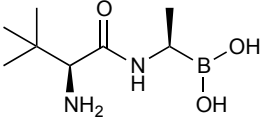   | $^1\text{H NMR (D}_2\text{O)}$ $\delta$ 3.81 (s, 1H), 2.96 (q, $J = 7.5$ Hz, 1H), 1.23 (d, $J = 7.5$ Hz, 3H), 1.15 (s, 9H). MS (ESI $^+$ ) $m/z$ (rel intensity): 369.2 ( $[2 \times (\text{M} - \text{H}_2\text{O}) + \text{H}]^+$ , 100), 185.2 ( $[\text{M} - \text{H}_2\text{O} + \text{H}]^+$ , 69).                                                                        |
| 258 | Tle-boroGly |    | $^1\text{H NMR (D}_2\text{O)}$ $\delta$ 3.70 (s, 1H), 2.77 (d, $J = 16.7$ Hz, 1H), 2.67 (d, $J = 16.7$ Hz, 1H), 1.05 (s, 9H). MS (ESI $^+$ ) $m/z$ (rel Intensity): 171.2 ( $[\text{M} - \text{H}_2\text{O} + \text{H}]^+$ , 100), 313.2 ( $[2 \times (\text{M} - \text{H}_2\text{O}) + \text{H}]^+$ , 50).                                                                      |
| 259 | Tle-boroLeu |    | 35                                                                                                                                                                                                                                                                                                                                                                               |
| 260 | Tle-boroNva |    | $^1\text{H NMR (D}_2\text{O)}$ : $\delta$ 3.75 (s, 1H), 2.79 (t, $J = 7.6$ Hz, 1H), 1.54 - 1.47 (m, 2H), 1.39 - 1.28 (m, 2H), 1.07 (s, 9H), 0.89 (t, $J = 7.2$ Hz, 3H). MS (ESI $^+$ ) $m/z$ (rel intensity): 425.3 ( $[2 \times (\text{M} - \text{H}_2\text{O}) + \text{H}]^+$ , 100), 213.2 ( $[\text{M} - \text{H}_2\text{O} + \text{H}]^+$ , 46).                            |
| 261 | Tle-boroPhe |  | $^1\text{H NMR (D}_2\text{O)}$ $\delta$ 7.45 - 7.25 (m, 5H), 3.70 (s, 1H), 3.15 (dd, $J = 10.6, 6.0$ Hz, 1H), 2.97 (dd, $J = 14.1, 6.0$ Hz, 1H), 2.78 (dd, $J = 14.1, 10.6$ Hz, 1H), 1.05 (s, 9H). MS (ESI $^+$ ) $m/z$ (rel Intensity): 261.1 ( $[\text{M} - \text{H}_2\text{O} + \text{H}]^+$ , 100), 521.3 ( $[2 \times (\text{M} - \text{H}_2\text{O}) + \text{H}]^+$ , 50). |
| 262 | Tle-boroPro |  | 34                                                                                                                                                                                                                                                                                                                                                                               |
| 263 | Tle-boroSar |  | $^1\text{H NMR (D}_2\text{O)}$ $\delta$ 4.39 (s, 1H), 3.24 (s, 3H), 2.46 (d, $J = 14.9$ Hz, 2H), 1.09 (s, 9H). $^{13}\text{C NMR (D}_2\text{O)}$ $\delta$ 172.91, 57.65, 48.09, 39.87, 37.60, 27.96. MS (ESI $^+$ ) $m/z$ (rel intensity): 185.2 ( $[\text{M} - \text{H}_2\text{O} + \text{H}]^+$ , 100).                                                                        |

|     |             |                                                                                     |                                                                                                                                                                                                                                                                                                                                                                                                                                                                                                                |
|-----|-------------|-------------------------------------------------------------------------------------|----------------------------------------------------------------------------------------------------------------------------------------------------------------------------------------------------------------------------------------------------------------------------------------------------------------------------------------------------------------------------------------------------------------------------------------------------------------------------------------------------------------|
| 264 | Tle-Pro-CN  | 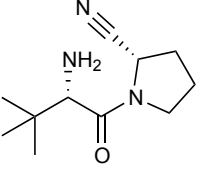   | 47                                                                                                                                                                                                                                                                                                                                                                                                                                                                                                             |
| 265 | Trp-boroAla |    | <sup>1</sup> H NMR (D <sub>2</sub> O) δ 7.64 (d, <i>J</i> = 7.8 Hz, 2H), 7.51 (d, <i>J</i> = 8.1 Hz, 2H), 7.32 - 7.15 (m, 3H), 4.26 (t, <i>J</i> = 7.6 Hz, 1H), 3.38 (d, <i>J</i> = 7.6 Hz, 2H), 2.76 (q, <i>J</i> = 7.4 Hz, 1H), 0.90 (d, <i>J</i> = 7.4 Hz, 3H). MS (ESI <sup>+</sup> ) <i>m/z</i> (rel intensity): 515.3 ([2 × (M - H <sub>2</sub> O) + H] <sup>+</sup> , 37), 258.1 ([M - H <sub>2</sub> O + H] <sup>+</sup> , 100).                                                                       |
| 266 | Trp-boroGly |    | <sup>1</sup> H NMR (D <sub>2</sub> O) δ 7.62 (d, <i>J</i> = 7.8 Hz, 1H), 7.54 (d, <i>J</i> = 8.1 Hz, 1H), 7.32 - 7.18 (m, 3H), 4.26 (t, <i>J</i> = 7.1 Hz, 1H), 3.39 (d, <i>J</i> = 7.1 Hz, 2H), 2.68 (d, <i>J</i> = 17.0 Hz, 1H), 2.54 (d, <i>J</i> = 17.0 Hz, 1H). MS (ESI <sup>+</sup> ) <i>m/z</i> (rel Intensity): 244.1 ([M - H <sub>2</sub> O + H] <sup>+</sup> , 100), 261.1 ([M + H] <sup>+</sup> , 20).                                                                                              |
| 267 | Trp-boroLeu |   | 35                                                                                                                                                                                                                                                                                                                                                                                                                                                                                                             |
| 268 | Trp-boroNva |  | <sup>1</sup> H NMR (D <sub>2</sub> O): δ 7.64 (d, <i>J</i> = 7.9 Hz, 1H), 7.52 (d, <i>J</i> = 8.0 Hz, 1H), 7.30 - 7.10 (m, 3H), 4.29 (dd, <i>J</i> = 8.8, 6.7 Hz, 1H), 3.45 - 3.31 (m, 2H), 2.63 (t, <i>J</i> = 5.9 Hz, 1H), 1.23 - 0.85 (m, 4H), 0.74 (t, <i>J</i> = 7.3 Hz, 3H). MS (ESI <sup>+</sup> ) <i>m/z</i> (rel intensity): 571.3 ([2 × (M - H <sub>2</sub> O) + H] <sup>+</sup> , 23), 326.2 ([M + Na] <sup>+</sup> , 6), 286.2 ([M - H <sub>2</sub> O + H] <sup>+</sup> , 100).                    |
| 269 | Trp-boroPhe |  | <sup>1</sup> H NMR (D <sub>2</sub> O) δ 7.63 (d, <i>J</i> = 7.9 Hz, 1H), 7.59 (d, <i>J</i> = 8.2 Hz, 1H), 7.45 - 7.19 (m, 6H), 6.90 - 6.80 (m, 2H), 4.25 (dd, <i>J</i> = 8.5, 7.1 Hz, 1H), 3.45 - 3.30 (m, 2H), 2.94 (dd, <i>J</i> = 10.4, 5.1 Hz, 1H), 2.67 (dd, <i>J</i> = 13.8, 5.1 Hz, 1H), 2.30 (dd, <i>J</i> = 13.8, 10.4 Hz, 1H). MS (ESI <sup>+</sup> ) <i>m/z</i> (rel Intensity): 334.1 ([M - H <sub>2</sub> O + H] <sup>+</sup> , 100), 667.3 ([2 × (M - H <sub>2</sub> O) + H] <sup>+</sup> , 40). |

|     |             |  |                                                                                                                                                                                                                                                                                                                                                                                                                                          |
|-----|-------------|--|------------------------------------------------------------------------------------------------------------------------------------------------------------------------------------------------------------------------------------------------------------------------------------------------------------------------------------------------------------------------------------------------------------------------------------------|
| 270 | Trp-boroPro |  | $^1\text{H NMR (D}_2\text{O)}$ $\delta$ 7.69 (d, $J$ = 7.8 Hz, 1H), 7.55 (d, $J$ = 8.1Hz, 1H), 7.36 (s, 1H), 7.30 - 7.20 (m, 2H), 4.55 (dd, $J$ = 9.0, 5.7 Hz, 1H), 3.80 - 3.75 (m, 1H), 3.49 (dd, $J$ = 15.1, 5.6 Hz, 1H), 3.38 - 3.06 (m, 3H), 2.09 - 2.01 (m, 3H), 1.73 - 1.68 (m, 1H). MS (ESI $^+$ ) $m/z$ (rel Intensity): 284.2 ( $[\text{M} - \text{H}_2\text{O} + \text{H}]^+$ , 70), 302.2 ( $[\text{M} + \text{H}]^+$ , 100). |
| 271 | Trp-boroSar |  | $^1\text{H NMR (D}_2\text{O)}$ $\delta$ 7.64 - 7.20 (m, 5H), 4.84 (dd, $J$ = 6.6, 8.2 Hz, 1H), 3.55 - 3.38 (m, 2H), 2.63 (s, 3H), 2.30 (s, 2H). $^{13}\text{C NMR (D}_2\text{O)}$ $\delta$ 173.25, 138.80, 128.99, 128.08, 124.91, 122.34, 120.37, 114.79, 108.03, 51.04, 47.60, 38.28, 28.83. MS (ESI $^+$ ) $m/z$ (rel intensity): 258.1 ( $[\text{M} - \text{H}_2\text{O} + \text{H}]^+$ , 100).                                      |
| 272 | Trp-Pro-CN  |  | $^1\text{H NMR (D}_2\text{O)}$ $\delta$ 7.70 (d, $J$ = 7.8 Hz, 1H), 7.57 (d, $J$ = 8.0 Hz, 1H), 7.34 (s, 1H), 7.33 - 7.18 (m, 2H), 4.59 (dd, $J$ = 9.1, 5.7 Hz, 1H), 3.56 - 3.34 (m, 3H), 2.76 - 2.71 (m, 1H), 2.22 - 2.13 (m, 2H), 1.88 - 1.83 (m, 1H), 1.68 - 1.64 (m, 1H). MS (ESI $^+$ ) $m/z$ (rel Intensity): 283.1 ( $[\text{M} + \text{H}]^+$ , 100), 305.1 ( $[\text{M} + \text{Na}]^+$ , 35).                                  |
| 273 | Tyr-boroAla |  | $^1\text{H NMR (D}_2\text{O)}$ $\delta$ 7.17 (d, $J$ = 8.5 Hz, 2H), 6.89 (d, $J$ = 8.5 Hz, 2H), 4.15 (t, $J$ = 7.3 Hz, 1H), 3.14 - 3.10 (m, 2H), 2.83 (q, $J$ = 7.4 Hz, 1H), 1.01 (d, $J$ = 7.4 Hz, 3H). MS (ESI $^+$ ) $m/z$ (rel intensity): 469.2 ( $[2 \times (\text{M} - \text{H}_2\text{O}) + \text{H}]^+$ , 67), 235.2 ( $[\text{M} - \text{H}_2\text{O} + \text{H}]^+$ , 100).                                                   |
| 274 | Tyr-boroGly |  | $^1\text{H NMR (D}_2\text{O)}$ $\delta$ 7.15 (d, $J$ = 8.1 Hz, 2H), 6.89 (d, $J$ = 8.1 Hz, 2H), 4.14 (t, $J$ = 7.3 Hz, 1H), 3.10 (d, $J$ = 7.3 Hz, 2H), 2.73 (d, $J$ = 16.9 Hz, 1H), 2.60 (d, $J$ = 16.9 Hz, 1H). MS (ESI $^+$ ) $m/z$ (rel Intensity): 221.1 ( $[\text{M} - \text{H}_2\text{O} + \text{H}]^+$ , 100), 441.2 ( $[2 \times (\text{M} - \text{H}_2\text{O}) + \text{H}]^+$ , 60).                                          |

|     |             |                                                                                     |                                                                                                                                                                                                                                                                                                                                                                                                                                                                                          |
|-----|-------------|-------------------------------------------------------------------------------------|------------------------------------------------------------------------------------------------------------------------------------------------------------------------------------------------------------------------------------------------------------------------------------------------------------------------------------------------------------------------------------------------------------------------------------------------------------------------------------------|
| 275 | Tyr-boroLeu | 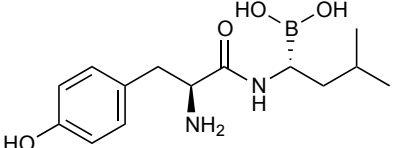   | 35                                                                                                                                                                                                                                                                                                                                                                                                                                                                                       |
| 276 | Tyr-boroNva |    | <sup>1</sup> H NMR (D <sub>2</sub> O): δ 7.15 (d, <i>J</i> = 8.4 Hz, 2H), 6.88 (d, <i>J</i> = 8.4 Hz, 2H), 4.15 (dd, <i>J</i> = 9.3, 6.4 Hz, 1H), 3.12 (ddd, <i>J</i> = 42.0, 13.7, 6.4 Hz, 2H), 2.66 (dd, <i>J</i> = 9.3, 5.5 Hz, 1H), 1.33 - 1.18 (m, 2H), 1.04 - 0.94 (m, 2H), 0.80 (t, <i>J</i> = 7.1 Hz, 3H). MS (ESI <sup>+</sup> ) <i>m/z</i> (rel intensity): 525.3 ([2 × (M - H <sub>2</sub> O) + H] <sup>+</sup> , 65), 263.2 ([M - H <sub>2</sub> O + H] <sup>+</sup> , 100). |
| 277 | Tyr-boroPhe |    | <sup>1</sup> H NMR (D <sub>2</sub> O) δ 7.31 - 7.20 (m, 3H), 7.17 (d, <i>J</i> = 8.4 Hz, 2H), 7.02 (d, <i>J</i> = 6.9 Hz, 2H), 6.92 (d, <i>J</i> = 8.4 Hz, 2H), 4.13 (dd, <i>J</i> = 8.8, 6.9 Hz, 1H), 3.20 - 3.00 (m, 3H), 2.84 (dd, <i>J</i> = 13.9, 5.2 Hz, 1H), 2.51 (dd, <i>J</i> = 13.9, 10.7 Hz, 1H). MS (ESI <sup>+</sup> ) <i>m/z</i> (rel Intensity): 311.1 ([M - H <sub>2</sub> O + H] <sup>+</sup> , 100).                                                                   |
| 278 | Tyr-boroPro |  | 34                                                                                                                                                                                                                                                                                                                                                                                                                                                                                       |
| 279 | Tyr-boroSar |  | <sup>1</sup> H NMR (D <sub>2</sub> O) δ 7.17 (d, <i>J</i> = 8.3 Hz, 2H), 6.90 (d, <i>J</i> = 8.3 Hz, 2H), 4.72 (dd, <i>J</i> = 6.6, 9.4 Hz, 1H), 3.29 - 3.09 (m, 2H), 2.69 (s, 3H), 2.42 (s, 2H). <sup>13</sup> C NMR (D <sub>2</sub> O) δ 172.81, 158.05, 133.59, 127.08, 118.57, 51.77, 47.55, 38.20. MS (ESI <sup>+</sup> ) <i>m/z</i> (rel intensity): 235.2 ([M - H <sub>2</sub> O + H] <sup>+</sup> , 100).                                                                        |
| 280 | Tyr-Pro-CN  |  | <sup>1</sup> H NMR (D <sub>2</sub> O) δ 7.21 (d, <i>J</i> = 8.4 Hz, 2H), 6.92 (d, <i>J</i> = 8.4 Hz, 2H), 4.46 (dd, <i>J</i> = 9.3, 5.4 Hz, 1H), 3.42 - 3.25 (m, 2H), 3.10 (dd, <i>J</i> = 13.5, 9.7 Hz, 1H), 2.72 - 2.69 (m, 1H), 2.25 - 2.17 (m, 2H), 1.97 - 1.92 (m, 1H), 1.79 - 1.73 (m, 1H). MS (ESI <sup>+</sup> ) <i>m/z</i> (rel Intensity): 260.1 ([M + H] <sup>+</sup> , 100), 519.2 ([2M + H] <sup>+</sup> , 75).                                                             |

|     |             |                                                                                     |                                                                                                                                                                                                                                                                                                                                                                                                                                                                                                                                   |
|-----|-------------|-------------------------------------------------------------------------------------|-----------------------------------------------------------------------------------------------------------------------------------------------------------------------------------------------------------------------------------------------------------------------------------------------------------------------------------------------------------------------------------------------------------------------------------------------------------------------------------------------------------------------------------|
| 281 | Val-boroAla | 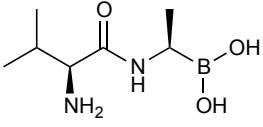   | 48                                                                                                                                                                                                                                                                                                                                                                                                                                                                                                                                |
| 282 | Val-boroGly |    | <sup>1</sup> H NMR (D <sub>2</sub> O): δ 3.73 (d, <i>J</i> = 6.5 Hz, 1H), 2.77 (d, <i>J</i> = 16.7 Hz, 1H), 2.66 (d, <i>J</i> = 16.7 Hz, 1H), 2.15 (dt, <i>J</i> = 6.6, 6.5 Hz, 1H), 0.98 (d, <i>J</i> = 6.6 Hz, 6H).<br><sup>13</sup> C NMR (D <sub>2</sub> O) δ 172.36, 61.30, 32.55, 30.90, 20.19, 19.68. MS (ESI <sup>+</sup> ) <i>m/z</i> (rel intensity): 313.2 ([2 × (M - H <sub>2</sub> O) + H] <sup>+</sup> , 59), 157.2 ([M - H <sub>2</sub> O + H] <sup>+</sup> , 100).                                                |
| 283 | Val-boroLeu |    | <sup>1</sup> H NMR (D <sub>2</sub> O) δ 3.82 (d, <i>J</i> = 6.2 Hz, 1H), 2.90 (dd, <i>J</i> = 9.1, 6.7 Hz, 1H), 2.28 - 2.17 (m, 1H), 1.62 - 1.33 (m, 3H), 1.04 (d, <i>J</i> = 2.8 Hz, 3H), 1.02 (d, <i>J</i> = 2.8 Hz, 3H), 0.91 (d, <i>J</i> = 4.0 Hz, 3H), 0.89 (d, <i>J</i> = 4.0 Hz, 3H). LCMS (ESI <sup>+</sup> ) <i>m/z</i> (rel intensity): 213.1 ([M - H <sub>2</sub> O + H] <sup>+</sup> , 90), 425.2 ([2 × (M - H <sub>2</sub> O) + H] <sup>+</sup> , 100), 637.4 ([3 × (M - H <sub>2</sub> O) + H] <sup>+</sup> , 60). |
| 284 | Val-boroNva |  | <sup>1</sup> H NMR (D <sub>2</sub> O): δ 3.81 (d, <i>J</i> = 6.2 Hz, 1H), 2.83 (t, <i>J</i> = 7.5 Hz, 1H), 2.25 - 2.16 (m, 1H), 1.56 - 1.48 (m, 2H), 1.41 - 1.28 (m, 2H), 1.04 - 1.00 (m, 6H), 0.89 (t, <i>J</i> = 7.3 Hz, 3H). MS (ESI <sup>+</sup> ) <i>m/z</i> (rel intensity): 595.5 ([3 × (M - H <sub>2</sub> O) + H] <sup>+</sup> , 6), 397.3 ([2 × (M - H <sub>2</sub> O) + H] <sup>+</sup> , 100), 199.2 ([M - H <sub>2</sub> O + H] <sup>+</sup> , 25).                                                                  |
| 285 | Val-boroPhe |  | <sup>1</sup> H NMR (D <sub>2</sub> O) δ 7.45 - 7.25 (m, 5H), 3.71 (d, <i>J</i> = 5.6 Hz, 1H), 3.15 (dd, <i>J</i> = 10.8, 6.1 Hz, 1H), 2.98 (dd, <i>J</i> = 14.1, 6.1 Hz, 1H), 2.78 (dd, <i>J</i> = 14.1, 10.8 Hz, 1H), 2.13 (q, <i>J</i> = 6.6 Hz, 1H), 1.01 (d, <i>J</i> = 6.6 Hz, 3H), 0.98 (d, <i>J</i> = 6.6 Hz, 3H). MS (ESI <sup>+</sup> ) <i>m/z</i> (rel Intensity): 247.1 ([M - H <sub>2</sub> O + H] <sup>+</sup> , 100), 493.2 ([2 × (M - H <sub>2</sub> O) + H] <sup>+</sup> , 50).                                   |

|     |                       |                                                                                      |                                                                                                                                                                                                                                                                                                                                                                                                                                              |
|-----|-----------------------|--------------------------------------------------------------------------------------|----------------------------------------------------------------------------------------------------------------------------------------------------------------------------------------------------------------------------------------------------------------------------------------------------------------------------------------------------------------------------------------------------------------------------------------------|
| 286 | Val-boroPro           | 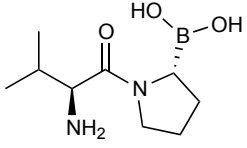    | 34                                                                                                                                                                                                                                                                                                                                                                                                                                           |
| 287 | Val-boroPro thioamide |     | <sup>1</sup> H NMR (D <sub>2</sub> O) δ 4.25 (d, <i>J</i> = 7.1 Hz, 1H), 4.05 - 3.95 (m, 1H), 3.70 - 3.60 (m, 1H), 3.55 - 3.45 (m, 1H), 2.35 - 1.80 (m, 5H), 1.07 - 1.00 (m, 6H). MS (ESI <sup>+</sup> ) <i>m/z</i> (rel intensity): 231.1 ([M + H] <sup>+</sup> , 100).                                                                                                                                                                     |
| 288 | Val-boroSar           |     | <sup>1</sup> H NMR (D <sub>2</sub> O) δ 4.42 (d, <i>J</i> = 6.5 Hz, 2H), 3.23 (s, 3H), 2.57 (d, <i>J</i> = 14.8 Hz, 1H), 2.50 (d, <i>J</i> = 14.8 Hz, 1H), 2.32 (dq, <i>J</i> = 6.9, 6.5 Hz, 1H), 1.05 (d, <i>J</i> = 6.9 Hz, 3H). <sup>13</sup> C NMR (D <sub>2</sub> O) δ 173.75, 51.59, 47.62, 38.74, 26.13, 10.76. MS (ESI <sup>+</sup> ) <i>m/z</i> (rel intensity): 171.1 ([M - H <sub>2</sub> O + H] <sup>+</sup> , 100).             |
| 289 | Val-boroSar thioamide |    | <sup>1</sup> H NMR (D <sub>2</sub> O) δ 4.45 (d, <i>J</i> = 7.4 Hz, 2H), 3.55 - 3.30 (m, 5H), 2.30 - 2.20 (m, 1H), 1.07 (d, <i>J</i> = 6.7 Hz, 3H), 1.00 (d, <i>J</i> = 6.9 Hz, 3H). MS (ESI <sup>+</sup> ) <i>m/z</i> (rel intensity): 205.2 ([M + H] <sup>+</sup> , 36), 187.1 ([M - H <sub>2</sub> O + H] <sup>+</sup> , 100).                                                                                                            |
| 290 | Val-Phe-Ala-boroGln   |  | <sup>1</sup> H NMR (D <sub>2</sub> O) δ 7.43 - 7.30 (m, 5H), 4.70 (m, 1H), 4.46 (q, <i>J</i> = 7.2 Hz, 1H), 3.77 (d, <i>J</i> = 5.7 Hz, 1H), 3.13 - 2.80 (m, 3H), 2.60 - 2.40 (m, 1H), 2.31 - 2.15 (m, 2H), 1.90 - 1.85 (m, 1H), 1.39 (d, <i>J</i> = 7.2 Hz, 3H), 1.0 (d, <i>J</i> = 3.9 Hz, 3H), 0.98 (d, <i>J</i> = 3.9 Hz, 3H). MS (ESI <sup>+</sup> ) <i>m/z</i> (rel Intensity): 446.3 ([M - H <sub>2</sub> O + H] <sup>+</sup> , 100). |
| 291 | Val-Pro-CN            |   | 49                                                                                                                                                                                                                                                                                                                                                                                                                                           |

**Supplementary Table 7** Evaluation of boronic acid-based ARI-2408 and ARI-2243 compared with clinically used DPP4 inhibitors in enzyme substrate assays for DPP4, DPP8, and DPP9. Monkey toxicity data for ARI-2408 and ARI-2243 is described in detail in **Supplementary Note 1**. The selectivity (for DPP4 over DPP8 and DPP9) and safety of compound ARI-2408, but not compound ARI-2243 or the clinically used drugs vildagliptin and saxagliptin, compares well to sitagliptin.

| Compound            | <i>K<sub>i</sub></i><br>(DPP IV) | <i>IC<sub>50</sub></i> |             |             | <i>Fold Selectivity</i> |               | Monkey<br>Adverse<br>Events |
|---------------------|----------------------------------|------------------------|-------------|-------------|-------------------------|---------------|-----------------------------|
|                     |                                  | <i>DPPIV</i>           | <i>DPP8</i> | <i>DPP9</i> | <i>DPP8</i>             | <i>DPP9</i>   |                             |
| <b>ARI-2408</b>     | 0.9 nM                           | 1.7 nM                 | 12 μM       | 11 μM       | <b>7,000X</b>           | <b>6,500X</b> | <b>No</b>                   |
| <b>ARI-2243</b>     | 27 pM                            | 0.7 nM                 | 3.8 nM      | 8.4 nM      | 5.4X                    | 12X           | Yes                         |
| <b>Vildagliptin</b> | 27 nM                            | 58 nM                  | 140 nM      | 110 nM      | 2.4X                    | 1.9X          | Yes                         |
| <b>Sitagliptin</b>  | 9 nM                             | 18 nM                  | 48 mM       | 10 mM       | 2,700X                  | 560X          | No                          |
| <b>Saxagliptin</b>  | 1.3 nM                           | 1.0 nM                 | 197 nM      | 54 nM       | 200X                    | 60X           | Yes                         |



**Supplementary Table 8** Safety profile of ARI-2408 and ARI-2243 compared to sitagliptin (Januvia) in monkeys. \*Januvia NDA (21-995) Review, 2006; Section 2.6.6.8: pp. 104-111

| <b>Proportion of Animals with observed Adverse Events<br/>(e.g., skin lesions, edema, or death)</b> |                 |                 |               |                    |
|-----------------------------------------------------------------------------------------------------|-----------------|-----------------|---------------|--------------------|
| <u>Dose</u>                                                                                         | <u>ARI-2243</u> | <u>ARI-2408</u> |               | <u>Sitagliptin</u> |
| (mg/kg)                                                                                             | <u>Single</u>   | <u>Single</u>   | <u>Repeat</u> | <u>Repeat*</u>     |
| 0.3                                                                                                 | 5/12            | -               | -             | -                  |
| 1.0                                                                                                 | 11/12           | -               | -             | -                  |
| 3.0                                                                                                 | 9/12            | -               | -             | -                  |
| 90.0                                                                                                | -               | -               | -             | -                  |
| 100.0                                                                                               | -               | 0/4             | 0/4           | 0/6                |
| 300.0                                                                                               | -               | 0/6             | -             | -                  |
| 500.0                                                                                               | -               | -               | -             | -                  |

## Supplementary Note 1

### *Detailed compound ARI-2408 monkey toxicity conclusions:*

Treatment with a single dose of compound ARI-2408 at 300 mg/kg or seven consecutive days of dosing at 100 mg/kg, did not result in any test article-related alterations in clinical observations or measured clinical chemistry parameters. Absolute neutrophil counts (ANE) and white blood cell (WBC) counts were increased in most animals at both doses at 24 hours postdose. The extent of the increase at 24 hours was similar between doses. Altered hematology parameters had returned to predose levels by Day 7. Notably, ARI-2408 exposure under both dosing regimens did not result in clinical observations of edema or swelling of the extremities in any animal, including four animals which had previously been dosed with compound ARI-2243 and observed to have edema and swelling.

### *Detailed compound ARI-2243 monkey toxicity conclusions:*

This study evaluated the toxicity of compound ARI-2243 when administered as daily oral doses to cynomolgous monkeys for two days at dose levels of 0 (vehicle control), 0.3, 1.0 and 3.0 mg/kg/day. Parameters which were evaluated in all animals to examine test article-related effects were: daily and detailed clinical observations, body weights/body weight change, food consumption, hematology, coagulation, and clinical chemistry. Physical examinations, ophthalmic examination, urinalysis, and electrocardiograms were performed pretest, but these parameters were not evaluated following dosing and so cannot be used to determine test article-related toxicity (except *ad hoc* physical examinations in one monkey when it was in poor health). In addition, plasma samples were collected for determination of whole blood concentrations of compound ARI-2243. Monkeys tolerated two daily doses of compound ARI-2243 at 0.3

mg/kg/day, but one monkey died after a single dose at 1 mg/kg and another was euthanized due to toxicity 10 days after a single dose at 3 mg/kg. Toxicity occurred at all dose levels and was manifested chiefly by clinical signs of edema and/or erythema of the skin of the extremities and peri-oral region, ulceration (noted as abrasions, crusts, sores, or sloughing) of the skin of the feet and tail, and increased lactate dehydrogenase (LDH), aspartate aminotransferase (AST), and creatine kinase (CK) activities. Postmortem findings in the euthanized monkey suggested that the clinical signs and changes in clinical chemistry parameters reflected tissue damage from drug-related skeletal muscle degeneration, vasculitis and thrombosis of dermal and submucosal blood vessels, and subsequent infarction of overlying skin and mucosa. When the study ended 12 days after dosing stopped, clinical chemistry changes had resolved completely but skin lesions were still present in some monkeys.

Based on these results, a no-observed-adverse-effect level was not identified. At the lowest dose level of 0.3 mg/kg/day, toxicity was limited to skin lesions on the feet of one monkey (incidence = 8%) and increased LDH, AST, and/or CK activities in three monkeys (incidence = 25%).

## Supplementary Note 2

### Synthetic Methods

#### Synthesis of Biotin-PEO<sub>4</sub>-FP (“FP-biotin”):

##### Scheme 1.

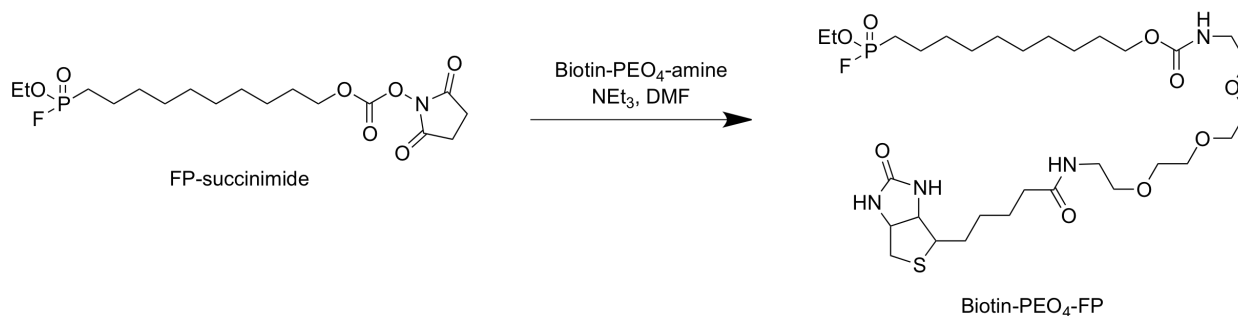

A solution of FP-succinimide<sup>50</sup> (41 mg, 0.1 mmol) in DMF (2.0 ml) was treated with Et<sub>3</sub>N (20.2 mg, 0.2 mmol) and biotin-PEO<sub>4</sub>-amine (50 mg, 0.12 mmol, purchased from ChemPep Inc. CAS No. 359860-27-8) at room temperature. The reaction mixture was stirred for 5 hrs and then concentrated *in vacuo*. The residue was partitioned into water and ethyl acetate. The organic phase was isolated and the aqueous phase was extracted with more ethyl acetate. All organic phases were combined and washed with water, then brine, dried over Na<sub>2</sub>SO<sub>4</sub> and concentrated under reduced pressure. Anhydrous Et<sub>2</sub>O (10 ml) was added to the residue and the mixture was ultrasonicated. The desired compound Biotin-PEO<sub>4</sub>-FP was precipitated out and the solvent was removed using pipette. This procedure was repeated for 3 times to give Biotin-PEO<sub>4</sub>-FP as a pale gray powder (30 mg, 42%). <sup>1</sup>H NMR (300 MHz, CDCl<sub>3</sub>): δ 6.72 (br, 1H), 6.47 (br, 1H), 5.49 (br, 1H), 5.36 (br, 1H), 4.55 - 4.45 (m, 1H), 4.30 - 4.20 (m, 3H), 4.05 - 3.95 (m, 2H), 3.65 - 3.59 (m, 8H), 3.59 - 3.52 (m, 4H), 3.45 - 3.30 (m, 4H), 3.15 - 3.05 (m, 1H), 2.95 - 2.85 (m, 1H), 2.80 - 2.70 (m, 1H), 2.22 - 2.19 (m, 2H), 1.90 - 1.75 (m, 2H), 1.75 - 1.57 (m, 8H), 1.45 - 1.27 (m, 17H). LC-MS (ESI<sup>+</sup>) *m/z* (rel intensity), 713.3 ((M + H)<sup>+</sup>, 100), 357.2 (32); <sup>13</sup>C NMR (75 MHz,

CDCl<sub>3</sub>):  $\delta$  176.00, 166.71, 159.59, 73.05, 72.88, 72.75, 72.66, 67.69, 65.72 ( $J=7.5$  Hz), 64.43, 62.88, 58.29, 43.41, 43.20, 41.80, 38.63, 33.06, 32.84, 32.11, 31.90, 31.74, 31.62, 30.89, 30.78, 28.51, 28.30, 28.06, 27.77, 26.17, 25.87, 24.58 ( $J=5.2$  Hz), 19.05 ( $J=6.0$  Hz);  $t_r = 9.6$  min (Column: Agilent Eclipse Plus C18 4.6 x 50 mm, 1.8  $\mu$ m particle size; Flow rate: 0.5 mL/min; Eluent gradient 2% B for the first 3 min, then from 2% to 98% B over 6 min and kept 98% B for 5 min; Solvent A, 0.1 % TFA in water; Solvent B, 0.08 % TFA in acetonitrile); Purity >98.5% (a/a). HRMS calcd for C<sub>31</sub>H<sub>59</sub>FN<sub>4</sub>O<sub>9</sub>PS [M + H]<sup>+</sup>, 713.3719 ; found, 713.3716.

**Synthesis of the boronic acid- and nitrile-based compounds.** Syntheses were performed using the previously described synthetic methods<sup>34, 42, 45, 51</sup>. All the target compounds were purified by RP-HPLC using Varian semi-preparative system with a Discovery C18 569226-U RP-HPLC column. The mobile phase was typically made by mixing water (0.1% TFA) with acetonitrile (0.08% TFA) in gradient concentration. Purities determined by HPLC analysis were greater than 95%. HRMS were performed by Technical Services of University of Michigan. Chemical characterization for numbered compounds not shown below is included in **Supplementary Table 6**.

**Compound 24.** Ala-boroPro thioxoamide or ARI-2243

<sup>1</sup>H NMR (300 MHz, D<sub>2</sub>O):  $\delta$  4.55 (q,  $J = 6.6$  Hz, 1H), 4.00-3.92 (m, 1H), 3.69 - 3.62 (m, 1H), 3.56 - 3.50 (m, 1H), 2.25 - 2.08 (m, 3H), 1.90 - 1.83 (m, 1H), 1.51 (d,  $J = 6.7$  Hz). <sup>13</sup>C NMR (300 MHz, D<sub>2</sub>O):  $\delta$  194.51, 60.36, 54.48, 54.38, 29.30, 28.78, 20.22. HRMS Calcd for C<sub>7</sub>H<sub>16</sub>BN<sub>2</sub>O<sub>2</sub>S [M + H]<sup>+</sup>, 203.1026; found 203.1030.

**Compound 33.** Ala-(1-naph)-boroPro

$^1\text{H}$  NMR (300 MHz,  $\text{D}_2\text{O}$ ):  $\delta$  8.10 – 7.46 (m, 7H), 4.65 - 4.55 (m, 1H), 2.78 - 3.75 (m, 5H), 1.99 - 1.4 (m, 4H).  $^{13}\text{C}$  NMR (300 MHz,  $\text{D}_2\text{O}$ ):  $\delta$  169.44, 136.28, 133.78, 132.01, 131.82, 131.65, 131.50, 129.73, 129.00, 128.52, 125.26, 54.37, 51.46, 49.98, 35.93, 29.17. HRMS Calcd for  $\text{C}_{17}\text{H}_{22}\text{BN}_2\text{O}_3$   $[\text{M} + \text{H}]^+$ , 313.1718; found 313.1727.

**Compound 36.** Ala-(1-naph)-Pro-CN

$^1\text{H}$  NMR (300 MHz,  $\text{D}_2\text{O}$ ):  $\delta$  8.16 – 7.99 (m, 3H). 7.76 - 7.46 (m, 4H), 4.80 - 4.64 (m, 2H), 4.00 - 3.50 (m, 3H), 3.10 - 3.04 (m, 1H), 2.11 – 3.31 (m, 4H).  $^{13}\text{C}$  NMR (300 MHz,  $\text{D}_2\text{O}$ ):  $\delta$  171.02, 136.11, 133.88, 131.77, 131.57, 131.44, 130.08, 129.11, 128.67, 125.22, 120.54, 54.01, 49.40, 49.23, 36.88, 31.67, 26.98. HRMS Calcd for  $\text{C}_{18}\text{H}_{20}\text{N}_3\text{O}$   $[\text{M} + \text{H}]^+$ , 294.1601; found 294.1611.

**Compound 51.** Asn-boroPhe

$^1\text{H}$  NMR (300 MHz,  $\text{D}_2\text{O}$ ):  $\delta$  7.42 - 7.27 (m, 5H), 4.27 (t,  $J = 6.2$  Hz, 1H), 3.26 - 3.20 (m, 1H), 3.00 - 2.75 (m, 4H).  $^{13}\text{C}$  NMR (300 MHz,  $\text{D}_2\text{O}$ ):  $\delta$  175.13, 171.72, 142.10, 131.57, 131.32, 129.21, 51.42, 46.32, 38.24, 37.43. HRMS Calcd for  $\text{C}_{12}\text{H}_{17}\text{BN}_3\text{O}_3$   $[\text{M} - \text{H}_2\text{O} + \text{H}]^+$ , 262.1357; found 262.1368.

**Compound 60.** Asp-boroPhe

$^1\text{H}$  NMR (300 MHz,  $\text{D}_2\text{O}$ ):  $\delta$  7.42 - 7.25 (m, 5H), 4.30 - 4.20 (m, 1H), 3.21 - 3.11 (m, 1H), 3.05 – 2.77 (m, 4H).  $^{13}\text{C}$  NMR (300 MHz,  $\text{D}_2\text{O}$ ):  $\delta$  175.75, 171.66, 142.14, 131.57, 131.33, 129.21, 51.36, 46.38, 38.22, 37.77. HRMS Calcd for  $\text{C}_{12}\text{H}_{16}\text{BN}_2\text{O}_4$   $[\text{M} - \text{H}_2\text{O} + \text{H}]^+$ , 263.1198; found 263.1210.

**Compound 93.** Glu-boroSar thioxoamide or ARI-2408

$^1\text{H}$  NMR (300 MHz,  $\text{D}_2\text{O}$ ):  $\delta$  4.65 (t,  $J = 6.4$  Hz, 1H), 3.15 (s, 3H), 2.53 (t,  $J = 7.1$  Hz, 2H), 2.47 (s, 2H) 2.25 - 2.05 (m, 2H).  $^{13}\text{C}$  NMR (300 MHz,  $\text{D}_2\text{O}$ ):  $\delta$  195.96, 178.82, 55.57, 52.00, 45.06, 31.03, 30.10. HRMS Calcd for  $\text{C}_7\text{H}_{14}\text{BN}_2\text{O}_4$   $[\text{M} - \text{H}_2\text{O} + \text{H}]^+$ , 201.1047; found 201.1043.

**Compound 99.** Gly-boroPhe

$^1\text{H}$  NMR (300 MHz,  $\text{D}_2\text{O}$ ):  $\delta$  7.57 - 7.04 (m, 5H), 3.72 (s, 2H), 3.33 - 3.27 (m, 1H), 3.00 - 2.58 (m, 2H).  $^{13}\text{C}$  NMR (300 MHz,  $\text{D}_2\text{O}$ ):  $\delta$  169.89, 142.08, 131.57, 131.28, 129.21, 46.19, 42.10, 38.38. HRMS Calcd for  $\text{C}_{10}\text{H}_{14}\text{BN}_2\text{O}_2$   $[\text{M} - \text{H}_2\text{O} + \text{H}]^+$ , 205.1143; found 205.1142.

**Compound 217.** Phe-Pro-CN

$^1\text{H}$  NMR (300 MHz,  $\text{D}_2\text{O}$ ):  $\delta$  7.48 - 7.33 (m, 5H) 4.52 (dd,  $J = 5.5$  Hz, 1H), 3.43 - 3.33 (m, 2H), 3.24 - 3.16 (m, 1H), 2.71 - 2.68 (m, 1H), 2.24 - 1.53 (m, 4H).  $^{13}\text{C}$  NMR (300 MHz,  $\text{D}_2\text{O}$ ):  $\delta$  170.87, 135.83, 132.92, 132.41, 130.92, 120.89, 55.58, 49.69, 49.50, 39.61, 27.33, 24.64. HRMS Calcd for  $\text{C}_{14}\text{H}_{18}\text{N}_3\text{O}$   $[\text{M} + \text{H}]^+$ , 244.1444; found 244.1452.

**Compound 226.** Py(D)Ala-boroPro

Previously characterized in ref. 42.

**Compound 244.** Ser-boroPhe

$^1\text{H}$  NMR (300 MHz,  $\text{D}_2\text{O}$ ):  $\delta$  7.40 - 7.25 (m, 5H), 4.15 - 4.05 (m, 1H), 3.95 - 3.80 (m, 2H), 3.30 - 3.20 (m, 1H), 3.00 - 2.75 (m, 2H).  $^{13}\text{C}$  NMR (300 MHz,  $\text{D}_2\text{O}$ ):  $\delta$  170.69, 142.09, 131.60, 131.29, 129.22, 62.78, 56.24, 46.37, 38.36. HRMS Calcd for  $\text{C}_{11}\text{H}_{16}\text{BN}_2\text{O}_3$   $[\text{M} - \text{H}_2\text{O} + \text{H}]^+$ , 235.1248; found 235.1256.

## Supplementary References

1. Bachovchin, D.A. et al. Academic cross-fertilization by public screening yields a remarkable class of protein phosphatase methylesterase-1 inhibitors. *Proc. Natl. Acad. Sci. USA* **108**, 6811-6816 (2011).
2. Flentke, G.R. et al. Inhibition of dipeptidyl aminopeptidase IV (DP-IV) by Xaa-boroPro dipeptides and use of these inhibitors to examine the role of DP-IV in T-cell function. *Proc. Natl. Acad. Sci. USA* **88**, 1556-1559 (1991).
3. Wu, W. et al. 4-Substituted boro-proline dipeptides: synthesis, characterization, and dipeptidyl peptidase IV, 8, and 9 activities. *Bioorg. Med. Chem. Lett.* **22**, 5536-5540 (2012).
4. Suda, H., Aoyagi, T., Hamada, M., Takeuchi, T. & Umezawa, H. Antipain, a new protease inhibitor isolated from actinomycetes. *J. Antibiot.* **25**, 263-266 (1972).
5. Zimmerman, M. et al. Direct fluorescent assay of urokinase and plasminogen activators of normal and malignant cells: kinetics and inhibitor profiles. *Proc. Natl. Acad. Sci. USA* **75**, 750-753 (1978).
6. Ghafouri, N. et al. Inhibition of monoacylglycerol lipase and fatty acid amide hydrolase by analogues of 2-arachidonoylglycerol. *Br. J. Pharmacol.* **143**, 774-784 (2004).
7. Liverton, N.J. et al. MK-7009, a potent and selective inhibitor of hepatitis C virus NS3/4A protease. *Antimicrob. Agents Chemother.* **54**, 305-311 (2010).
8. Lunven, C. et al. Inhibition by Argatroban, a specific thrombin inhibitor, of platelet activation by fibrin clot-associated thrombin. *Thromb. Haemost.* **75**, 154-160 (1996).
9. Arastu-Kapur, S. et al. Nonproteasomal targets of the proteasome inhibitors bortezomib and carfilzomib: a link to clinical adverse events. *Clin. Cancer. Res.* **17**, 2734-2743 (2011).
10. He, S., Gaca, M.D., McEuen, A.R. & Walls, A.F. Inhibitors of chymase as mast cell-stabilizing agents: contribution of chymase in the activation of human mast cells. *J. Pharmacol. Exp. Ther.* **291**, 517-523 (1999).
11. Eisert, W.G. et al. Dabigatran: an oral novel potent reversible nonpeptide inhibitor of thrombin. *Atertio. Thromb. Vasc. Biol.* **30**, 1885-1889 (2010).
12. Sugimoto, H., Iimura, Y., Yamanishi, Y. & Yamatsu, K. Synthesis and structure-activity relationships of acetylcholinesterase inhibitors: 1-benzyl-4-[(5,6-dimethoxy-1-oxoindan-2-yl)methyl]piperidine hydrochloride and related compounds. *J. Med. Chem.* **38**, 4821-4829 (1995).
13. Bachovchin, D.A., Brown, S.J., Rosen, H. & Cravatt, B.F. Identification of selective inhibitors of uncharacterized enzymes by high-throughput screening with fluorescent activity-based probes. *Nat. Biotechnol.* **27**, 387-394 (2009).
14. Muramatu, M. & Fujii, S. Inhibitory effects of -guanidino acid esters on trypsin, plasmin, plasma kallikrein and thrombin. *Biochim. Biophys. Acta* **268**, 221-224 (1972).
15. Ohno, H., Kosaki, G., Kambayashi, J., Imaoka, S. & Hirata, F. FOY: [ethyl P-(6-guanidinohexanoyloxy) benzoate] methanesulfonate as a serine proteinase inhibitor. I. Inhibition of thrombin and factor Xa in vitro. *Thromb. Res.* **19**, 579-588 (1980).
16. Alexander, J.P. & Cravatt, B.F. Mechanism of carbamate inactivation of FAAH: implications for the design of covalent inhibitors and in vivo functional probes for enzymes. *Chem. Biol.* **12**, 1179-1187 (2005).



17. Chang, J.W., Nomura, D.K. & Cravatt, B.F. A potent and selective inhibitor of KIAA1363/AADACL1 that impairs prostate cancer pathogenesis. *Chem. Biol.* **18**, 476-484 (2011).
18. Long, J.Z., Jin, X., Adibekian, A., Li, W. & Cravatt, B.F. Characterization of tunable piperidine and piperazine carbamates as inhibitors of endocannabinoid hydrolases. *J. Med. Chem.* **53**, 1830-1842 (2010).
19. Takasaki, K. et al. K579, a slow-binding inhibitor of dipeptidyl peptidase IV, is a long-acting hypoglycemic agent. *Eur. J. Pharmacol.* **486**, 335-342 (2004).
20. Deutsch, D.G. et al. Methyl arachidonoyl fluorophosphonate: a potent irreversible inhibitor of anandamide amidase. *Biochem. Pharmacol.* **53**, 255-260 (1997).
21. Gustafsson, D. et al. Effects of melagatran, a new low-molecular-weight thrombin inhibitor, on thrombin and fibrinolytic enzymes. *Thromb. Haemost.* **79**, 110-118 (1998).
22. Riester, D. et al. Thrombin inhibitors identified by computer-assisted multiparameter design. *Proc. Natl. Acad. Sci. USA* **102**, 8597-8602 (2005).
23. Saario, S.M. et al. Characterization of the sulfhydryl-sensitive site in the enzyme responsible for hydrolysis of 2-arachidonoyl-glycerol in rat cerebellar membranes. *Chem. Biol.* **12**, 649-656 (2005).
24. Hoover, H.S., Blankman, J.L., Niessen, S. & Cravatt, B.F. Selectivity of inhibitors of endocannabinoid biosynthesis evaluated by activity-based protein profiling. *Bioorg. Med. Chem. Lett.* **18**, 5838-5841 (2008).
25. Lange, U.E. & Zechel, C. Solid-phase synthesis of thrombin inhibitors. *Bioorg. Med. Chem. Lett.* **12**, 1571-1573 (2002).
26. Ahn, K. et al. Discovery and characterization of a highly selective FAAH inhibitor that reduces inflammatory pain. *Chem. Biol.* **16**, 411-420 (2009).
27. Atack, J.R., Yu, Q.S., Soncrant, T.T., Brossi, A. & Rapoport, S.I. Comparative inhibitory effects of various physostigmine analogs against acetyl- and butyrylcholinesterases. *J. Pharmacol. Exp. Ther.* **249**, 194-202 (1989).
28. Perzborn, E. et al. In vitro and in vivo studies of the novel antithrombotic agent BAY 59-7939--an oral, direct Factor Xa inhibitor. *Journal of thrombosis and haemostasis : JTH* **3**, 514-521 (2005).
29. Portevin, B. et al. New prolyl endopeptidase inhibitors: in vitro and in vivo activities of azabicyclo[2.2.2]octane, azabicyclo[2.2.1]heptane, and perhydroindole derivatives. *J. Med. Chem.* **39**, 2379-2391 (1996).
30. Wang, A. et al. Potency, selectivity and prolonged binding of saxagliptin to DPP4: maintenance of DPP4 inhibition by saxagliptin in vitro and ex vivo when compared to a rapidly-dissociating DPP4 inhibitor. *BMC Pharmacol.* **12**, 2 (2012).
31. Connolly, B.A. et al. Dipeptide boronic acid inhibitors of dipeptidyl peptidase IV: determinants of potency and in vivo efficacy and safety. *J. Med. Chem.* **51**, 6005-6013 (2008).
32. Li, W., Blankman, J.L. & Cravatt, B.F. A functional proteomic strategy to discover inhibitors for uncharacterized hydrolases. *J. Am. Chem. Soc.* **129**, 9594-9595 (2007).
33. Friedman, T.C., Orłowski, M. & Wilk, S. Prolyl endopeptidase: inhibition in vivo by N-benzyloxycarbonyl-prolyl-prolinal. *J. Neurochem.* **42**, 237-241 (1984).
34. Coutts, S.J. et al. Structure-activity relationships of boronic acid inhibitors of dipeptidyl peptidase IV. 1. Variation of the P2 position of Xaa-boroPro dipeptides. *J. Med. Chem.* **39**, 2087-2094 (1996).

35. Milo, L.J., Jr. et al. Chemical and biological evaluation of dipeptidyl boronic acid proteasome inhibitors for use in prodrugs and pro-soft drugs targeting solid tumors. *J. Med. Chem.* **54**, 4365-4377 (2011).
36. Senten, K. et al. Design, synthesis, and SAR of potent and selective dipeptide-derived inhibitors for dipeptidyl peptidases. *J. Med. Chem.* **46**, 5005-5014 (2003).
37. Lankas, G.R. et al. Dipeptidyl peptidase IV inhibition for the treatment of type 2 diabetes: potential importance of selectivity over dipeptidyl peptidases 8 and 9. *Diabetes* **54**, 2988-2994 (2005).
38. Li, J., Wilk, E. & Wilk, S. Aminoacylpyrrolidine-2-nitriles: potent and stable inhibitors of dipeptidyl-peptidase IV (CD 26). *Arch. Biochem. Biophys.* **323**, 148-154 (1995).
39. Sudmeier, J.L. et al. Autochelation in dipeptide boronic acids: pH-dependent structures and equilibria of Asp-boroPro and His-boroPro by NMR spectroscopy. *J. Am. Chem. Soc.* **127**, 8112-8119 (2005).
40. Adams, J. et al. Potent and selective inhibitors of the proteasome: dipeptidyl boronic acids. *Bioorg. Med. Chem. Lett.* **8**, 333-338 (1998).
41. Villhauer, E.B. et al. 1-[2-[(5-Cyanopyridin-2-yl)amino]ethylamino]acetyl-2-(S)-pyrrolidinecarbonitrile: a potent, selective, and orally bioavailable dipeptidyl peptidase IV inhibitor with antihyperglycemic properties. *J. Med. Chem.* **45**, 2362-2365 (2002).
42. Poplawski, S.E. et al. Identification of selective and potent inhibitors of fibroblast activation protein and prolyl oligopeptidase. *J. Med. Chem.* **56**, 3467-3477 (2013).
43. Jansen, K. et al. Selective inhibitors of fibroblast activation protein (FAP) with a (4-quinolinoyl)-glycyl-2-cyanopyrrolidine scaffold. *ACS Med. Chem. Lett.* **4**, 491-496 (2013).
44. Van der Veken, P. et al. Inhibitors of dipeptidyl peptidase 8 and dipeptidyl peptidase 9. Part 1: identification of dipeptide derived leads. *Bioorg. Med. Chem. Lett.* **18**, 4154-4158 (2008).
45. Ashworth, D.M. et al. 2-cyanopyrrolidides as potent, stable inhibitors of dipeptidyl peptidase IV. *Bioorg. Med. Chem. Lett.* **6**, 1163-1166 (1996).
46. Rosenblum, J.S., Minimo, L.C., Liu, Y.S., Wu, J.Y. & Kozarich, J.W. The case against GI toxicity from acute DPP8/9 inhibition. *Diabetes* **56**, A138-A138 (2007).
47. Sudre, B. et al. Chronic inhibition of circulating dipeptidyl peptidase IV by FE 999011 delays the occurrence of diabetes in male Zucker diabetic fatty rats. *Diabetes* **51**, 1461-1469 (2002).
48. Shreder, K.R. et al. Boro-norleucine as a P1 residue for the design of selective and potent DPP7 inhibitors. *Bioorg. Med. Chem. Lett.* **15**, 4256-4260 (2005).
49. Villhauer, E.B. et al. 1-[[3-hydroxy-1-adamantyl)amino]acetyl]-2-cyano-(S)-pyrrolidine: a potent, selective, and orally bioavailable dipeptidyl peptidase IV inhibitor with antihyperglycemic properties. *J. Med. Chem.* **46**, 2774-2789 (2003).
50. Tully, S.E. & Cravatt, B.F. Activity-based probes that target functional subclasses of phospholipases in proteomes. *J. Am. Chem. Soc.* **132**, 3264-3265 (2010).
51. Zhu, Y. et al. Design, synthesis, biological evaluation, and structure-activity relationship (SAR) discussion of dipeptidyl boronate proteasome inhibitors, part I: comprehensive understanding of the SAR of alpha-amino acid boronates. *J. Med. Chem.* **52**, 4192-4199 (2009).
